# Supplementary material
Source: publisher figshare collection journal article supplement (https://gsapubs.figshare.com/ndownloader/files/22411770)

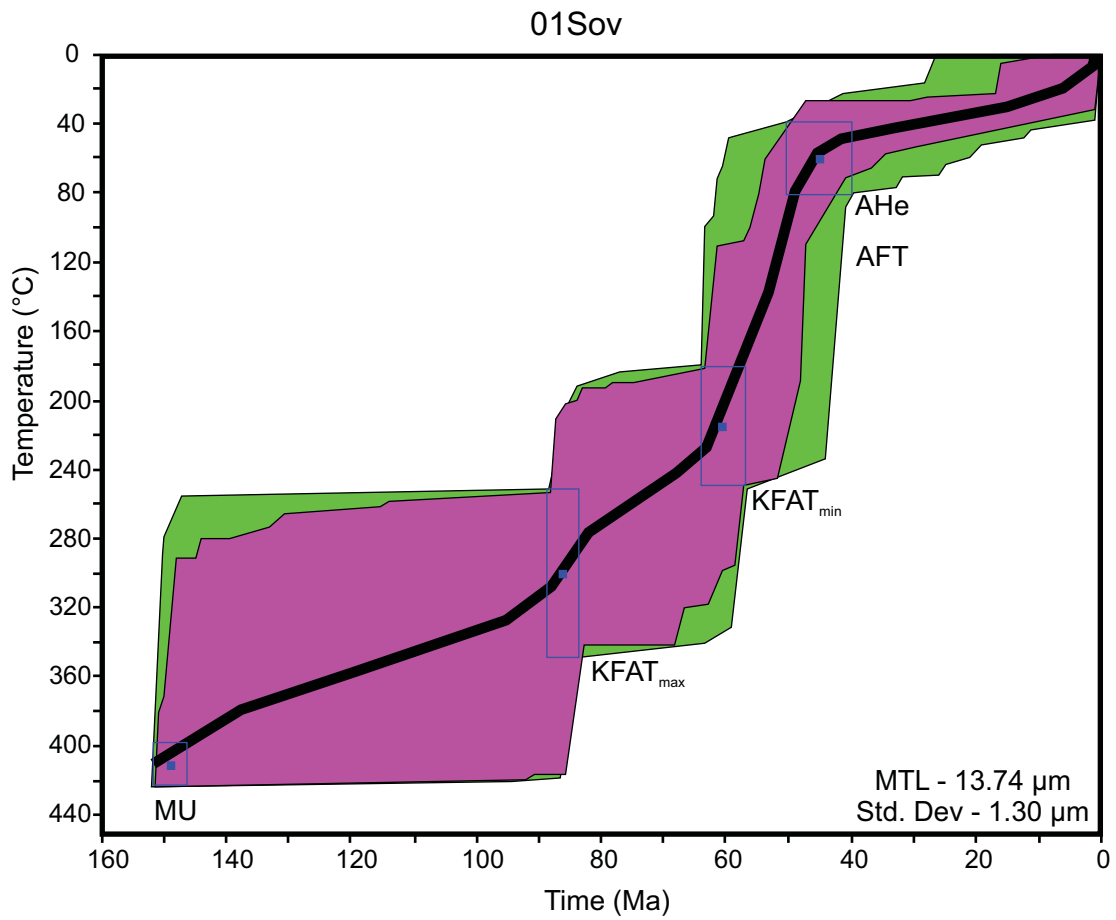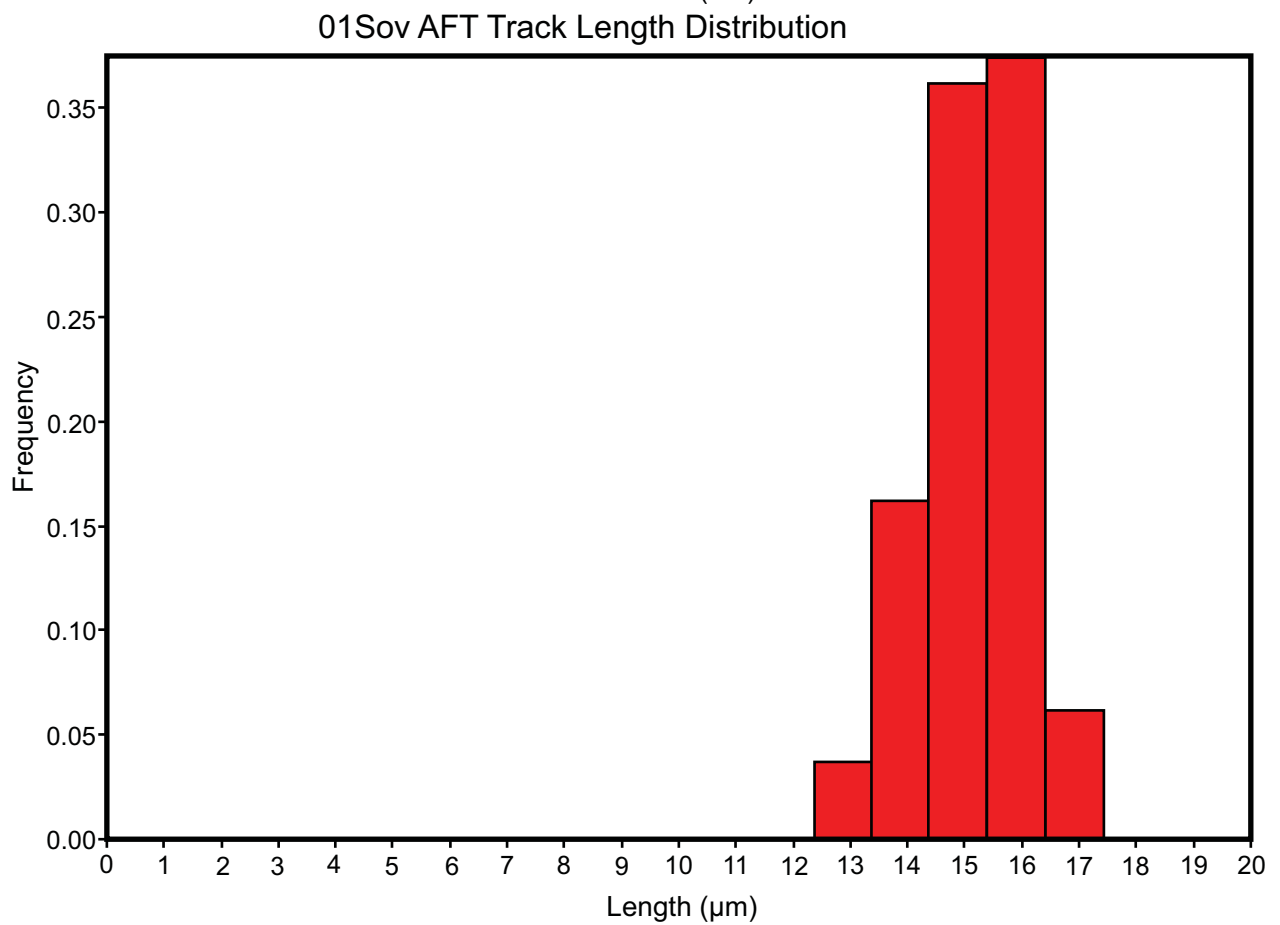

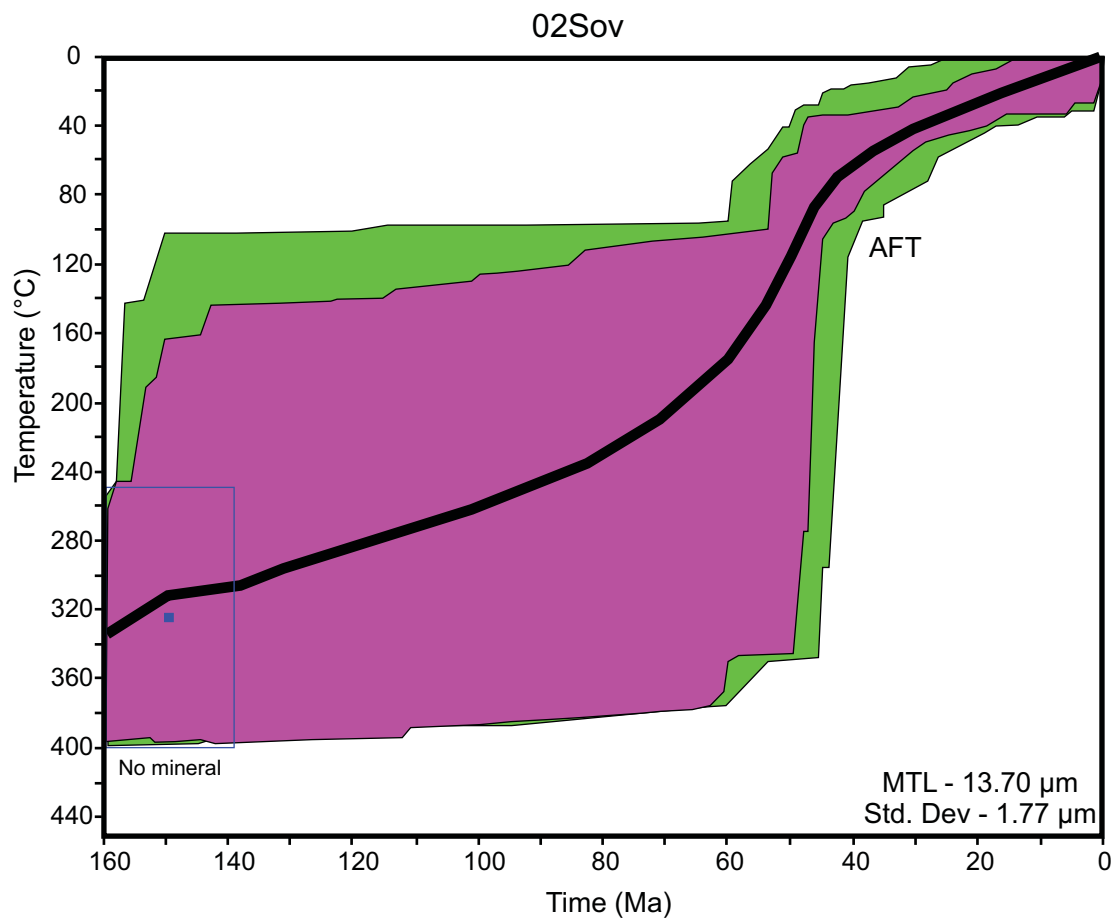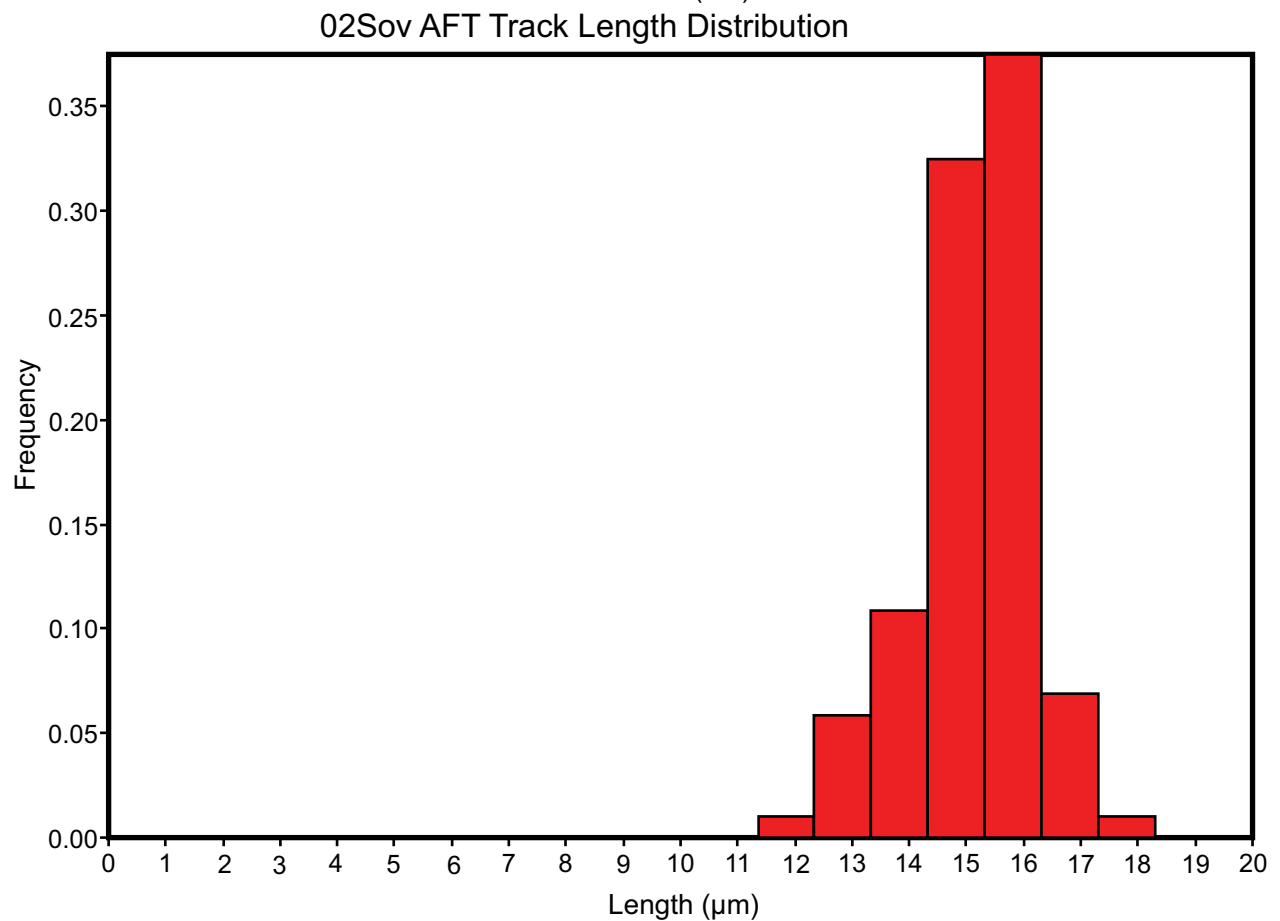

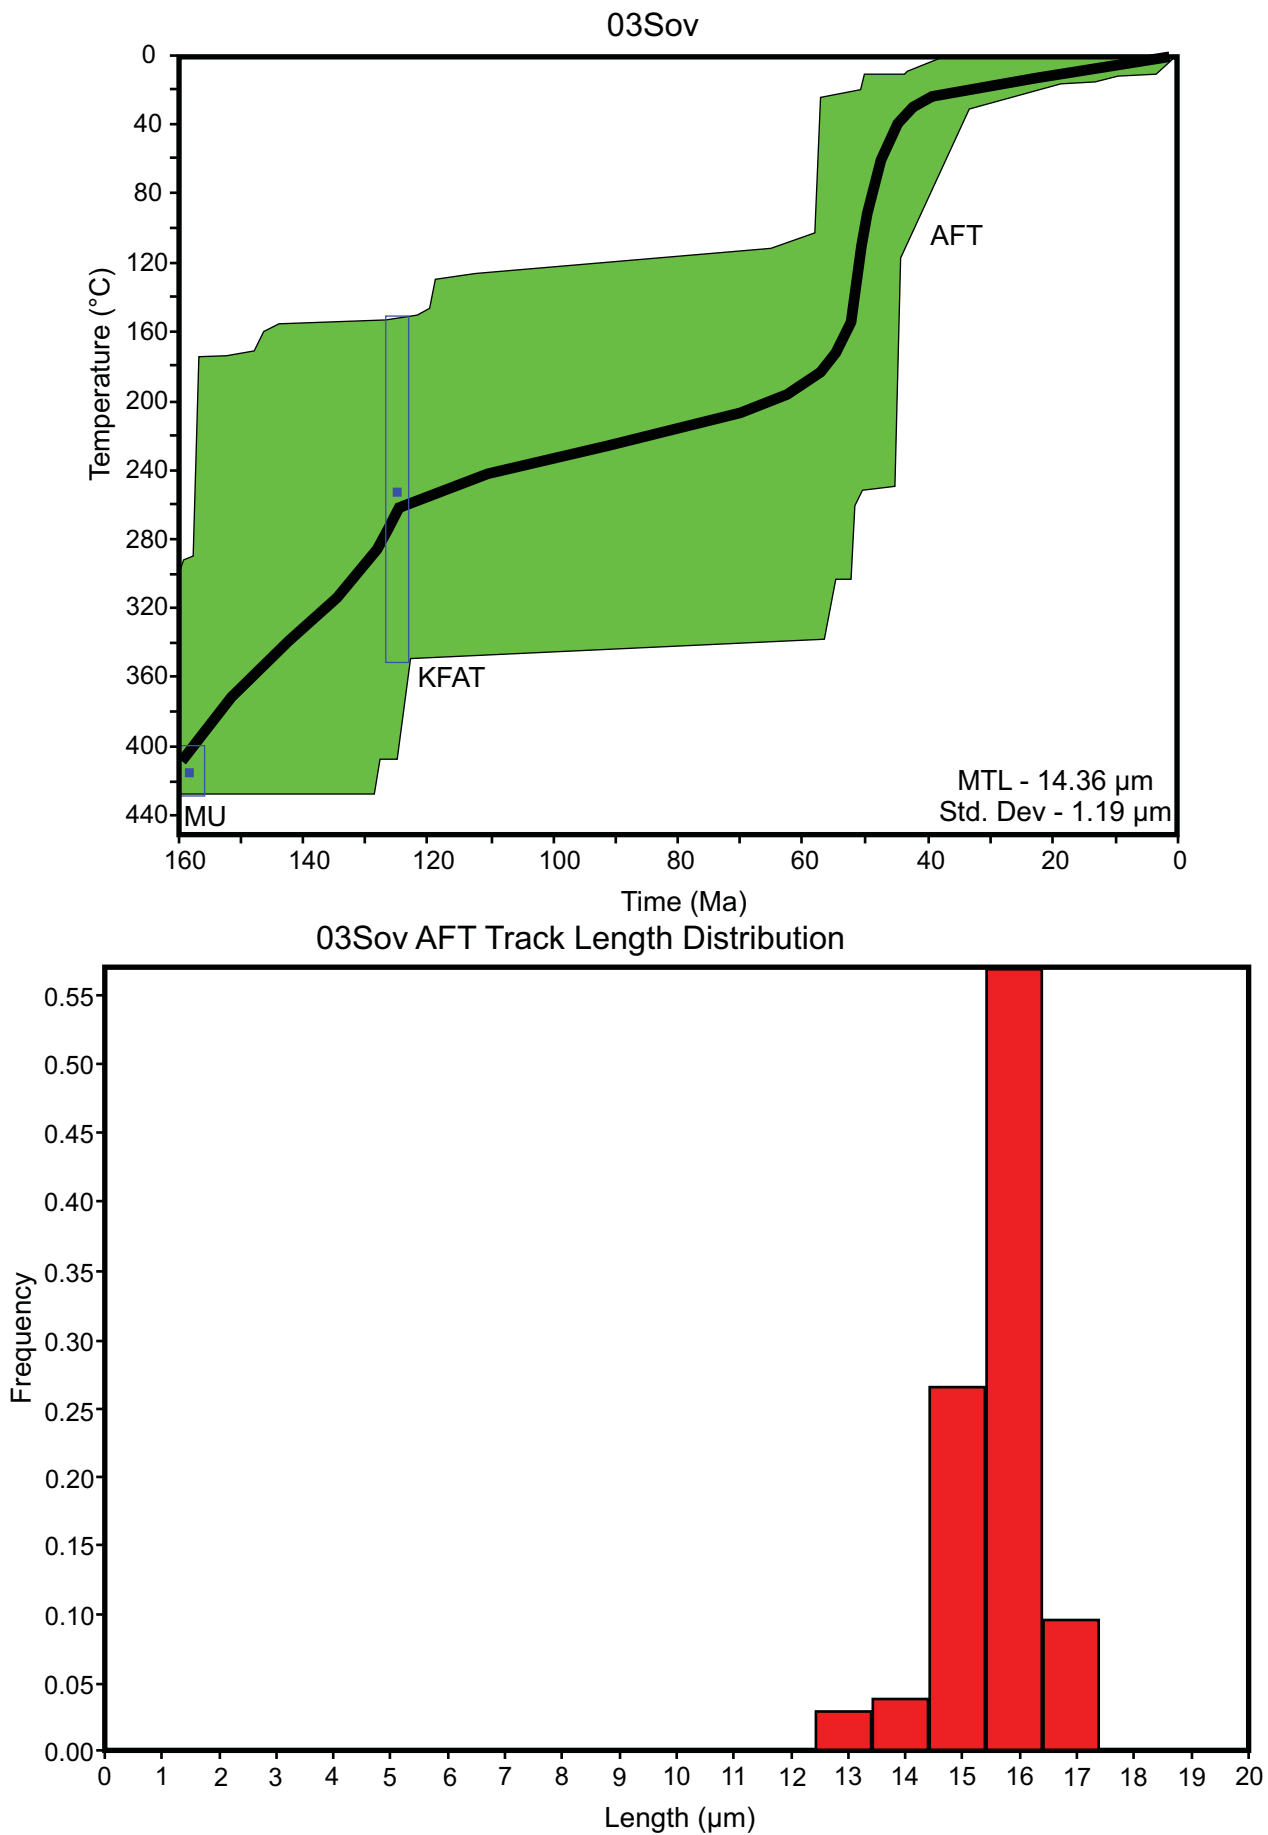

Patrick Terhune, Figure DR6.3

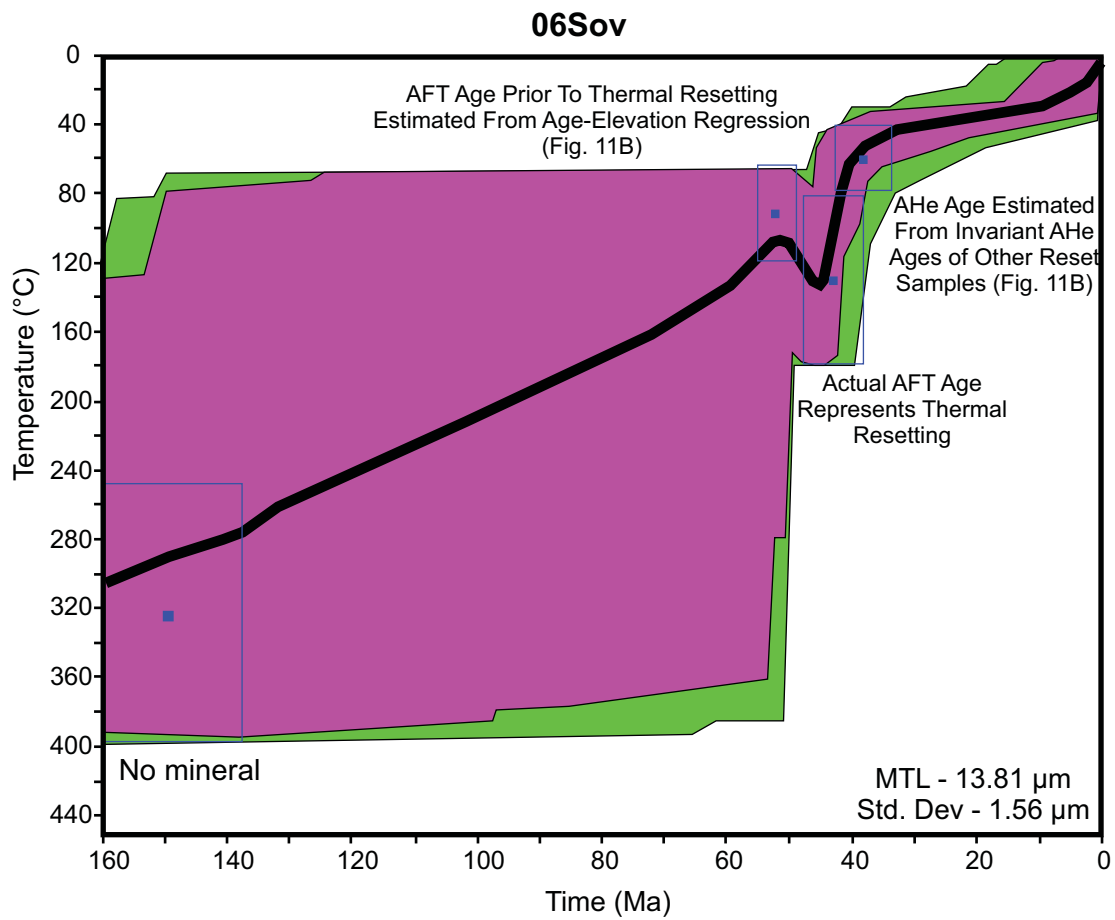

06Sov AFT Track Length Distribution

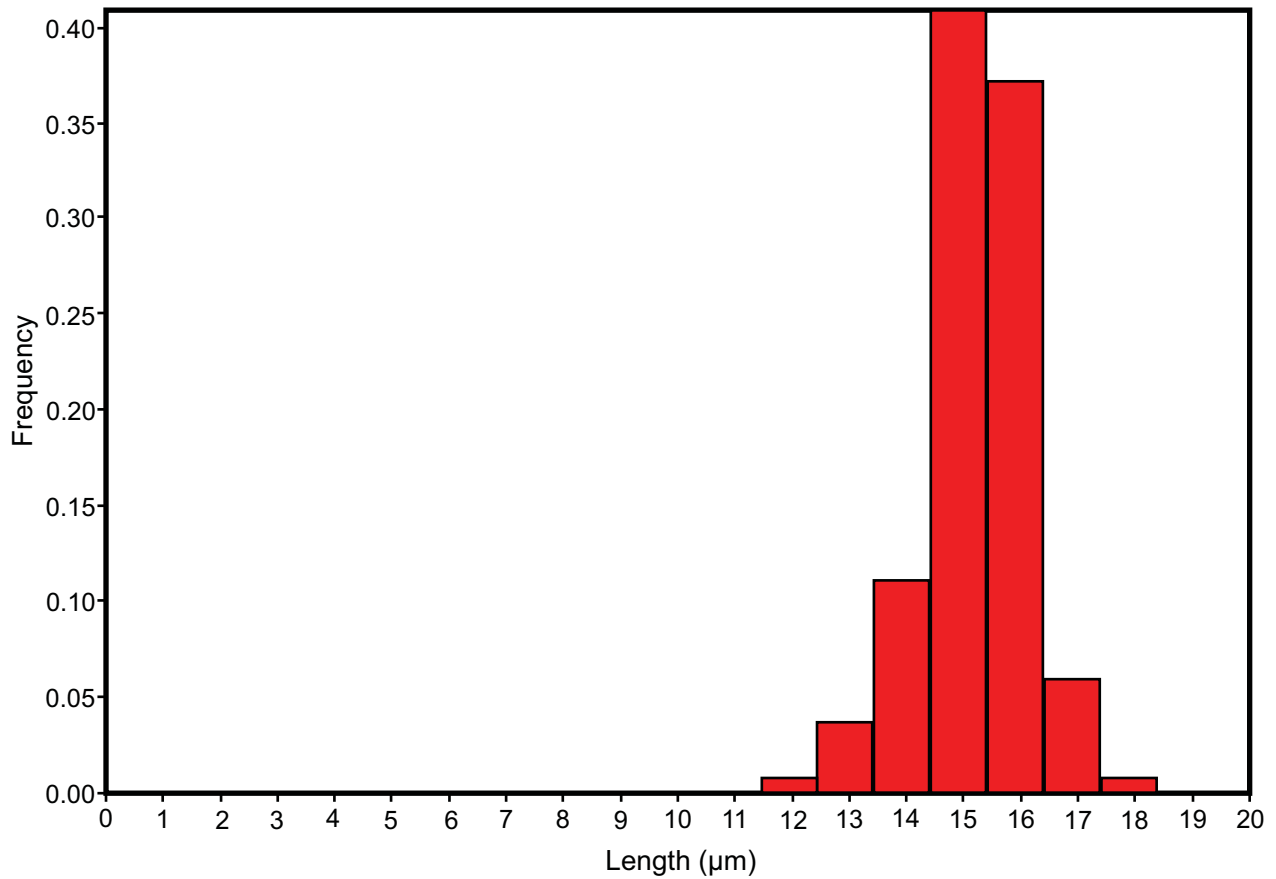

Patrick Terhune, Figure DR6.4

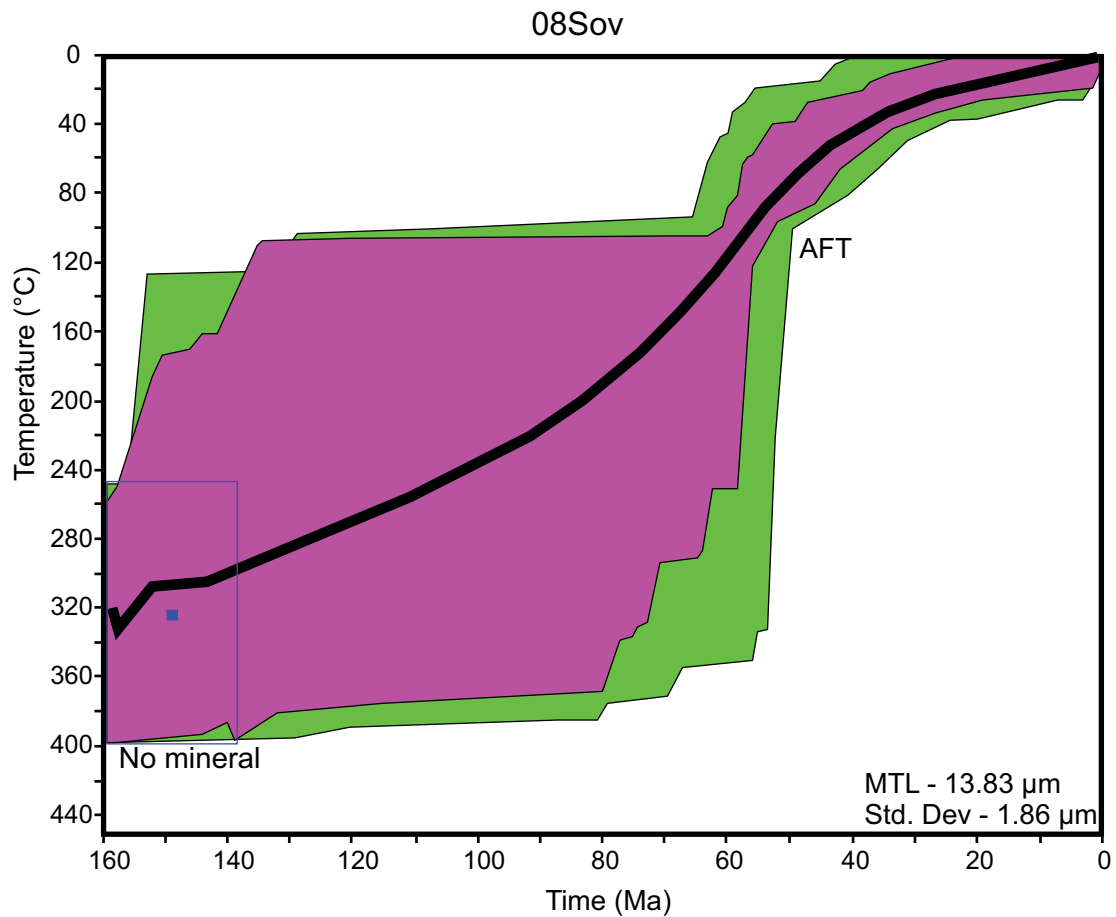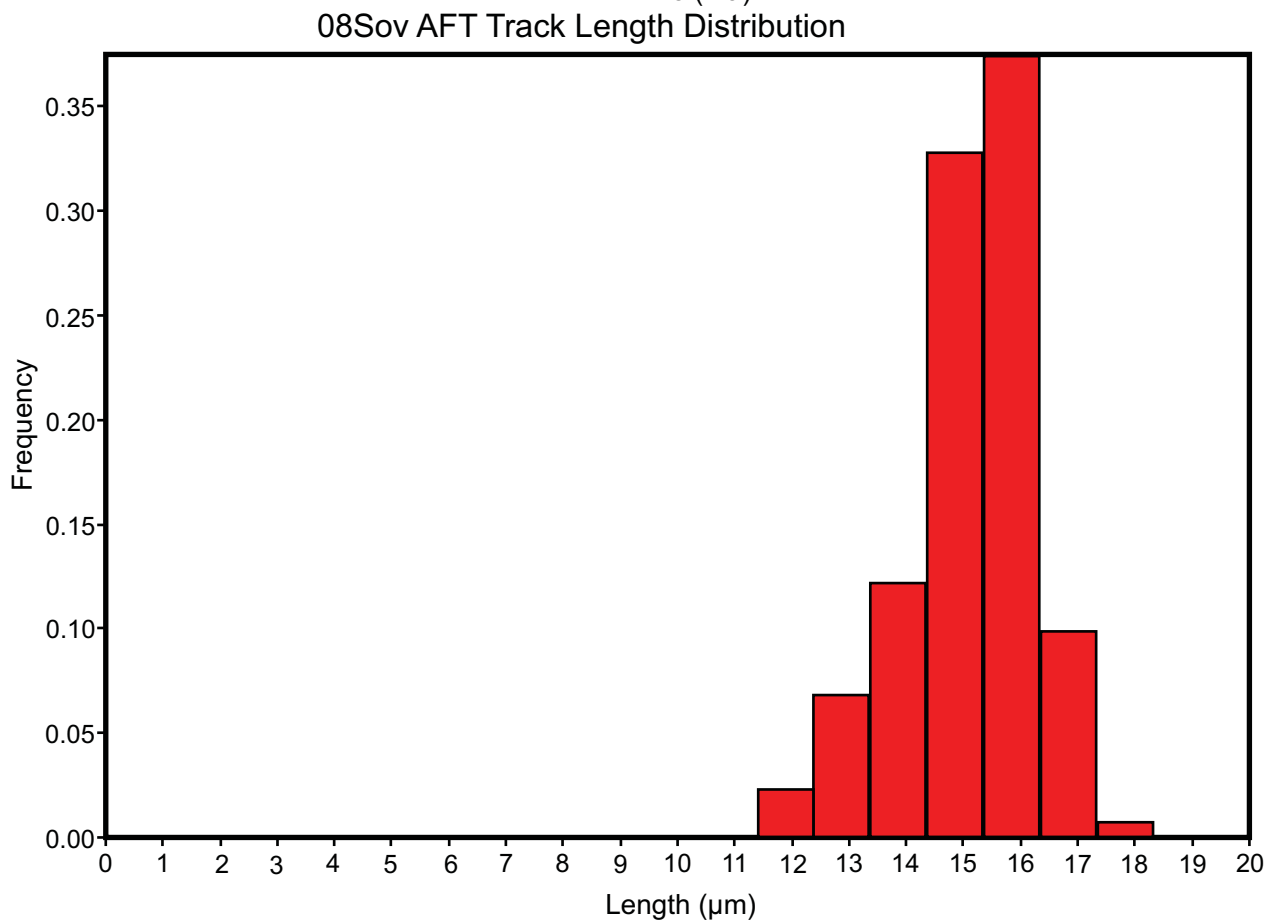

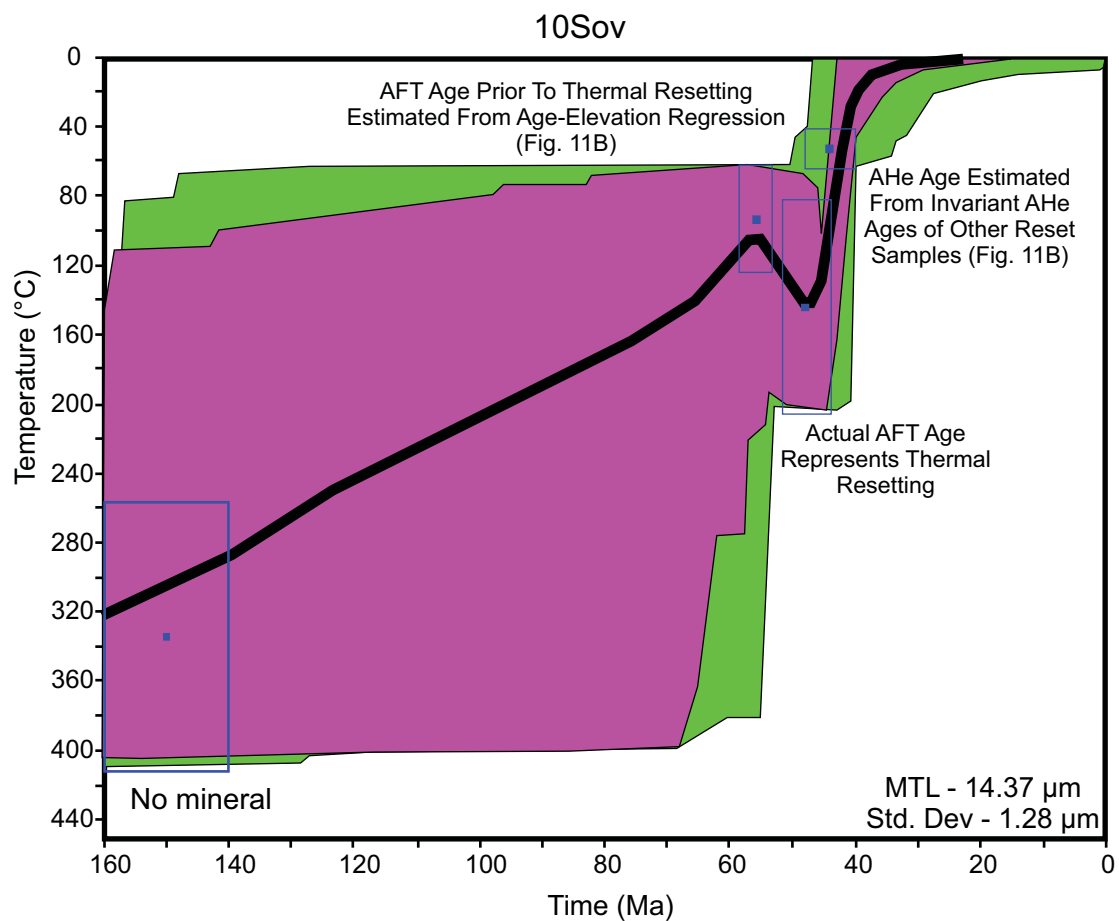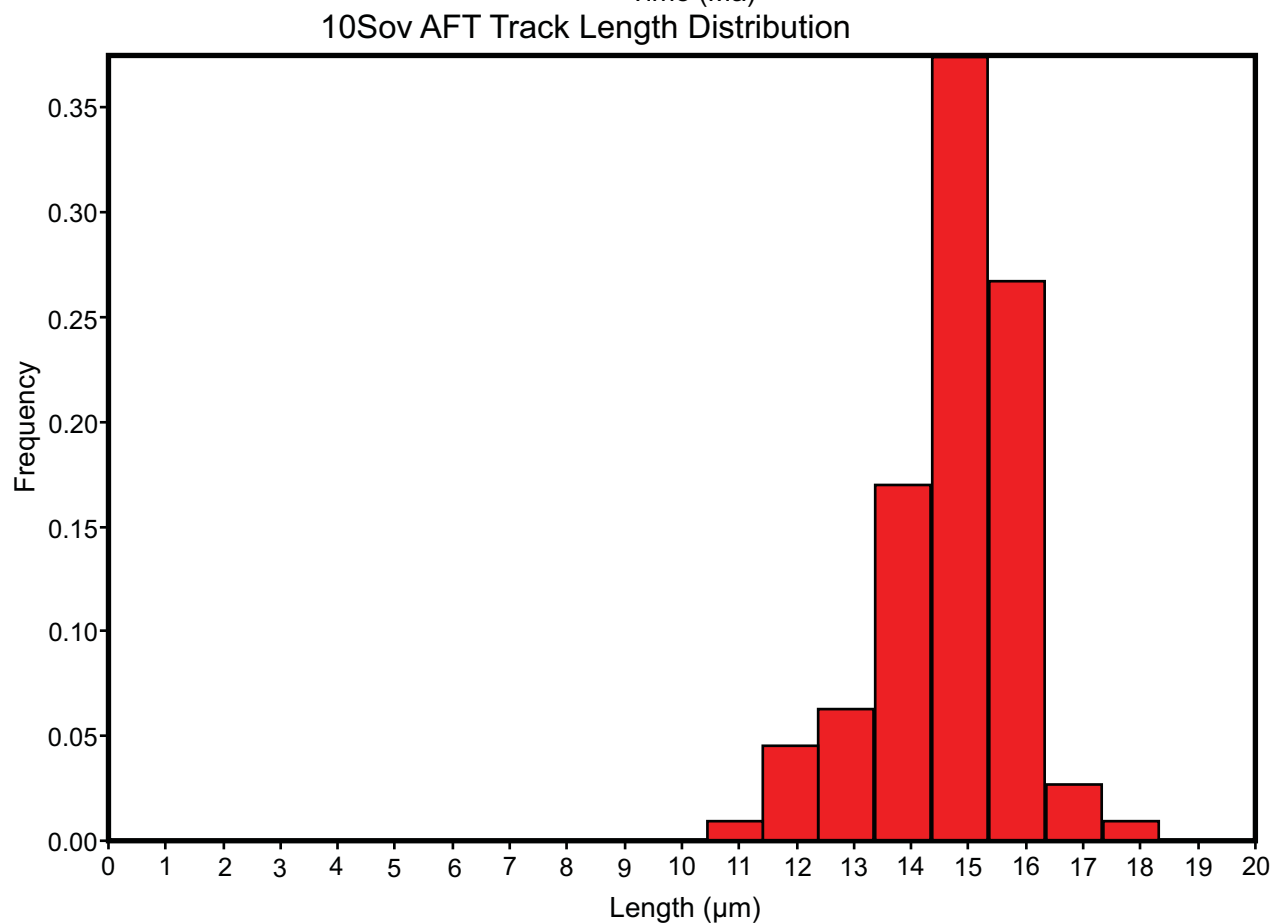

Patrick Terhune, Figure DR6.6

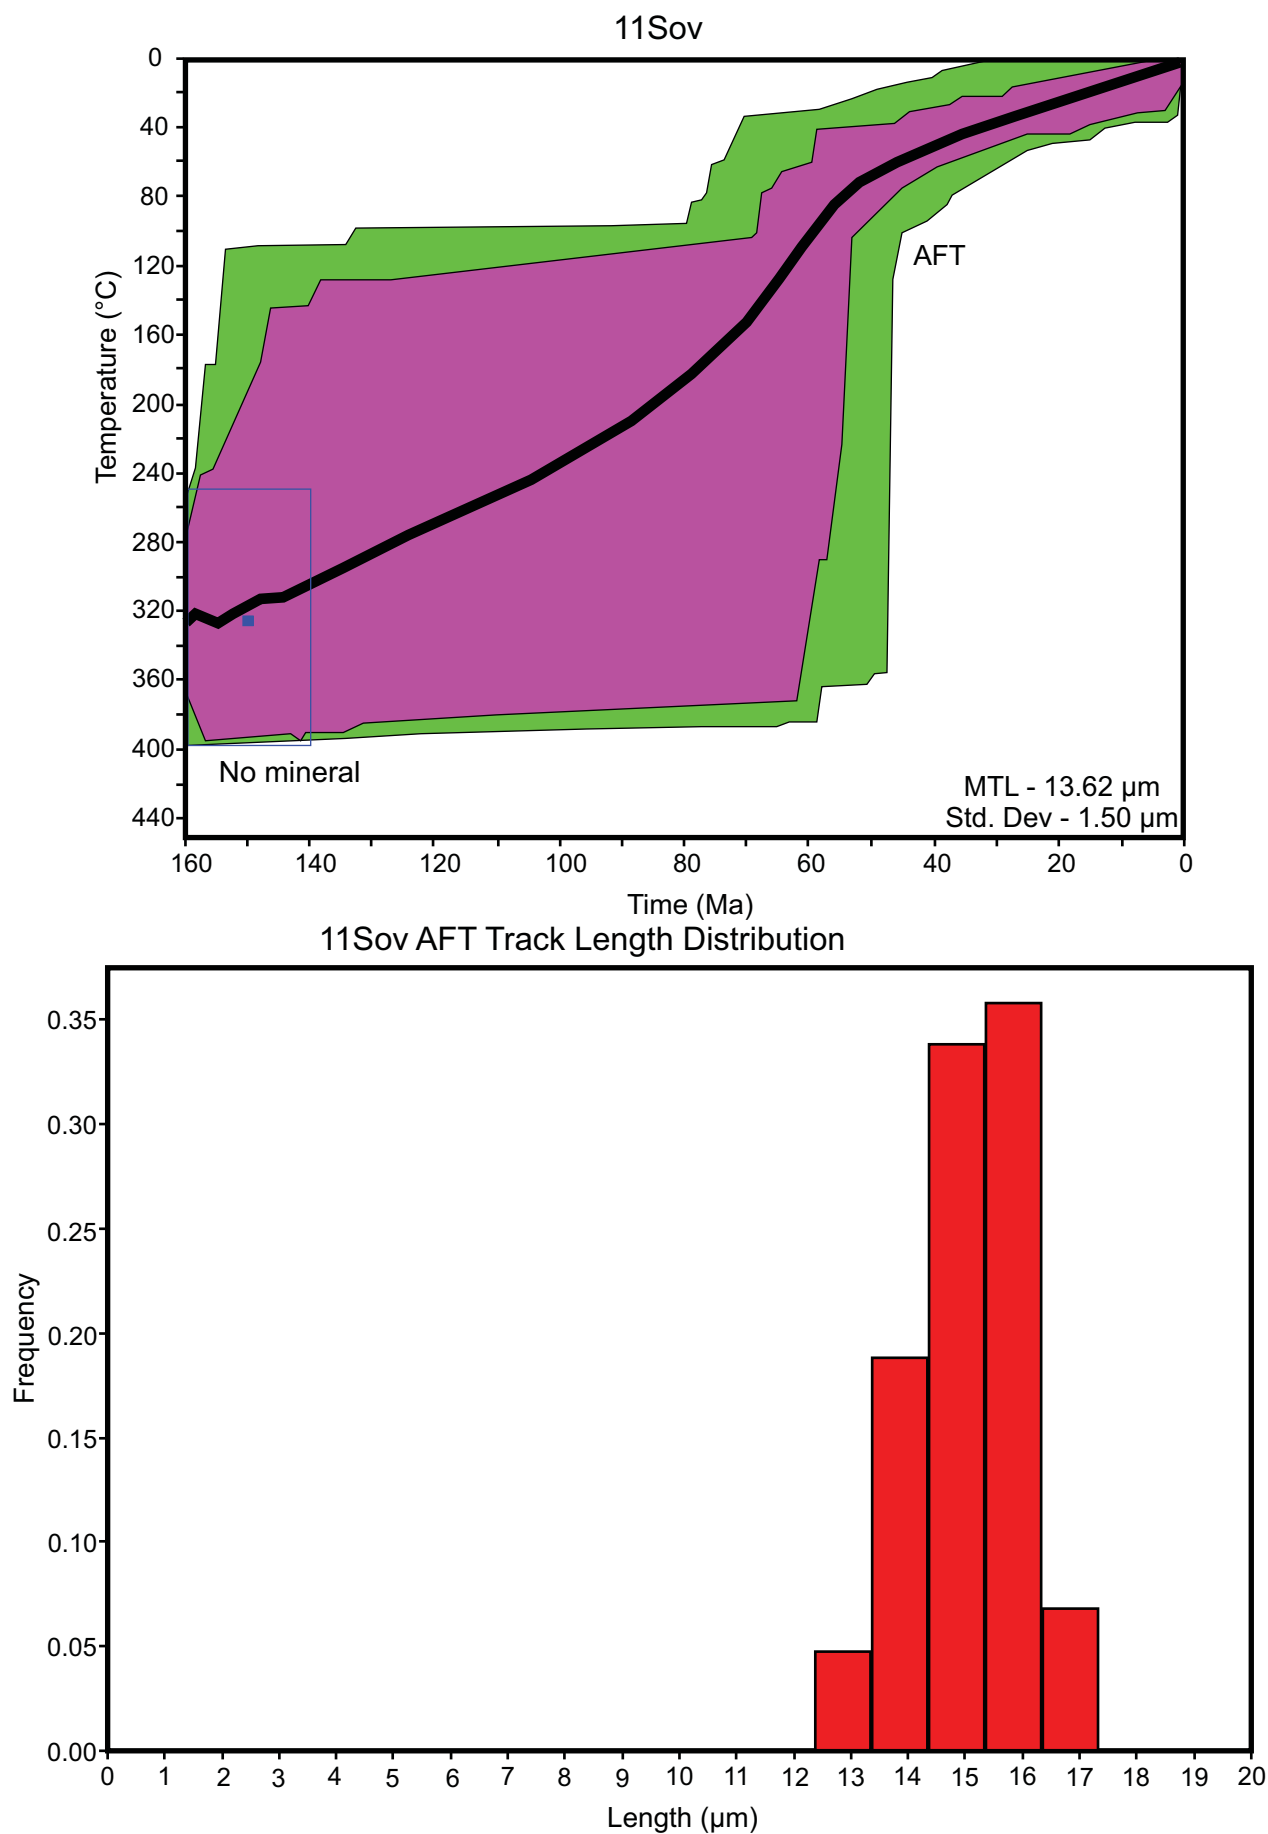

Patrick Terhune, Figure DR6.7



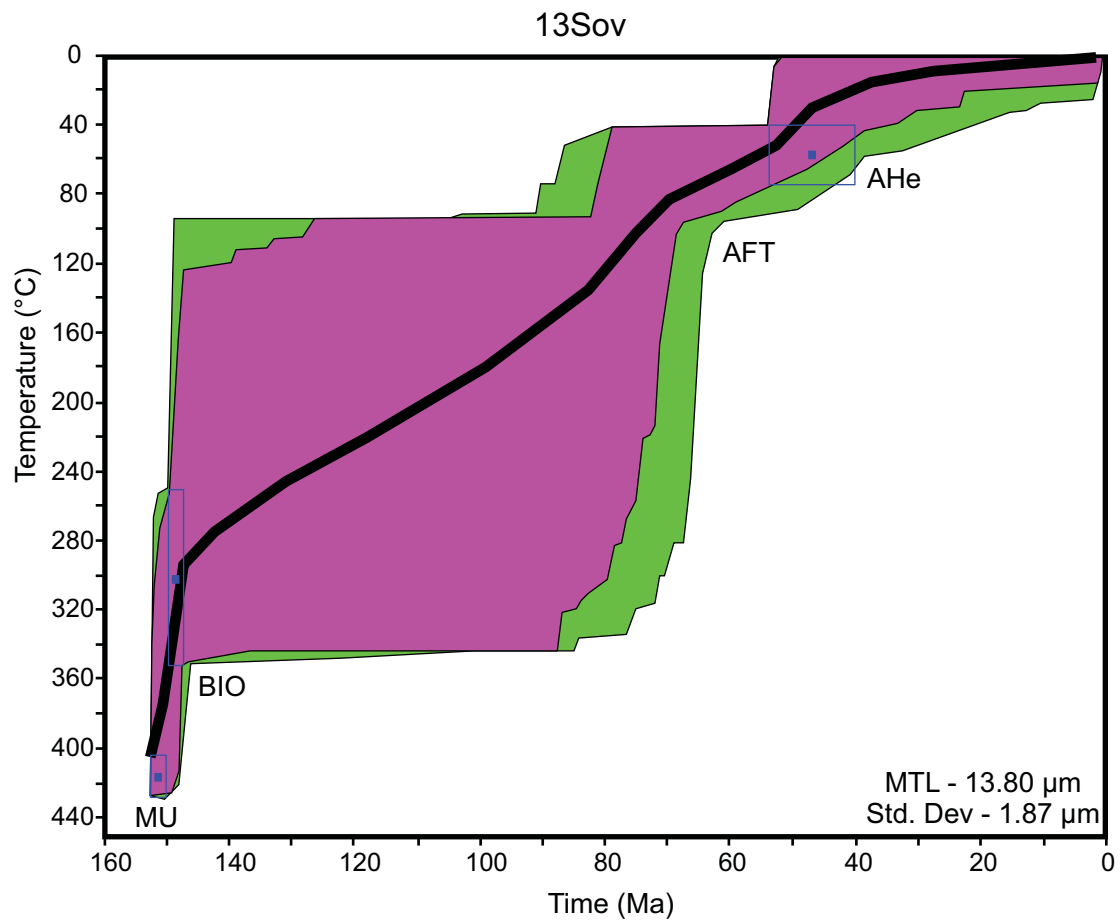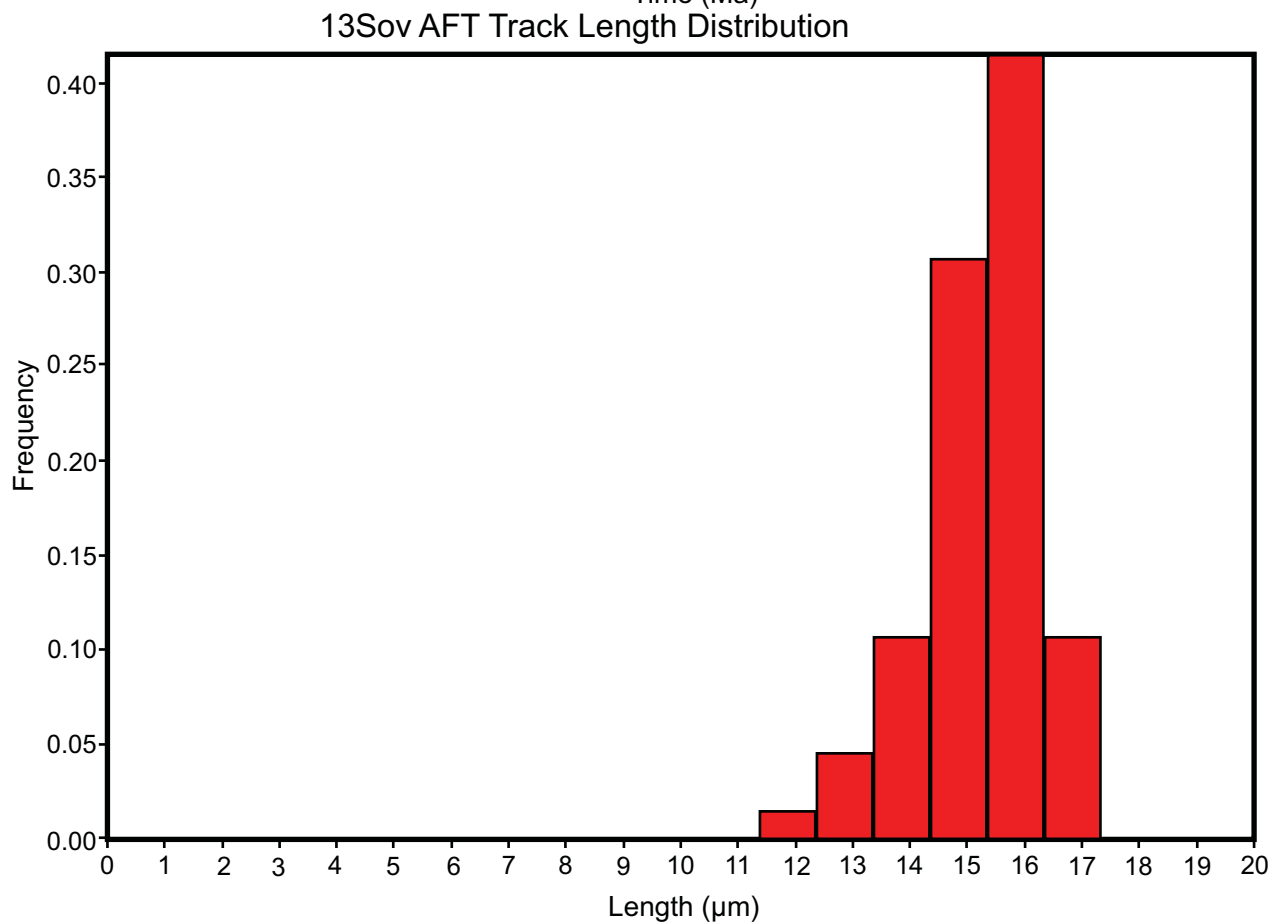

Patrick Terhune, Figure DR6.9

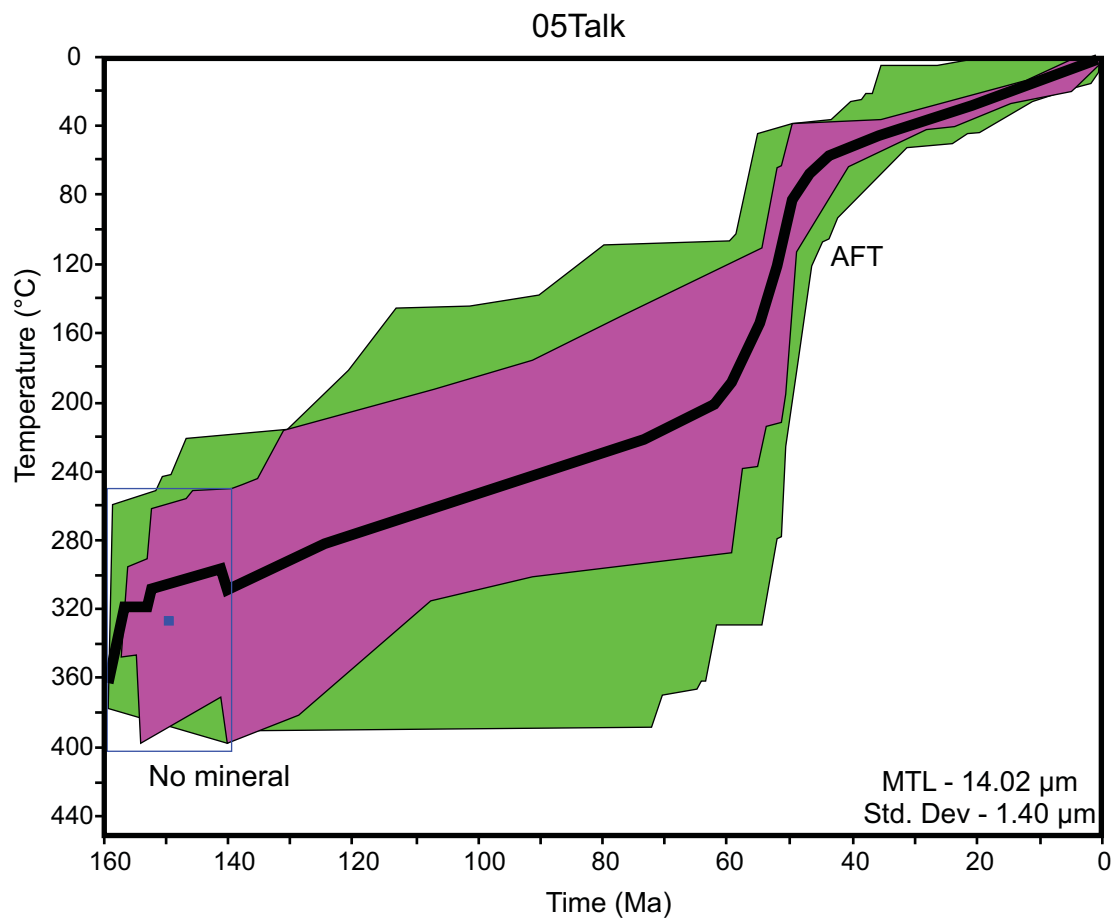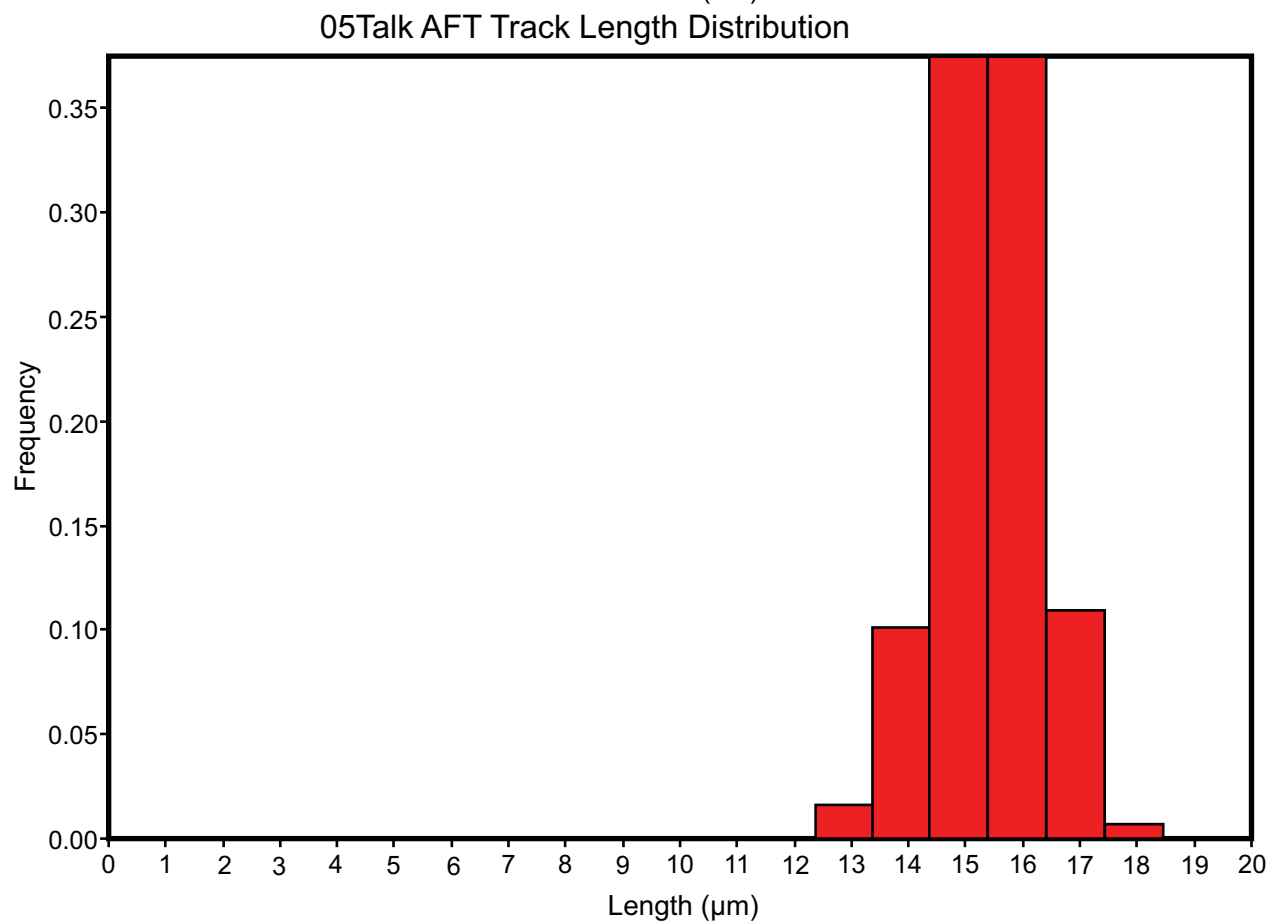

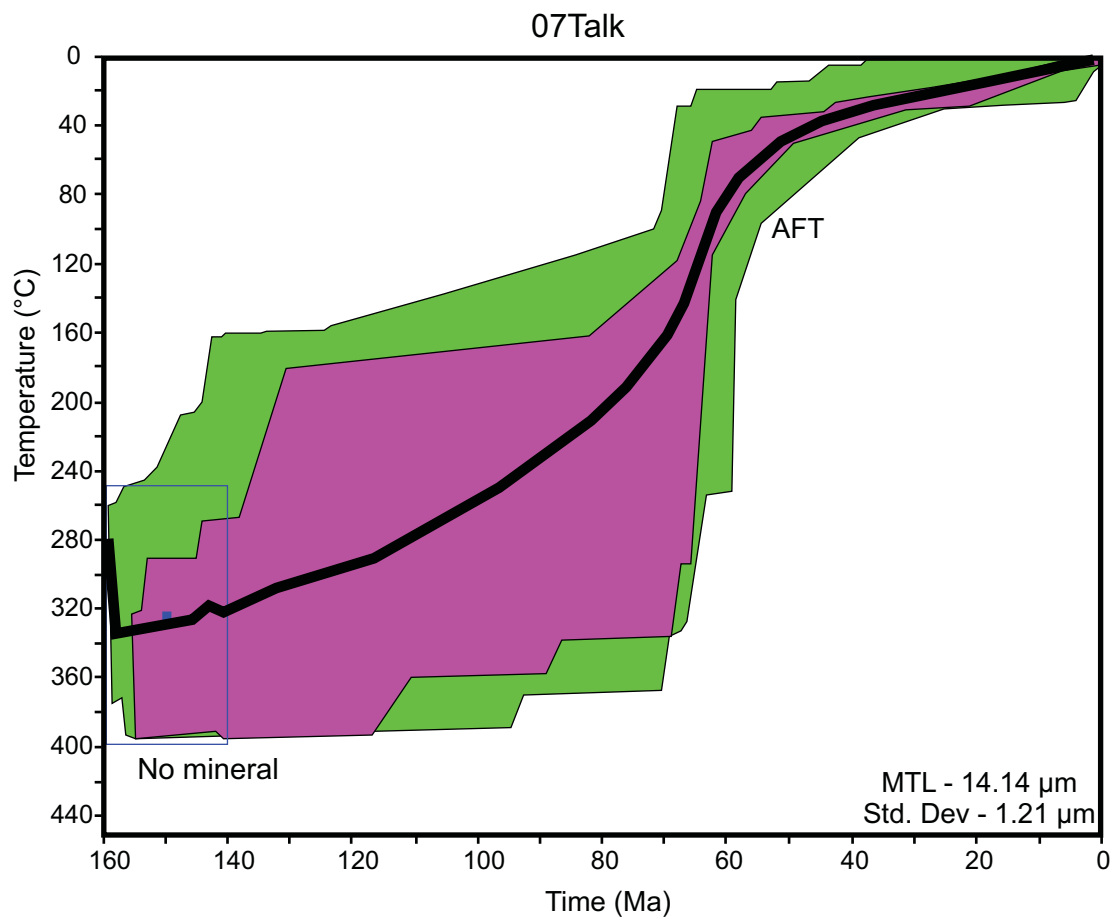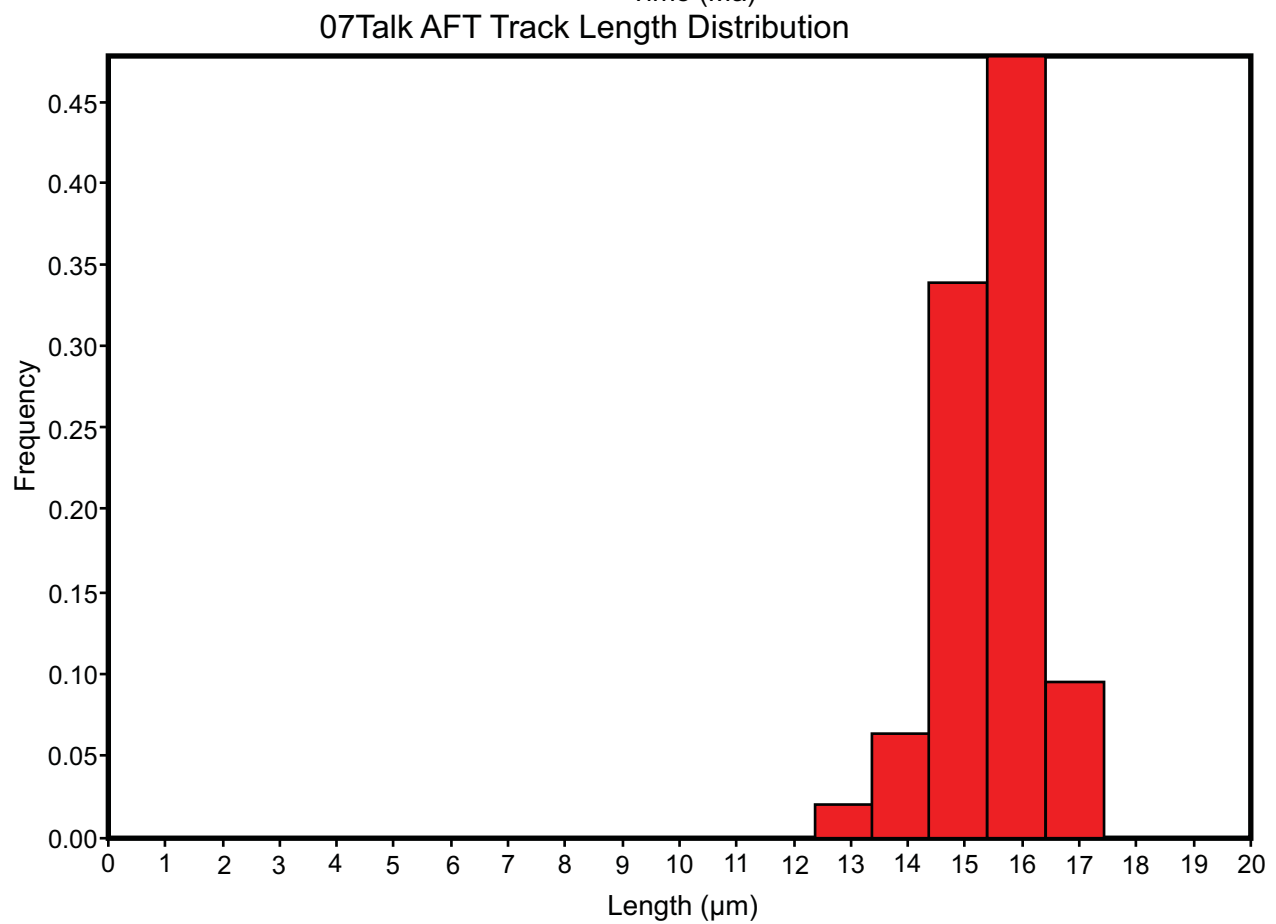

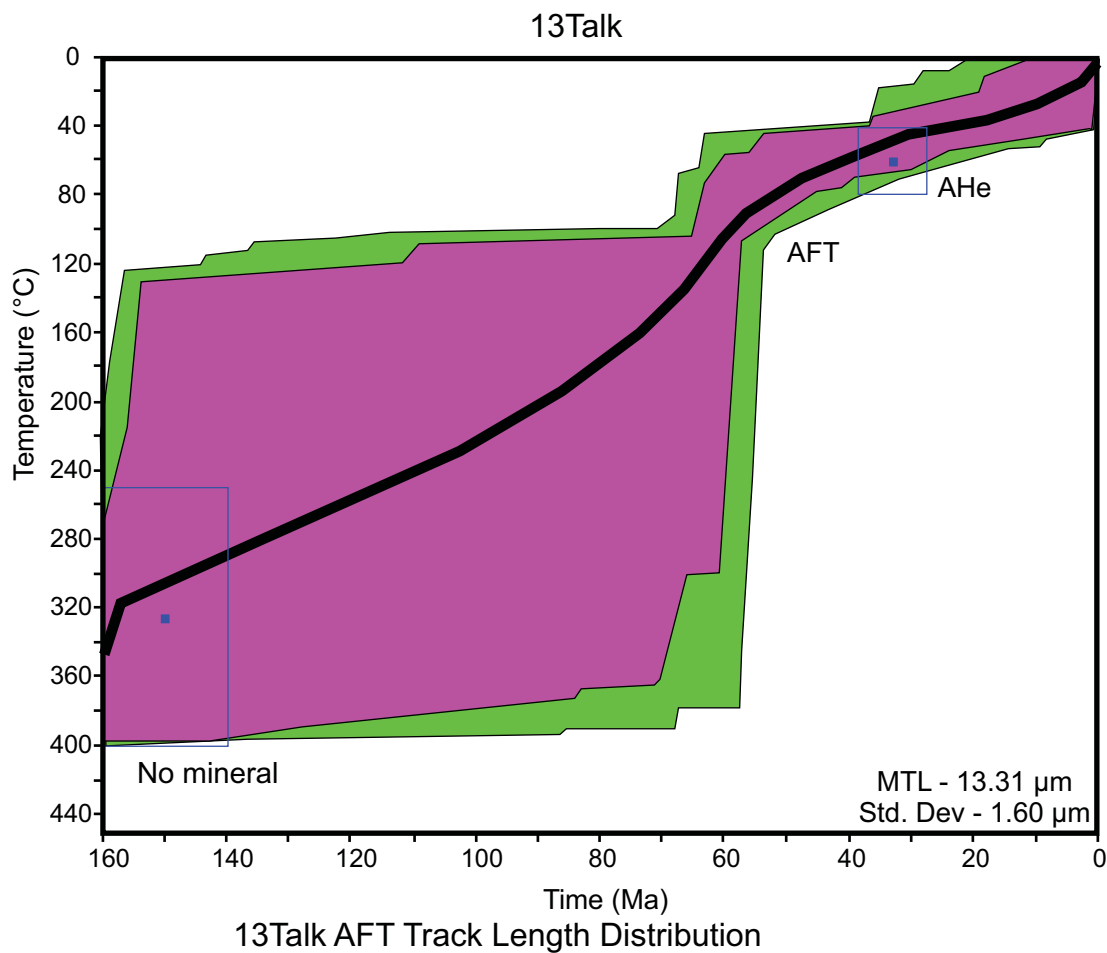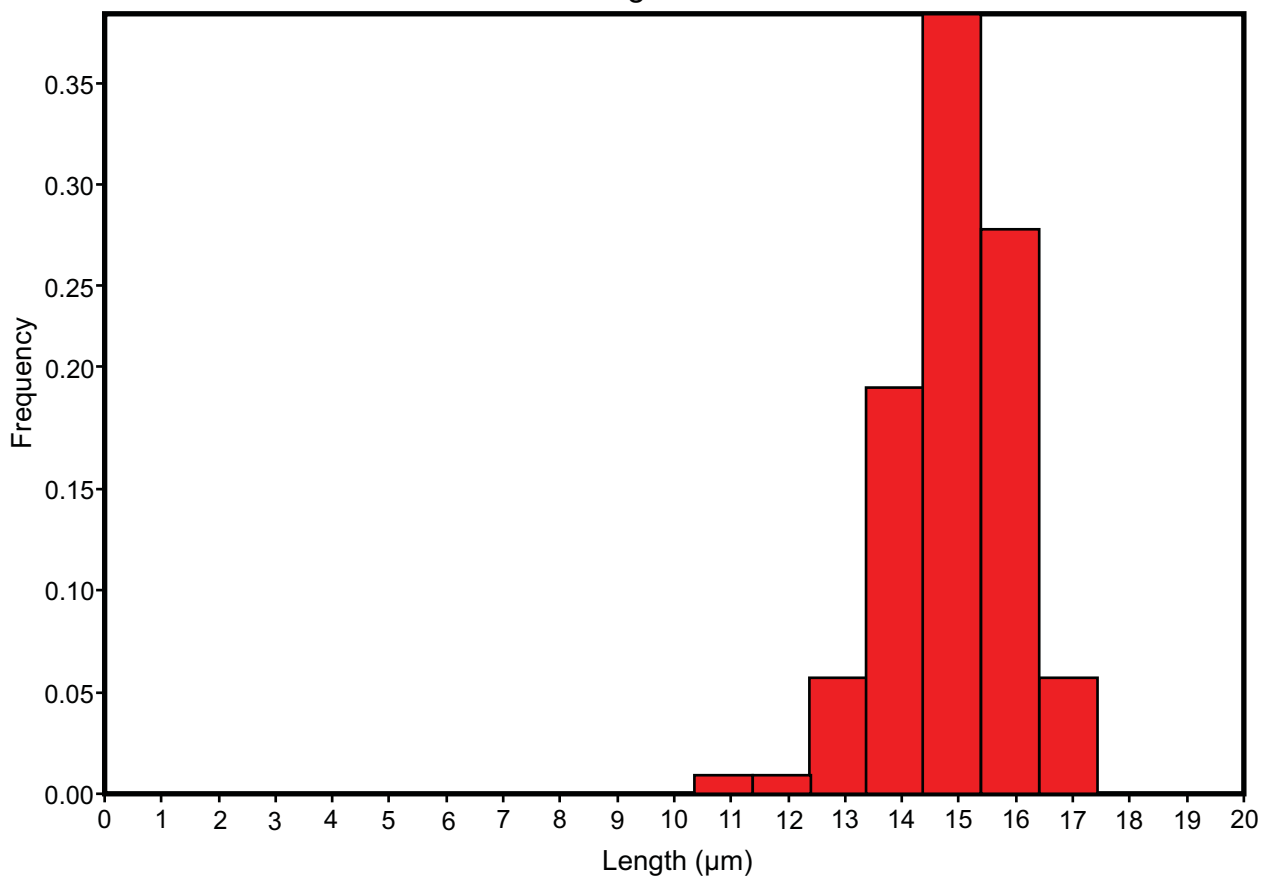

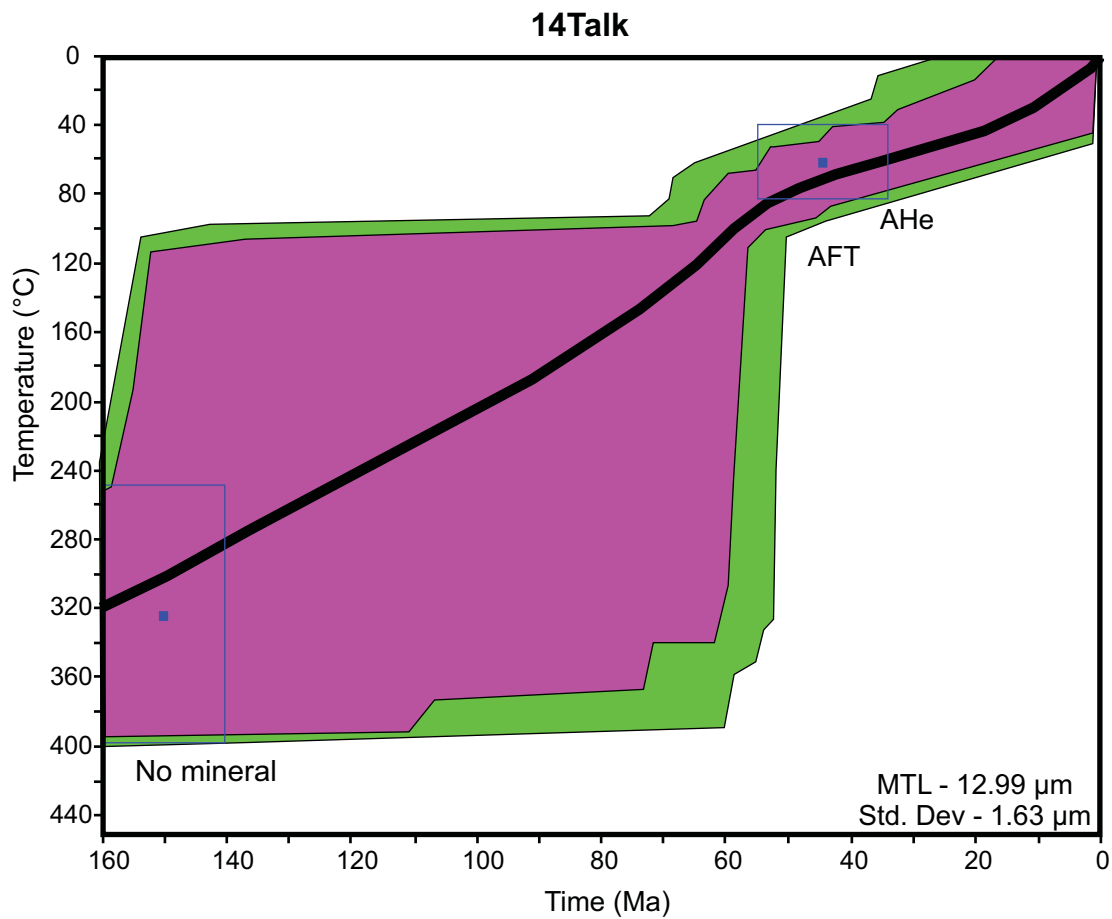

**14Talk AFT Track Length Distribution**

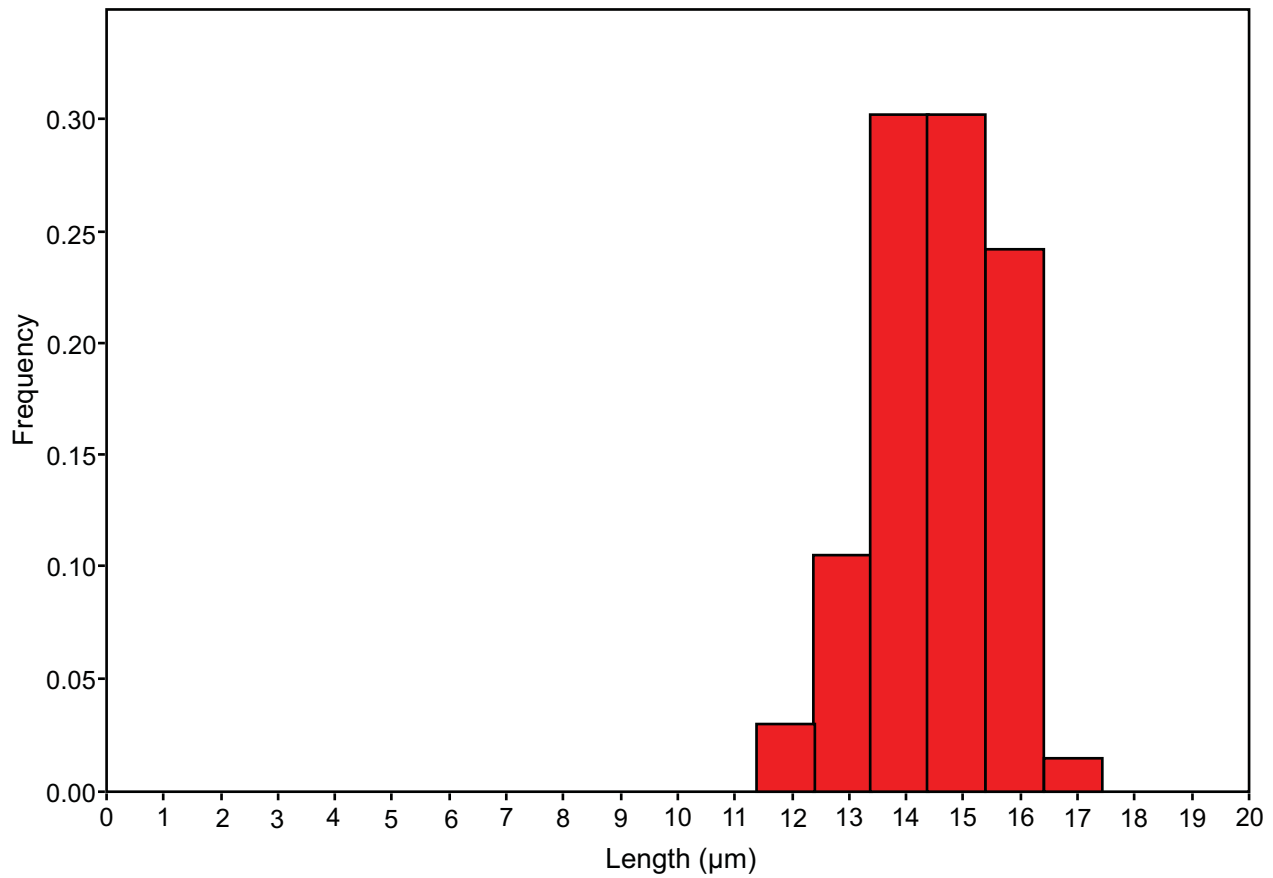

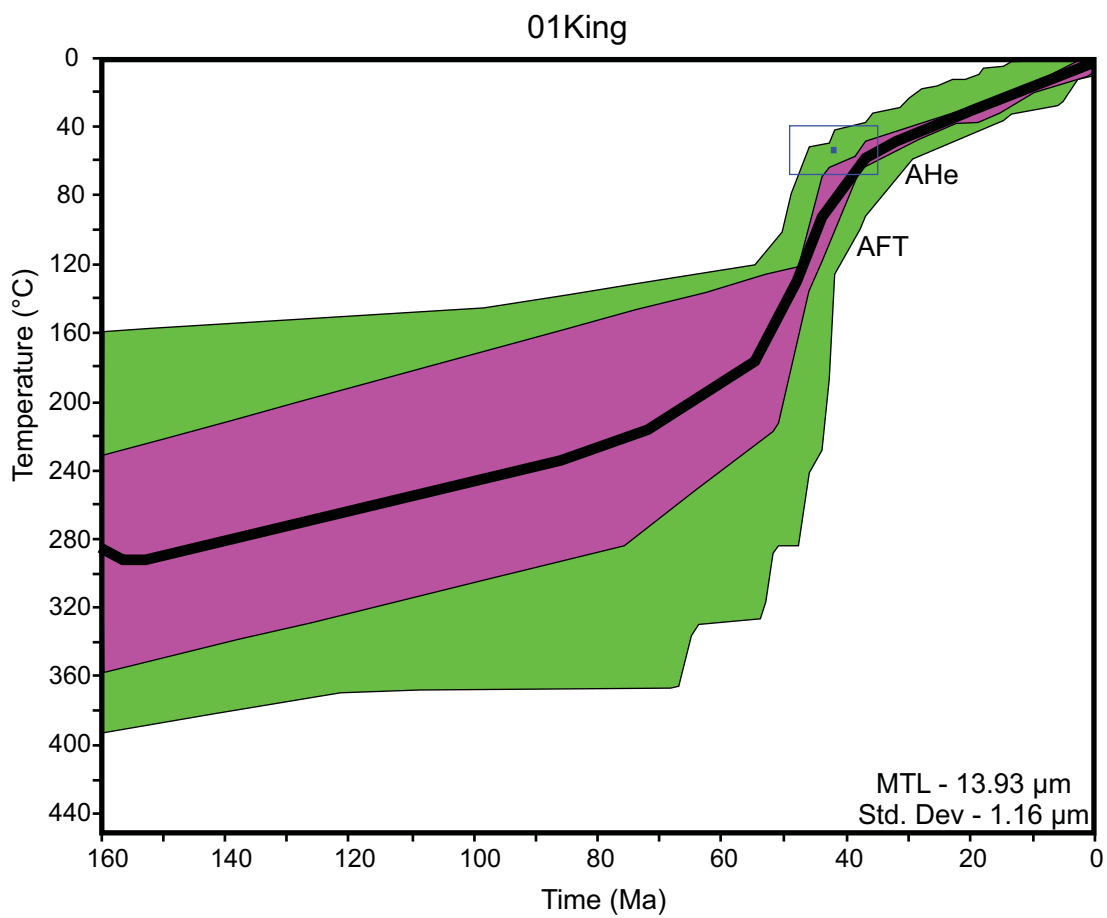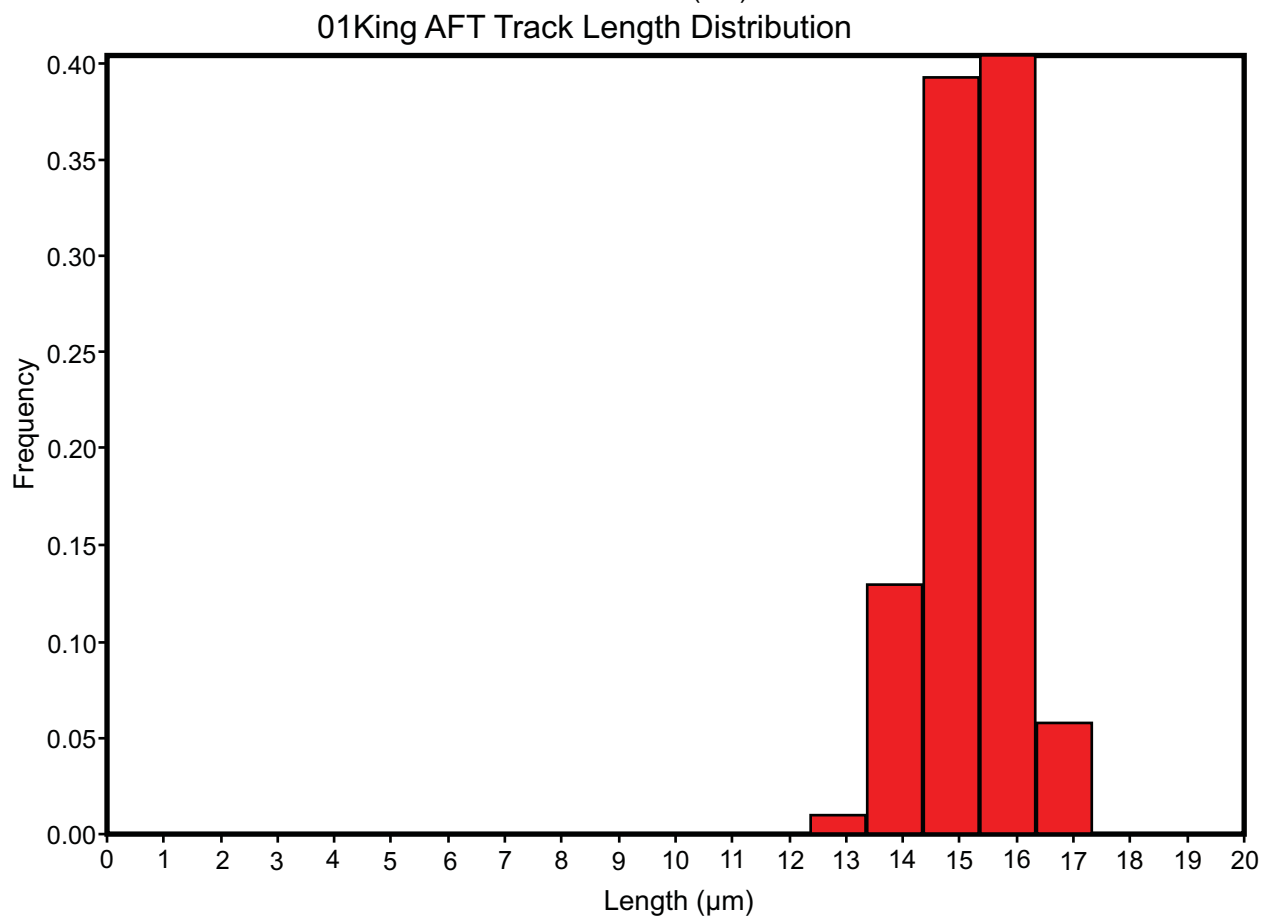

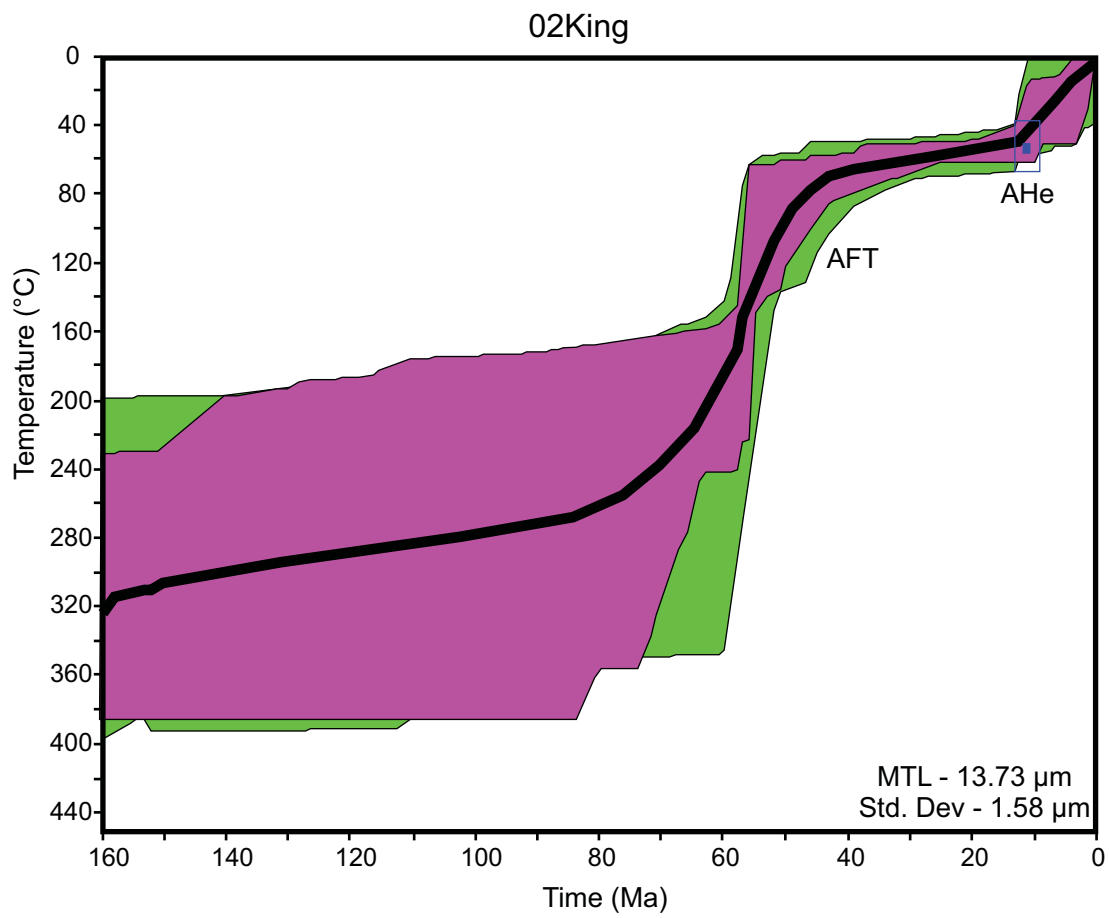

02King AFT Track Length Distribution

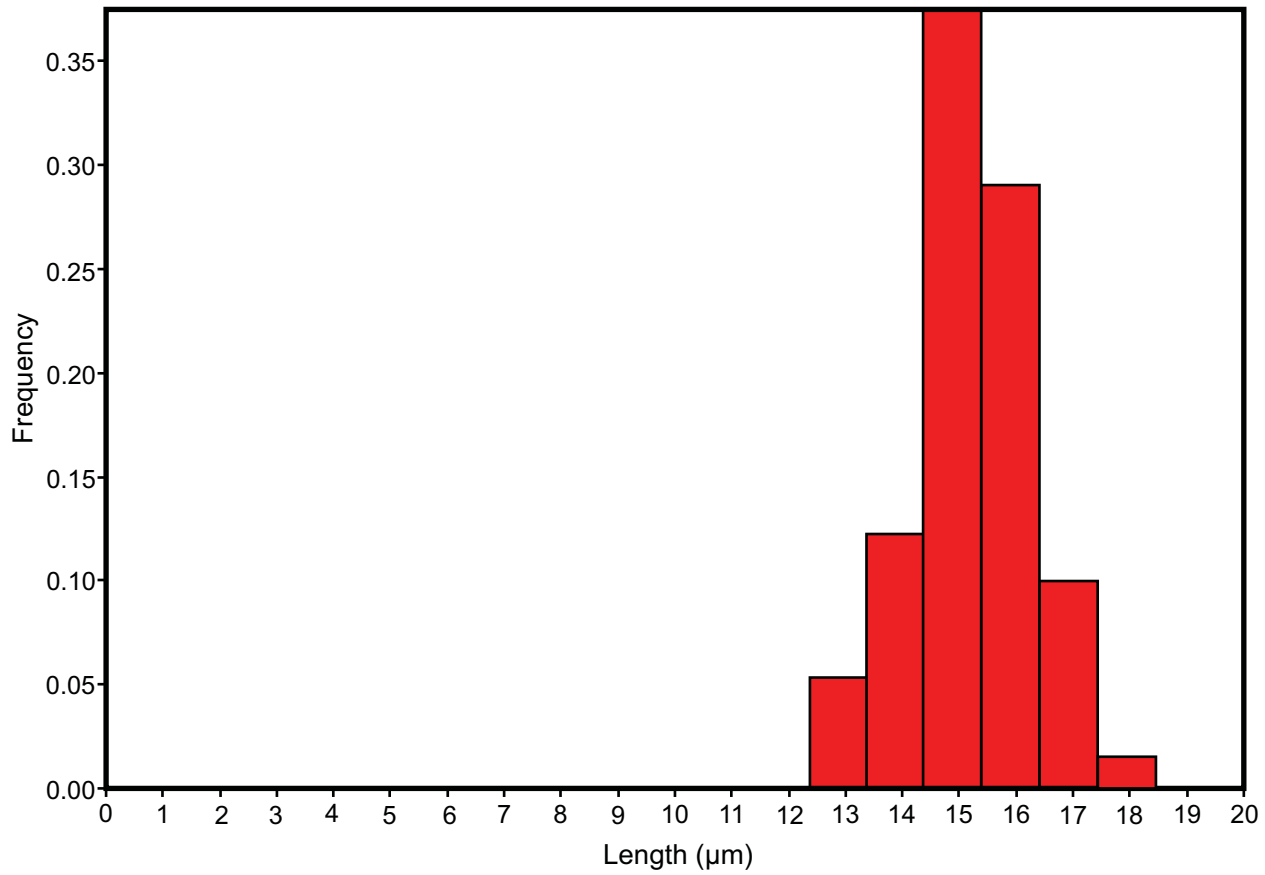

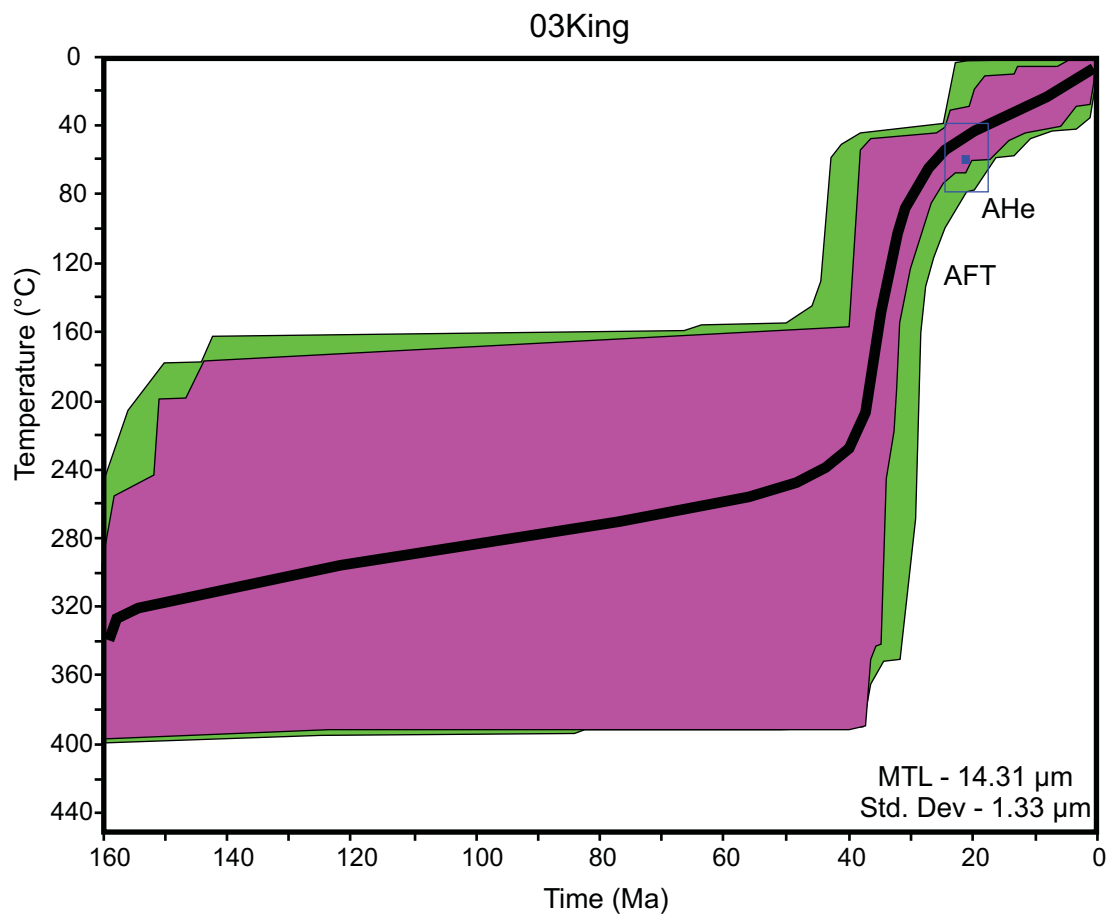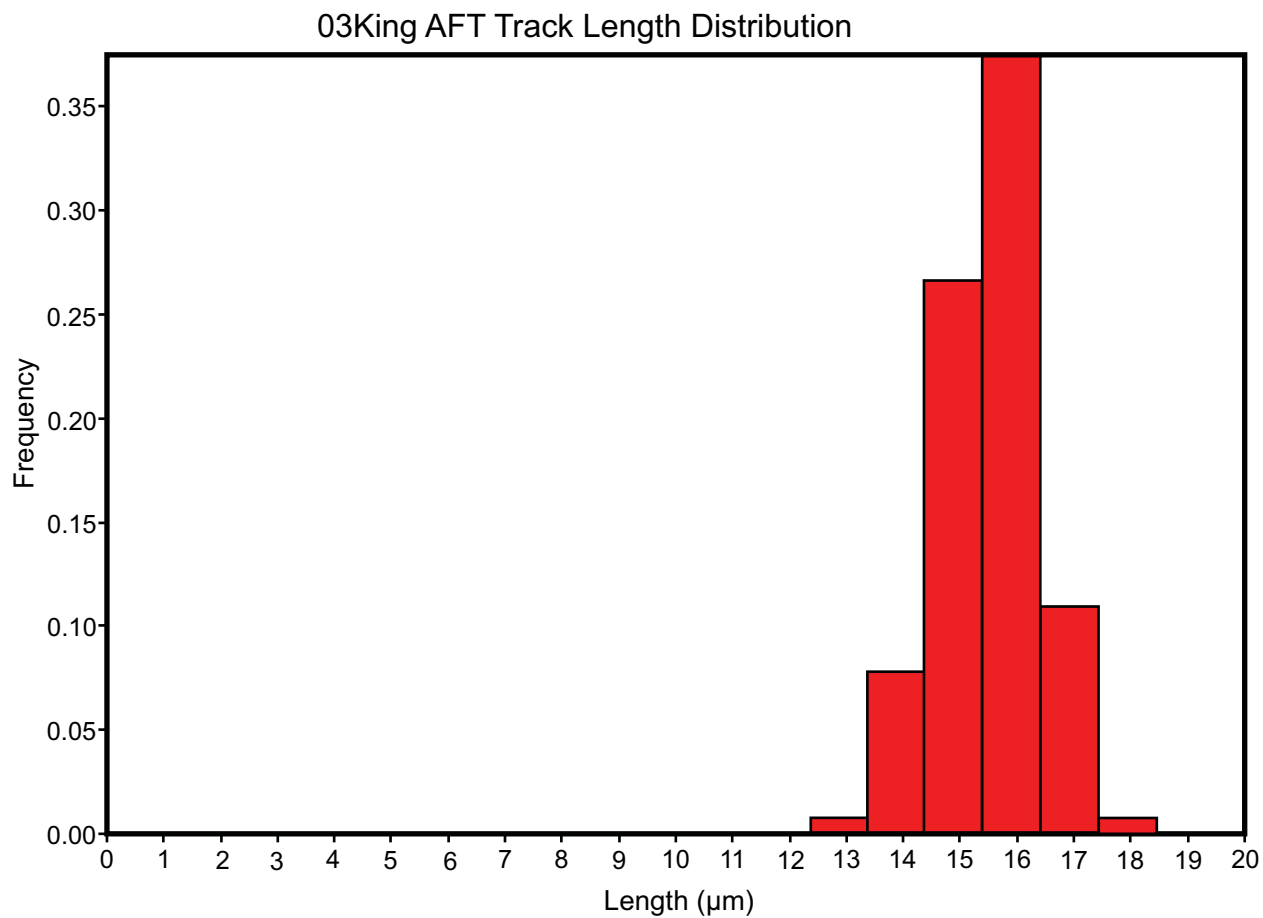

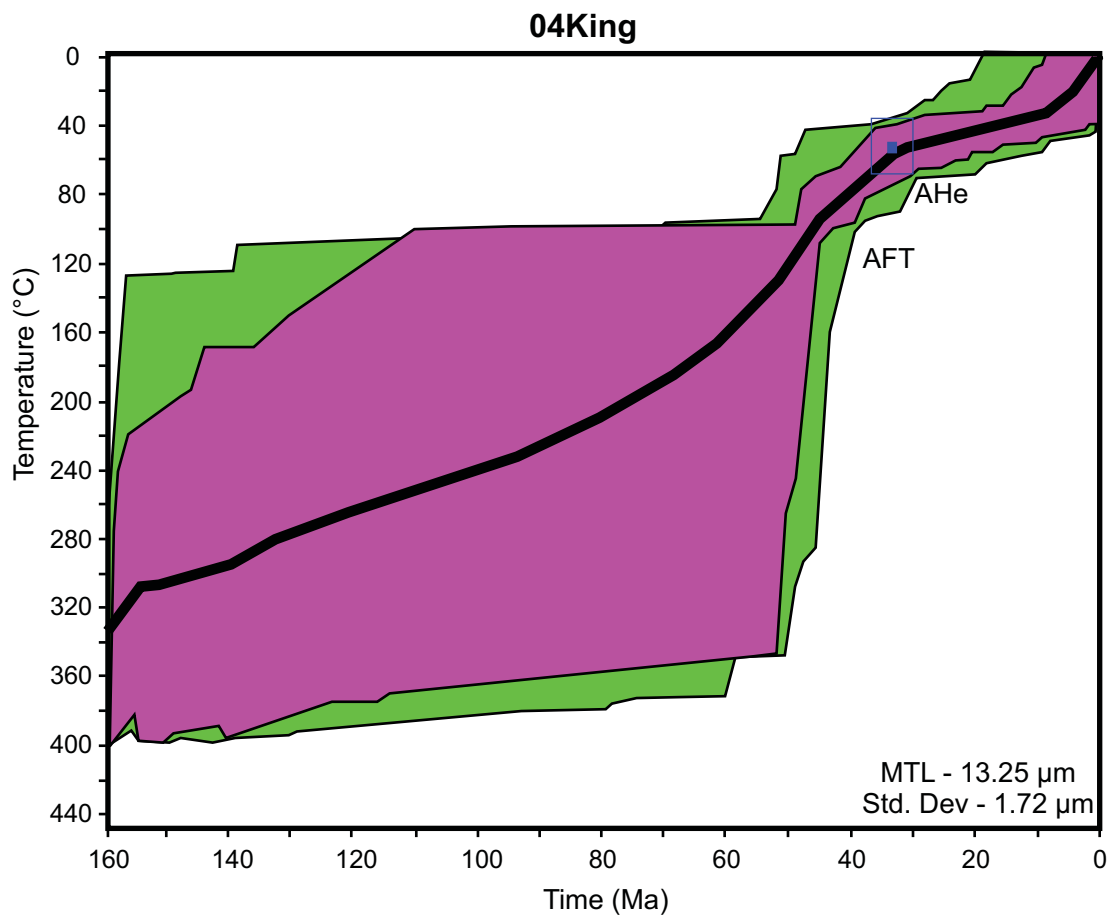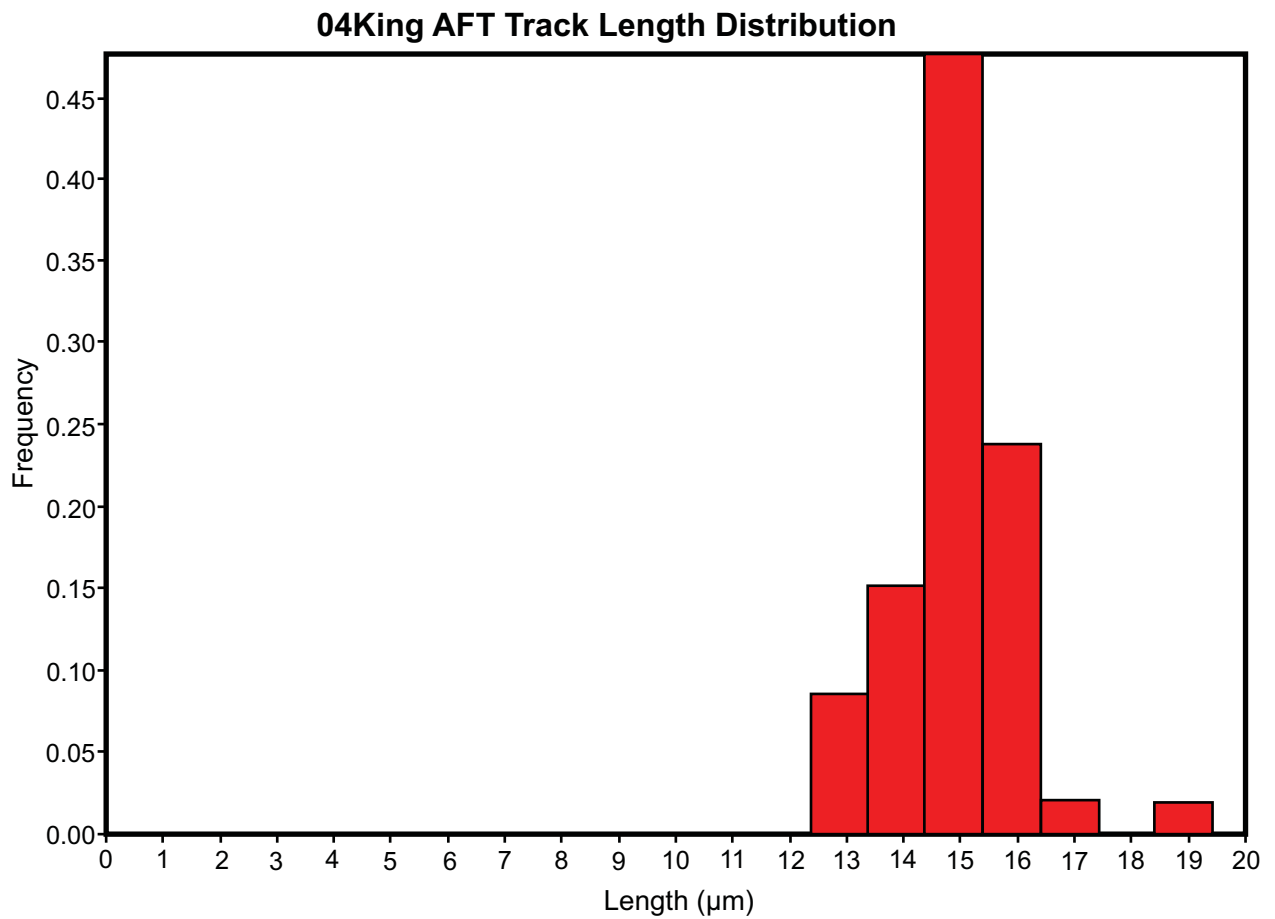

Patrick Terhune, Figure DR6.17

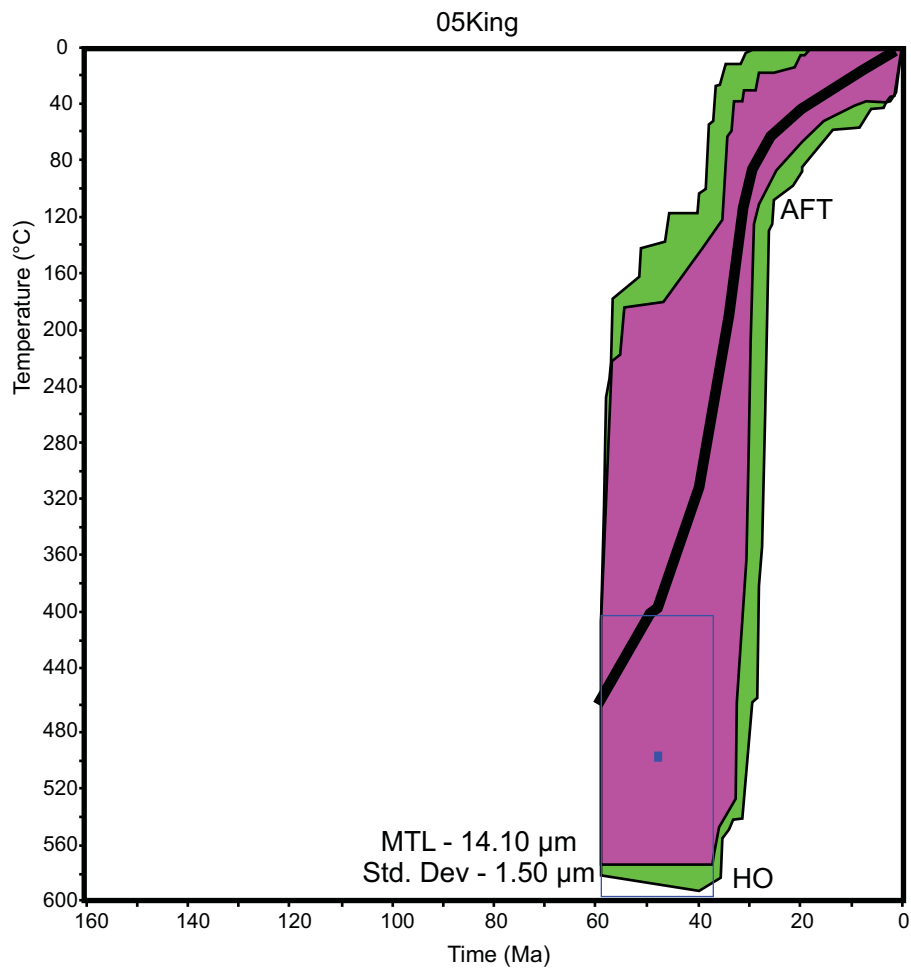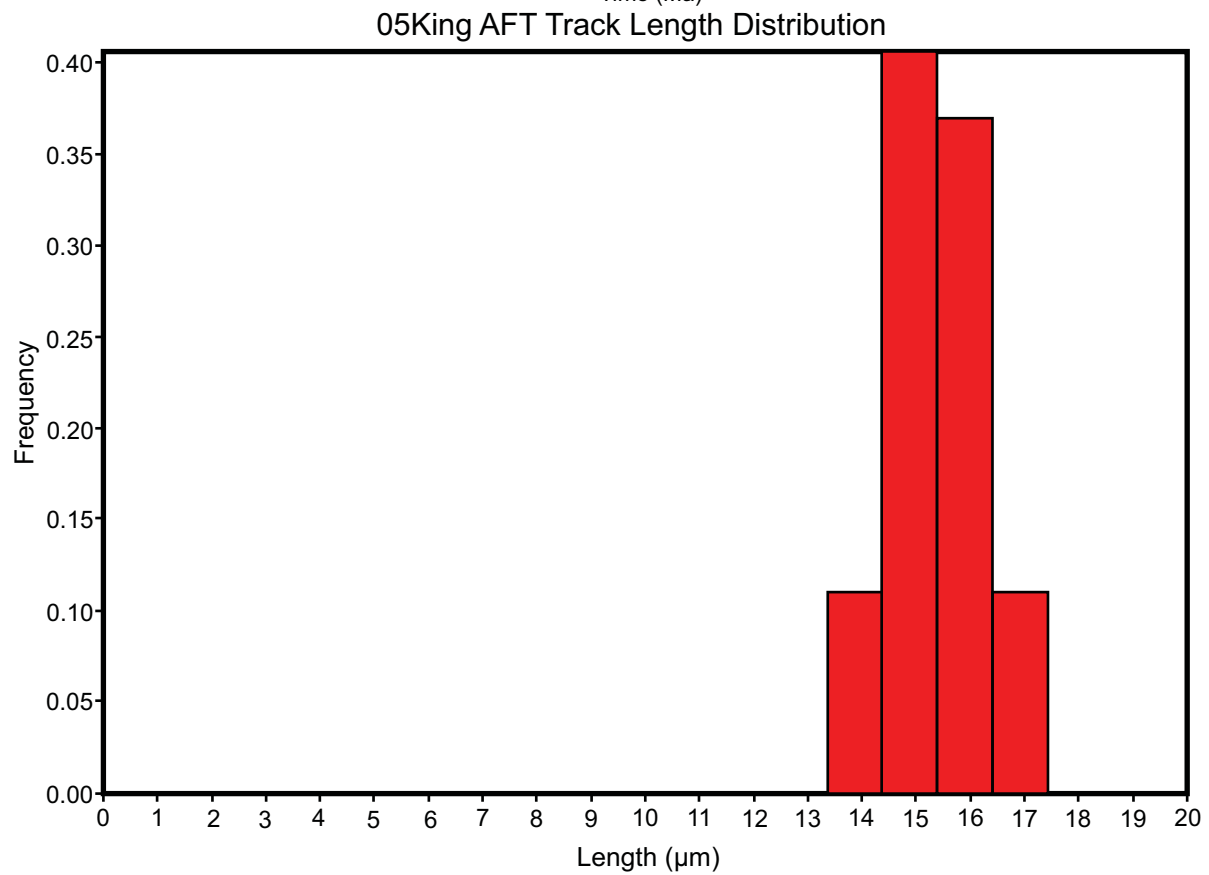

Patrick Terhune, Figure DR6.18

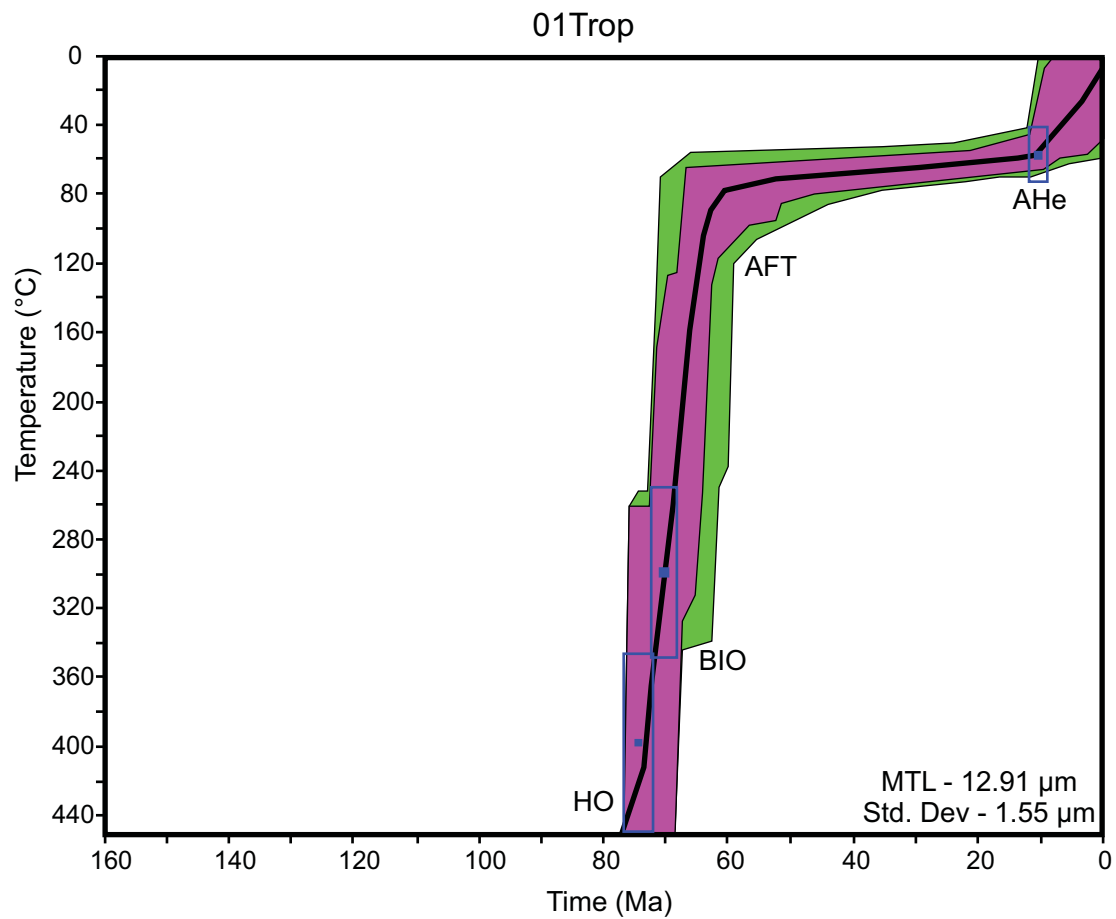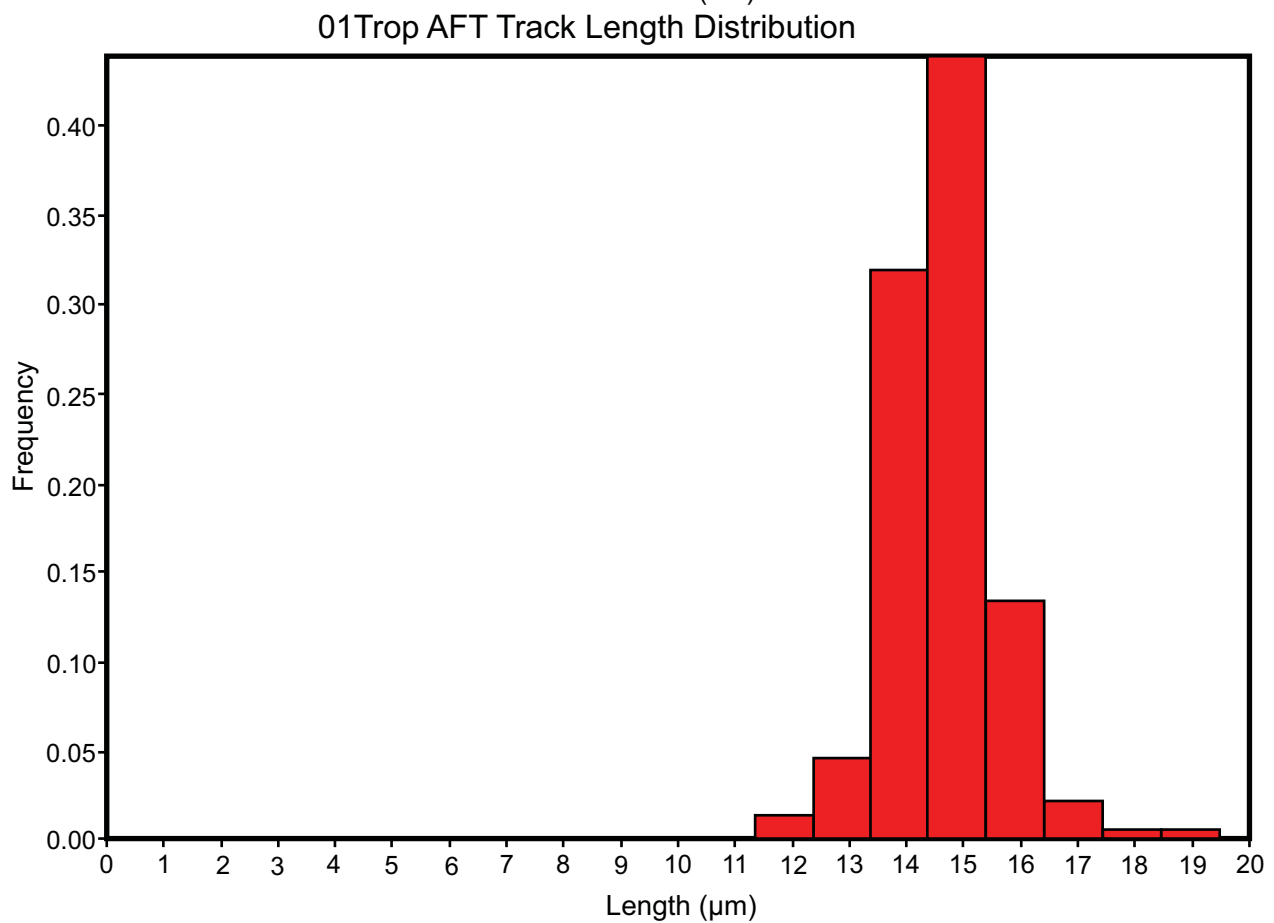

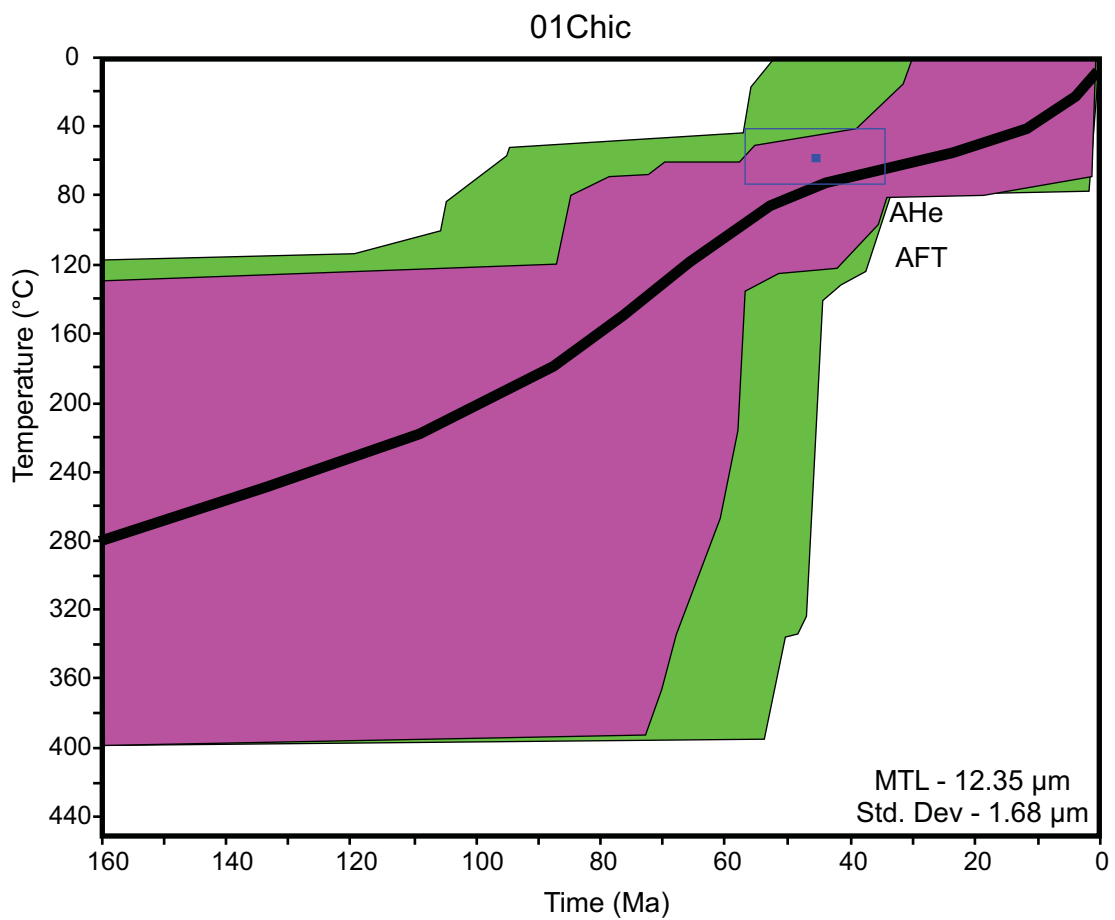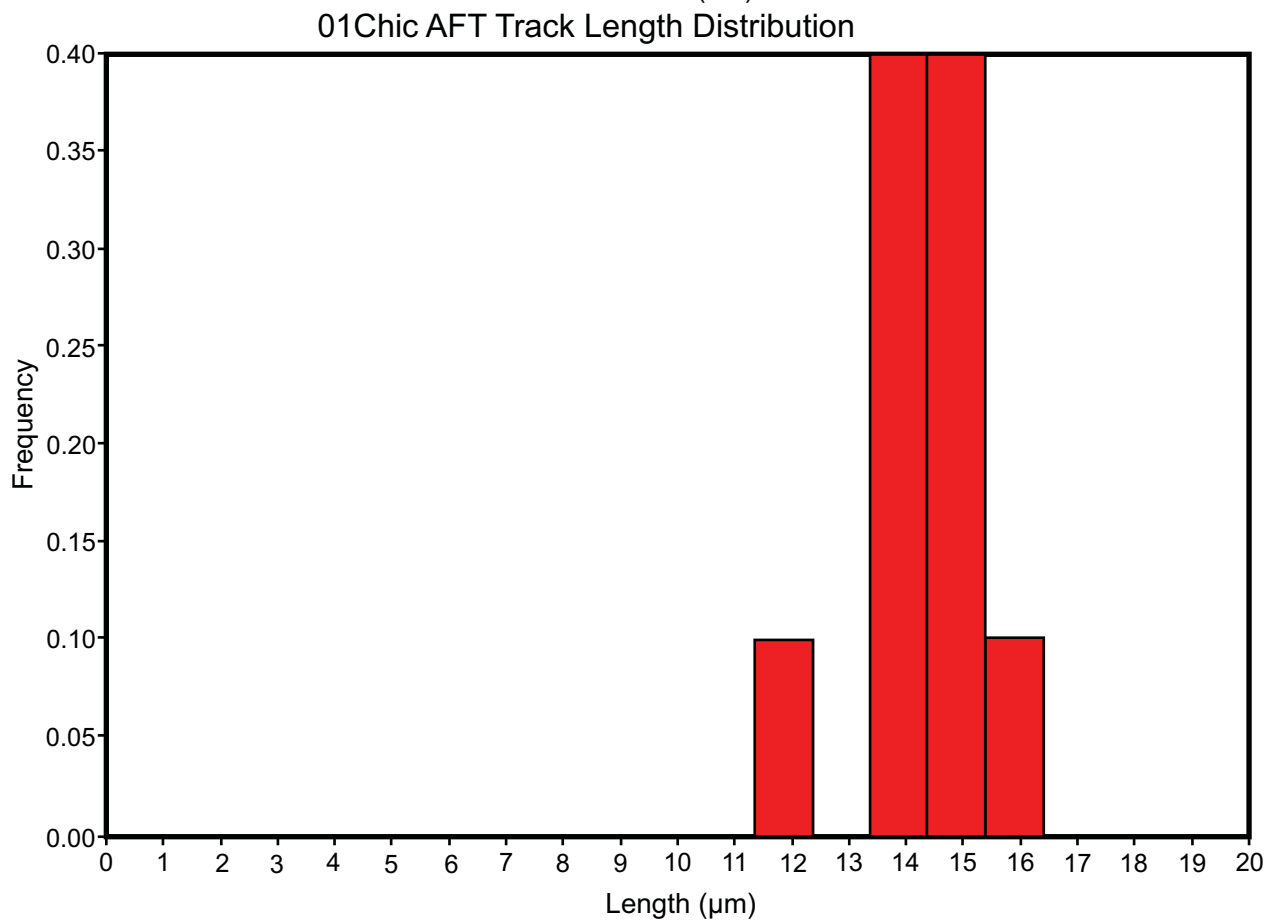

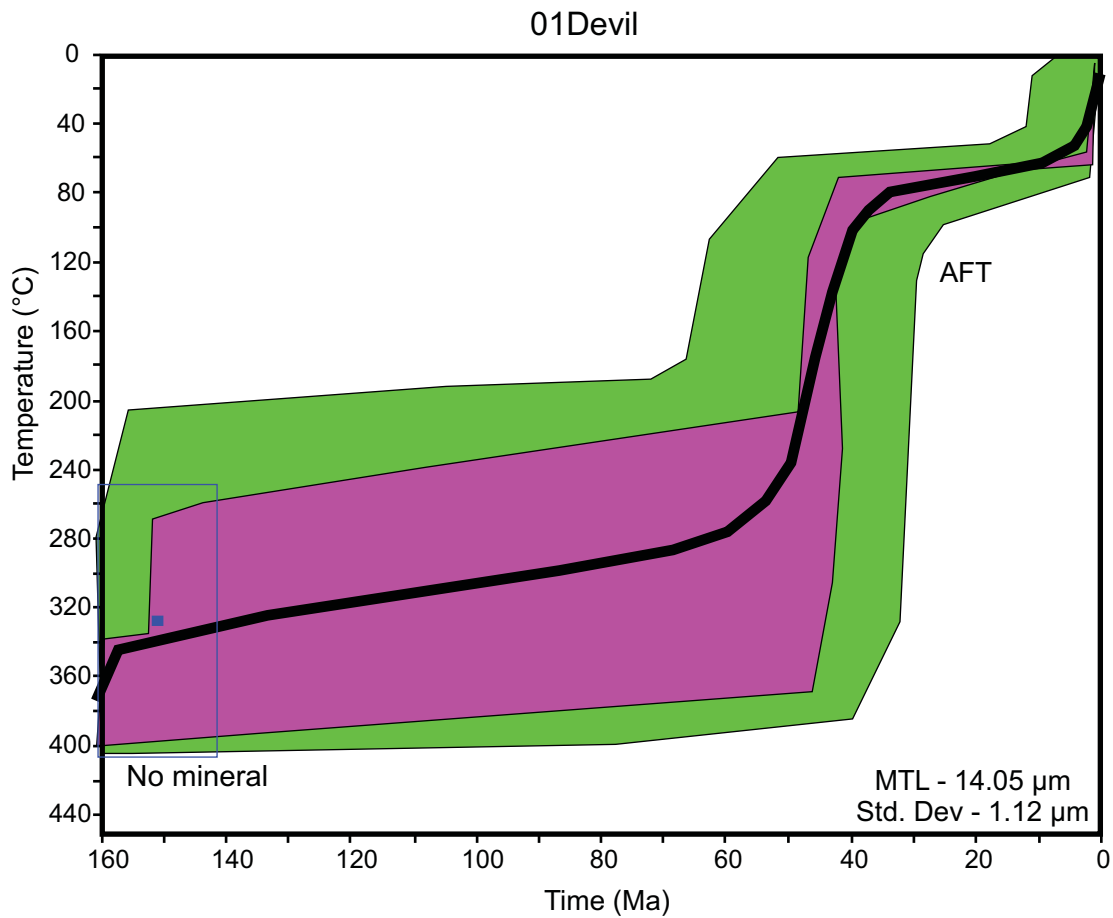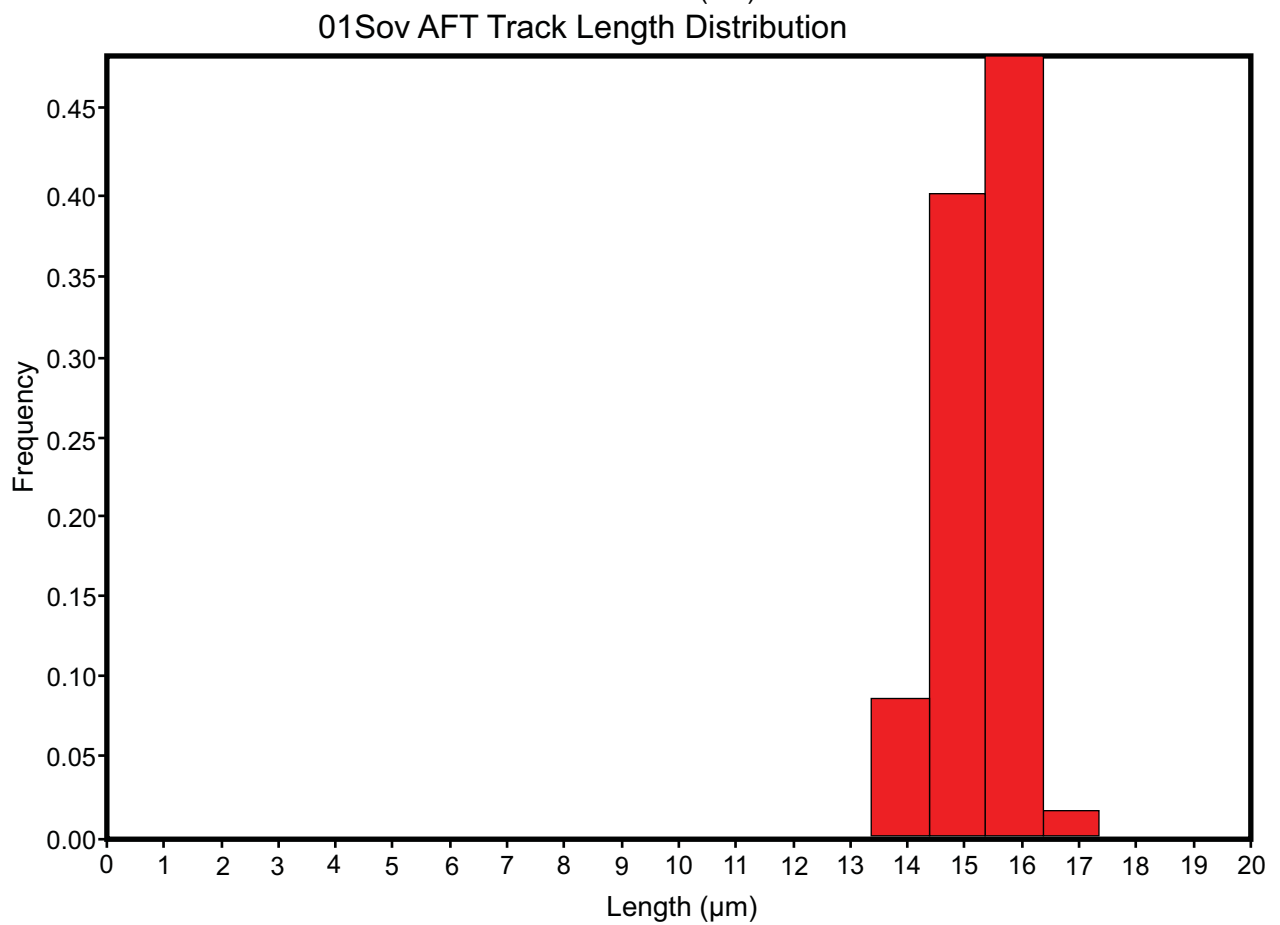

Supplement: Supplementary file 8 [file 22411770]
