# Supplementary material
Source: publisher figshare collection journal article supplement (https://gsapubs.figshare.com/ndownloader/files/22411770)
Supplement: Supplementary file 13 [file 22411770]

A) Jurassic

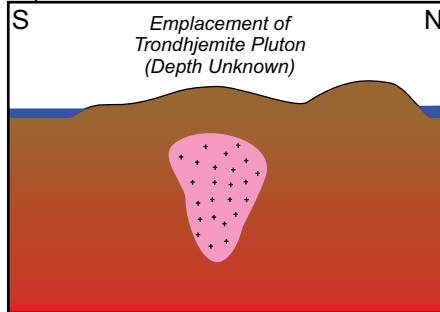

E) Late Eocene - Oligocene

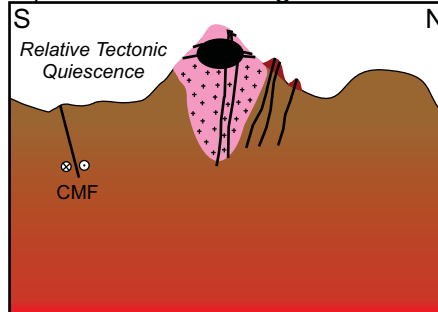

B) Cretaceous - Early Paleocene

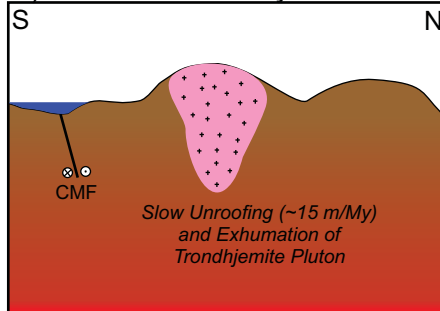

F) Miocene - Present

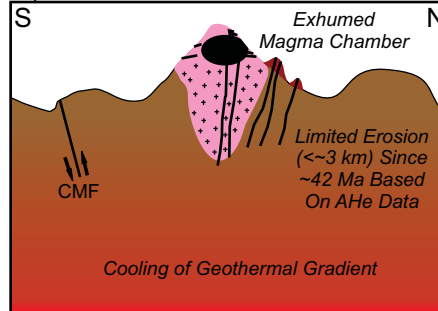

C) Middle Paleocene

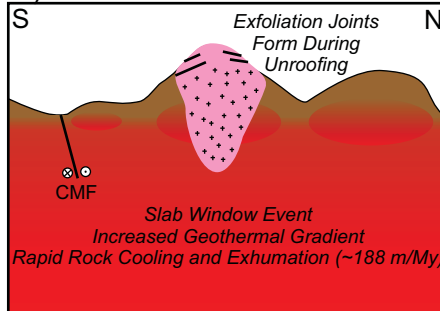

G) Present

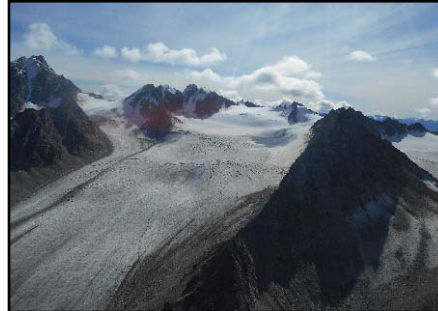

D) Late Paleocene - Eocene

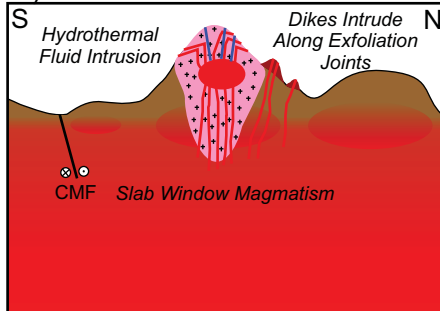

Patrick Terhune DR10
