# Supplementary material
Source: publisher figshare collection journal article supplement (https://gsapubs.figshare.com/ndownloader/files/22411770)
Supplement: Supplementary file 19 [file 22411770]

DR4. <sup>40</sup>Ar/<sup>39</sup>Ar Data For Samples From The Southern Talkeetna Mountains

L=laser

| 05King HO#1                                                |            |           |          |           |         |           |         |          |          |          |         |          |         |          |          |        |        |
|------------------------------------------------------------|------------|-----------|----------|-----------|---------|-----------|---------|----------|----------|----------|---------|----------|---------|----------|----------|--------|--------|
| Weighted average of J from standards = 5.570e-03 1.672e-05 |            |           |          |           |         |           |         |          |          |          |         |          |         |          |          |        |        |
| Laser Power                                                | Cumulative | 40Ar/39Ar | +/-      | 37Ar/39Ar | +/-     | 36Ar/39Ar | +/-     | % Atm.   | +/-      | Ca/K     | +/-     | Cl/K     | +/-     | 40*/39K  | +/-      | Age    | +/-    |
| (mW)                                                       | 39Ar       | meas.     |          | meas.     |         | meas.     |         | 40Ar     |          |          |         |          |         |          |          | (Ma)   | (Ma)   |
| 500                                                        | 0.022      | 339.75173 | 51.84288 | 12.32584  | 1.88727 | 1.09486   | 0.1838  | 94.9345  | 6.67554  | 22.81482 | 3.52397 | 0.08589  | 0.02342 | 17.35975 | 23.03524 | 166.34 | 210.84 |
| 1000                                                       | 0.0484     | 59.56567  | 5.53678  | 5.10782   | 0.49078 | 0.17342   | 0.0612  | 85.36899 | 29.32064 | 9.40608  | 0.90704 | 0.01915  | 0.00931 | 8.74226  | 17.54041 | 85.69  | 167.9  |
| 1500                                                       | 0.0704     | 33.52787  | 3.90693  | 19.04461  | 2.21377 | 0.04748   | 0.0759  | 37.19336 | 66.77993 | 35.42064 | 4.17347 | 0.09197  | 0.0189  | 21.32616 | 22.8172  | 202.29 | 204.72 |
| 2000                                                       | 0.1919     | 9.60396   | 0.22654  | 25.83471  | 0.61465 | 0.01485   | 0.01297 | 23.59911 | 40.02859 | 48.28408 | 1.1701  | 0.20875  | 0.00577 | 7.45118  | 3.90825  | 73.29  | 37.67  |
| 2500                                                       | 0.4422     | 8.33093   | 0.14055  | 25.17005  | 0.41908 | 0.01964   | 0.00685 | 44.91895 | 24.37212 | 47.01937 | 0.79703 | 0.21851  | 0.0046  | 4.65545  | 2.06186  | 46.14  | 20.17  |
| 3000                                                       | 0.6771     | 9.56367   | 0.14434  | 26.40699  | 0.39484 | 0.02328   | 0.00667 | 49.32458 | 20.63771 | 49.37397 | 0.75227 | 0.21483  | 0.00362 | 4.92348  | 2.00692  | 48.76  | 19.61  |
| 5000                                                       | 0.9273     | 9.8004    | 0.1573   | 30.77286  | 0.49459 | 0.02567   | 0.00736 | 51.65787 | 22.23617 | 57.71831 | 0.94827 | 0.19371  | 0.00362 | 4.82861  | 2.22282  | 47.83  | 21.73  |
| 9000                                                       | 1          | 13.65613  | 0.50079  | 32.88802  | 1.18219 | 0.03023   | 0.01964 | 45.66046 | 42.5212  | 61.77989 | 2.27355 | 0.22513  | 0.00972 | 7.58099  | 5.93981  | 74.54  | 57.21  |
|                                                            |            |           |          |           |         |           |         |          |          |          |         |          |         |          |          |        |        |
| Integrated                                                 |            | 18.63542  | 0.16869  | 26.57672  | 0.24493 | 0.05023   | 0.00463 | 67.99789 | 7.31351  | 49.69738 | 0.46677 | 0.19978  | 0.00222 | 6.0683   | 1.38816  | 59.91  | 13.48  |
| 01Sov MU#1                                                 |            |           |          |           |         |           |         |          |          |          |         |          |         |          |          |        |        |
| Weighted average of J from standards = 5.570e-03 1.672e-05 |            |           |          |           |         |           |         |          |          |          |         |          |         |          |          |        |        |
| Laser Power                                                | Cumulative | 40Ar/39Ar | +/-      | 37Ar/39Ar | +/-     | 36Ar/39Ar | +/-     | % Atm.   | +/-      | Ca/K     | +/-     | Cl/K     | +/-     | 40*/39K  | +/-      | Age    | +/-    |
| (mW)                                                       | 39Ar       | meas.     |          | meas.     |         | meas.     |         | 40Ar     |          |          |         |          |         |          |          | (Ma)   | (Ma)   |
| 500                                                        | 0.0014     | 26.63036  | 1.485    | -0.0057   | 0.06269 | 0.058     | 0.03526 | 64.42867 | 39.03067 | -0.01046 | 0.11503 | -0.00213 | 0.00821 | 9.46217  | 10.39944 | 92.56  | 99.17  |
| 1000                                                       | 0.0883     | 16.29403  | 0.06122  | 0.00137   | 0.00115 | 0.00277   | 0.00068 | 5.02322  | 1.23066  | 0.00252  | 0.00212 | 0.00001  | 0.00013 | 15.44735 | 0.20857  | 148.75 | 1.93   |
| 1500                                                       | 0.5697     | 15.71504  | 0.06494  | 0.00003   | 0.00015 | 0.00017   | 0.00014 | 0.32619  | 0.26927  | 0.00006  | 0.00027 | 0.00011  | 0.00005 | 15.63418 | 0.0773   | 150.48 | 0.71   |
| 2000                                                       | 0.8441     | 15.66148  | 0.03769  | 0.00072   | 0.00036 | 0.00051   | 0.00015 | 0.96287  | 0.28166  | 0.00132  | 0.00067 | 0.00014  | 0.00008 | 15.48127 | 0.05775  | 149.07 | 0.53   |
| 2500                                                       | 0.8883     | 15.94177  | 0.07997  | 0.00388   | 0.00277 | 0.00159   | 0.00126 | 2.95884  | 2.33934  | 0.00712  | 0.00509 | 0.00026  | 0.0002  | 15.4413  | 0.38028  | 148.7  | 3.52   |
| 3000                                                       | 0.9103     | 16.03604  | 0.15617  | -0.00046  | 0.00397 | 0.00239   | 0.00162 | 4.41515  | 2.98368  | -0.00084 | 0.00728 | 0.00023  | 0.00044 | 15.29963 | 0.50042  | 147.39 | 4.63   |
| 5000                                                       | 0.9748     | 15.92285  | 0.03571  | 0.0072    | 0.00161 | 0.00075   | 0.00059 | 1.3935   | 1.09584  | 0.01322  | 0.00296 | 0.00045  | 0.00012 | 15.67176 | 0.17772  | 150.82 | 1.64   |
| 9000                                                       | 1          | 16.20457  | 0.11403  | 0.00319   | 0.00474 | 0.00116   | 0.00169 | 2.12501  | 3.0787   | 0.00585  | 0.0087  | 0.00037  | 0.0003  | 15.83119 | 0.51038  | 152.3  | 4.71   |
|                                                            |            |           |          |           |         |           |         |          |          |          |         |          |         |          |          |        |        |
| Integrated                                                 |            | 15.80925  | 0.0341   | 0.00103   | 0.00028 | 0.00075   | 0.00014 | 1.4005   | 0.26522  | 0.00189  | 0.00052 | 0.00014  | 0.00004 | 15.55857 | 0.0537   | 149.78 | 0.66   |

Appendix 2 continued

| 03Sov MU#1                                                 |            |           |         |           |         |           |         |           |          |          |         |          |         |          |          |        |        |
|------------------------------------------------------------|------------|-----------|---------|-----------|---------|-----------|---------|-----------|----------|----------|---------|----------|---------|----------|----------|--------|--------|
| Weighted average of J from standards = 5.570e-03 1.672e-05 |            |           |         |           |         |           |         |           |          |          |         |          |         |          |          |        |        |
| Laser Power                                                | Cumulative | 40Ar/39Ar | +/-     | 37Ar/39Ar | +/-     | 36Ar/39Ar | +/-     | % Atm.    | +/-      | Ca/K     | +/-     | Cl/K     | +/-     | 40*/39K  | +/-      | Age    | +/-    |
| (mW)                                                       | 39Ar       | meas.     |         | meas.     |         | meas.     |         | 40Ar      |          |          |         |          |         |          |          | (Ma)   | (Ma)   |
| 500                                                        | 0.0012     | 46.30248  | 5.28053 | -0.04554  | 0.13551 | 0.18643   | 0.08955 | 119.06388 | 55.57825 | -0.08356 | 0.24862 | -0.02451 | 0.01224 | -8.8211  | 25.73423 | -90.8  | 271.68 |
| 1000                                                       | 0.0094     | 24.04745  | 0.47844 | -0.00825  | 0.0276  | 0.01983   | 0.00937 | 24.40474  | 11.51763 | -0.01513 | 0.05064 | -0.00182 | 0.00186 | 18.15618 | 2.79031  | 173.62 | 25.44  |
| 1500                                                       | 0.6659     | 16.85493  | 0.04751 | -0.00116  | 0.00035 | 0.00137   | 0.00021 | 2.39916   | 0.36498  | -0.00212 | 0.00064 | 0.00011  | 0.00005 | 16.42155 | 0.077    | 157.73 | 0.71   |
| 2000                                                       | 0.8539     | 16.3564   | 0.07151 | -0.00191  | 0.00086 | 0.00061   | 0.0005  | 1.1122    | 0.89898  | -0.0035  | 0.00158 | 0.00023  | 0.0001  | 16.14509 | 0.16295  | 155.19 | 1.5    |
| 2500                                                       | 0.8744     | 16.51472  | 0.11168 | -0.01139  | 0.00689 | -0.00216  | 0.00574 | -3.86823  | 10.28903 | -0.0209  | 0.01265 | -0.00058 | 0.00094 | 17.12256 | 1.70004  | 164.17 | 15.58  |
| 3000                                                       | 0.9169     | 16.57306  | 0.12557 | -0.00716  | 0.00285 | -0.00283  | 0.00166 | -5.04306  | 2.96579  | -0.01314 | 0.00524 | -0.00008 | 0.0004  | 17.37756 | 0.50797  | 166.51 | 4.65   |
| 5000                                                       | 0.972      | 16.10216  | 0.11217 | -0.00489  | 0.00254 | -0.00164  | 0.00147 | -3.01126  | 2.69768  | -0.00897 | 0.00465 | 0.00003  | 0.00032 | 16.55639 | 0.44867  | 158.97 | 4.12   |
| 9000                                                       | 1          | 16.4174   | 0.17064 | -0.00909  | 0.00462 | -0.00085  | 0.0027  | -1.53492  | 4.86098  | -0.01668 | 0.00848 | 0.00073  | 0.0006  | 16.63914 | 0.81519  | 159.73 | 7.49   |
|                                                            |            |           |         |           |         |           |         |           |          |          |         |          |         |          |          |        |        |
| Integrated                                                 |            | 16.7817   | 0.0356  | -0.0023   | 0.00048 | 0.00111   | 0.00027 | 1.96242   | 0.48117  | -0.00422 | 0.00087 | 0.00008  | 0.00006 | 16.42323 | 0.08786  | 157.75 | 0.93   |
| 13Sov MU#1                                                 |            |           |         |           |         |           |         |           |          |          |         |          |         |          |          |        |        |
| Weighted average of J from standards = 5.570e-03 1.672e-05 |            |           |         |           |         |           |         |           |          |          |         |          |         |          |          |        |        |
| Laser Power                                                | Cumulative | 40Ar/39Ar | +/-     | 37Ar/39Ar | +/-     | 36Ar/39Ar | +/-     | % Atm.    | +/-      | Ca/K     | +/-     | Cl/K     | +/-     | 40*/39K  | +/-      | Age    | +/-    |
| (mW)                                                       | 39Ar       | meas.     |         | meas.     |         | meas.     |         | 40Ar      |          |          |         |          |         |          |          | (Ma)   | (Ma)   |
| 500                                                        | 0.0107     | 20.17711  | 0.30652 | 0.01106   | 0.01497 | 0.03826   | 0.0128  | 56.10617  | 18.76342 | 0.0203   | 0.02747 | 0.00089  | 0.00158 | 8.84354  | 3.78312  | 86.66  | 36.19  |
| 1000                                                       | 0.1023     | 19.36072  | 0.0968  | 0.00392   | 0.00149 | 0.01505   | 0.00184 | 23.00866  | 2.80536  | 0.00719  | 0.00273 | 0.00054  | 0.00017 | 14.88325 | 0.54792  | 143.53 | 5.08   |
| 1500                                                       | 0.4094     | 16.12708  | 0.04921 | 0.00017   | 0.00039 | 0.001     | 0.00045 | 1.83962   | 0.82819  | 0.0003   | 0.00072 | 0.00024  | 0.00009 | 15.80125 | 0.14182  | 152.02 | 1.31   |
| 2000                                                       | 0.6556     | 16.1885   | 0.04167 | 0.00033   | 0.00072 | 0.00144   | 0.00055 | 2.64154   | 1.01332  | 0.0006   | 0.00132 | 0.00013  | 0.00009 | 15.73197 | 0.16873  | 151.38 | 1.56   |
| 2500                                                       | 0.8581     | 16.07761  | 0.06471 | -0.00049  | 0.00058 | 0.00139   | 0.00074 | 2.55604   | 1.35883  | -0.0009  | 0.00107 | 0.00032  | 0.0001  | 15.63771 | 0.22702  | 150.51 | 2.1    |
| 3000                                                       | 0.9178     | 16.17744  | 0.07401 | -0.00077  | 0.00244 | 0.00451   | 0.00238 | 8.2579    | 4.36218  | -0.00141 | 0.00448 | 0.00013  | 0.00044 | 14.81427 | 0.70774  | 142.89 | 6.56   |
| 5000                                                       | 0.9517     | 16.42786  | 0.08409 | 0.01109   | 0.00456 | 0.0049    | 0.00418 | 8.82721   | 7.53441  | 0.02034  | 0.00837 | 0.00008  | 0.0005  | 14.95077 | 1.23794  | 144.16 | 11.47  |
| 9000                                                       | 1          | 16.35496  | 0.08204 | 0.00225   | 0.00304 | 0.0044    | 0.00302 | 7.9672    | 5.46097  | 0.00413  | 0.00559 | 0.00052  | 0.0004  | 15.02462 | 0.89479  | 144.84 | 8.29   |
|                                                            |            |           |         |           |         |           |         |           |          |          |         |          |         |          |          |        |        |
| Integrated                                                 |            | 16.49584  | 0.02529 | 0.00095   | 0.00041 | 0.00338   | 0.00041 | 6.06793   | 0.73741  | 0.00174  | 0.00076 | 0.00026  | 0.00006 | 15.46699 | 0.12375  | 148.93 | 1.22   |

Appendix 2 continued

| 01Red SE#1                                                 |            |           |         |           |         |           |         |          |         |          |         |         |         |          |         |        |       |
|------------------------------------------------------------|------------|-----------|---------|-----------|---------|-----------|---------|----------|---------|----------|---------|---------|---------|----------|---------|--------|-------|
| Weighted average of J from standards = 5.570e-03 1.672e-05 |            |           |         |           |         |           |         |          |         |          |         |         |         |          |         |        |       |
| Laser Power                                                | Cumulative | 40Ar/39Ar | +/-     | 37Ar/39Ar | +/-     | 36Ar/39Ar | +/-     | % Atm.   | +/-     | Ca/K     | +/-     | Cl/K    | +/-     | 40*/39K  | +/-     | Age    | +/-   |
| (mW)                                                       | 39Ar       | meas.     |         | meas.     |         | meas.     |         | 40Ar     |         |          |         |         |         |          |         | (Ma)   | (Ma)  |
| 500                                                        | 0.0141     | 364.47562 | 4.36073 | 1.84936   | 0.05559 | 1.13299   | 0.01875 | 91.82289 | 1.05378 | 3.39776  | 0.10226 | 0.02683 | 0.00203 | 29.84012 | 3.86312 | 277.1  | 33.25 |
| 1000                                                       | 0.0876     | 26.60061  | 0.19811 | 7.49784   | 0.07375 | 0.0595    | 0.00159 | 63.83977 | 1.70933 | 13.83074 | 0.13677 | 0.00549 | 0.00073 | 9.65931  | 0.46316 | 94.44  | 4.41  |
| 1500                                                       | 0.2067     | 13.61165  | 0.07982 | 10.2662   | 0.08325 | 0.01758   | 0.00076 | 32.02281 | 1.63145 | 18.97463 | 0.15499 | 0.00152 | 0.00024 | 9.3002   | 0.23024 | 91.02  | 2.2   |
| 2000                                                       | 0.3567     | 13.15467  | 0.06167 | 4.98761   | 0.03545 | 0.01132   | 0.00076 | 22.36457 | 1.69989 | 9.18393  | 0.06551 | 0.00065 | 0.00015 | 10.22573 | 0.2294  | 99.83  | 2.18  |
| 2500                                                       | 0.4916     | 12.73042  | 0.04159 | 2.95252   | 0.02197 | 0.00792   | 0.00058 | 16.50124 | 1.34808 | 5.42878  | 0.04049 | 0.00044 | 0.00016 | 10.62716 | 0.17568 | 103.64 | 1.66  |
| 3000                                                       | 0.606      | 11.99554  | 0.0492  | 3.22238   | 0.02368 | 0.00735   | 0.00075 | 15.93446 | 1.85487 | 5.92611  | 0.04364 | 0.00049 | 0.00022 | 10.08215 | 0.22655 | 98.47  | 2.15  |
| 5000                                                       | 0.889      | 14.47488  | 0.04101 | 0.478     | 0.00338 | 0.01547   | 0.00046 | 31.37006 | 0.93453 | 0.87736  | 0.0062  | 0.00125 | 0.00009 | 9.91707  | 0.13839 | 96.9   | 1.32  |
| 9000                                                       | 1          | 40.33932  | 0.17352 | 0.79427   | 0.01015 | 0.09481   | 0.0024  | 69.34248 | 1.74068 | 1.45819  | 0.01865 | 0.01105 | 0.00049 | 12.36487 | 0.70475 | 120.03 | 6.62  |
| Integrated                                                 |            | 22.34723  | 0.03507 | 3.54566   | 0.01116 | 0.04094   | 0.00041 | 52.89723 | 0.54052 | 6.52213  | 0.02058 | 0.00276 | 0.0001  | 10.5386  | 0.12228 | 102.8  | 1.2   |

| 01Sov FS#1                                                 |            |             |             |           |         |           |           |           |          |         |         |          |         |            |            |         |         |
|------------------------------------------------------------|------------|-------------|-------------|-----------|---------|-----------|-----------|-----------|----------|---------|---------|----------|---------|------------|------------|---------|---------|
| Weighted average of J from standards = 5.570e-03 1.672e-05 |            |             |             |           |         |           |           |           |          |         |         |          |         |            |            |         |         |
| Laser Power                                                | Cumulative | 40Ar/39Ar   | +/-         | 37Ar/39Ar | +/-     | 36Ar/39Ar | +/-       | % Atm.    | +/-      | Ca/K    | +/-     | Cl/K     | +/-     | 40*/39K    | +/-        | Age     | +/-     |
| (mW)                                                       | 39Ar       | meas.       |             | meas.     |         | meas.     |           | 40Ar      |          |         |         |          |         |            |            | (Ma)    | (Ma)    |
| 300                                                        | 0.0001     | 80619.10202 | 114594.2674 | -5.45848  | 8.15269 | 261.87984 | 372.25786 | 95.98962  | 1.21513  | -9.9771 | 14.8444 | 0.12189  | 0.44758 | 3220.71333 | 4663.80764 | 5300.43 | 2471.73 |
| 600                                                        | 0.0029     | 13452.44676 | 1194.71336  | 0.3593    | 0.16665 | 40.52267  | 3.63265   | 89.01314  | 1.09115  | 0.65943 | 0.30594 | 0.09533  | 0.03095 | 1478.37377 | 197.04717  | 4006.01 | 214.18  |
| 1000                                                       | 0.0185     | 1051.86673  | 34.36346    | 0.30456   | 0.02324 | 2.50492   | 0.08778   | 70.36996  | 0.89452  | 0.55894 | 0.04267 | 0.0046   | 0.00221 | 311.72673  | 13.87648   | 1814.06 | 50.9    |
| 1500                                                       | 0.0949     | 32.3809     | 0.22596     | 0.20605   | 0.00523 | 0.07034   | 0.00283   | 64.19247  | 2.54851  | 0.37813 | 0.00959 | 0.00036  | 0.00037 | 11.58585   | 0.82884    | 112.7   | 7.82    |
| 2000                                                       | 0.2177     | 13.47011    | 0.08739     | 0.18837   | 0.00297 | 0.01436   | 0.00166   | 31.44961  | 3.65403  | 0.34568 | 0.00545 | 0.00023  | 0.00019 | 9.21468    | 0.49511    | 90.2    | 4.73    |
| 2500                                                       | 0.3273     | 7.41366     | 0.0514      | 0.16965   | 0.00629 | 0.00345   | 0.00132   | 13.59996  | 5.28346  | 0.31132 | 0.01154 | -0.00009 | 0.00028 | 6.38051    | 0.3929     | 62.94   | 3.81    |
| 3000                                                       | 0.4308     | 13.57862    | 0.12865     | 0.18175   | 0.00419 | 0.02499   | 0.00286   | 54.3841   | 6.22476  | 0.33354 | 0.0077  | 0.00014  | 0.00023 | 6.18126    | 0.84576    | 61      | 8.21    |
| 4000                                                       | 0.6333     | 11.25676    | 0.06578     | 0.10189   | 0.00256 | 0.01326   | 0.00079   | 34.83841  | 2.05869  | 0.18696 | 0.00469 | 0.00031  | 0.00015 | 7.31626    | 0.23551    | 71.99   | 2.27    |
| 5000                                                       | 0.7572     | 7.27922     | 0.03939     | 0.10677   | 0.00319 | 0.00421   | 0.00132   | 17.04335  | 5.39823  | 0.19592 | 0.00585 | 0.00013  | 0.00018 | 6.01441    | 0.3929     | 59.38   | 3.82    |
| 9000                                                       | 0.9997     | 17.9201     | 0.07152     | 0.12837   | 0.00225 | 0.0307    | 0.00088   | 50.65293  | 1.43883  | 0.23557 | 0.00412 | 0.00014  | 0.00017 | 8.82919    | 0.2602     | 86.52   | 2.49    |
| 9000                                                       | 1          | -314.03046  | 178.9693    | 1.35819   | 1.46851 | -1.48828  | 0.96214   | 140.06814 | 43.03028 | 2.49448 | 2.69968 | 0.08254  | 0.12682 | 125.95887  | 152.94542  | 957.97  | 902.25  |
| Integrated                                                 |            | 76.6757     | 0.17558     | 0.14672   | 0.00148 | 0.2017    | 0.00166   | 77.74616  | 0.61657  | 0.26924 | 0.00271 | 0.00054  | 0.00013 | 17.05845   | 0.4747     | 163.58  | 4.38    |

Appendix 2 continued

| 03Sov FS#1                                                 |            |           |         |           |         |           |         |           |           |         |         |          |         |          |         |        |       |
|------------------------------------------------------------|------------|-----------|---------|-----------|---------|-----------|---------|-----------|-----------|---------|---------|----------|---------|----------|---------|--------|-------|
| Weighted average of J from standards = 5.570e-03 1.672e-05 |            |           |         |           |         |           |         |           |           |         |         |          |         |          |         |        |       |
| Laser Power                                                | Cumulative | 40Ar/39Ar | +/-     | 37Ar/39Ar | +/-     | 36Ar/39Ar | +/-     | % Atm.    | +/-       | Ca/K    | +/-     | Cl/K     | +/-     | 40*/39K  | +/-     | Age    | +/-   |
| (mW)                                                       | 39Ar       | meas.     |         | meas.     |         | meas.     |         | 40Ar      |           |         |         |          |         |          |         | (Ma)   | (Ma)  |
| 300                                                        | 0.0211     | 362.40419 | 8.29317 | 0.20822   | 0.02473 | 0.99592   | 0.03447 | 81.20783  | 2.10949   | 0.38212 | 0.0454  | 0.03282  | 0.00233 | 68.10806 | 7.8038  | 579.62 | 56.79 |
| 600                                                        | 0.1968     | 19.51895  | 0.09403 | 0.16754   | 0.00327 | 0.02423   | 0.00115 | 36.66872  | 1.73031   | 0.30744 | 0.006   | 0.00155  | 0.00022 | 12.34425 | 0.34303 | 119.84 | 3.22  |
| 1000                                                       | 0.424      | 17.68455  | 0.04938 | 0.23595   | 0.00303 | 0.01508   | 0.00087 | 25.13655  | 1.45711   | 0.433   | 0.00555 | 0.00039  | 0.00018 | 13.21924 | 0.26055 | 128.04 | 2.44  |
| 1500                                                       | 0.6173     | 15.50807  | 0.05209 | 0.21315   | 0.00345 | 0.0074    | 0.001   | 14.01615  | 1.90943   | 0.39116 | 0.00634 | 0.00058  | 0.00017 | 13.31091 | 0.29914 | 128.9  | 2.8   |
| 2000                                                       | 0.7118     | 13.95551  | 0.09726 | 0.21141   | 0.00494 | 0.00498   | 0.00223 | 10.43956  | 4.73433   | 0.38796 | 0.00907 | -0.00012 | 0.00028 | 12.47389 | 0.66527 | 121.06 | 6.24  |
| 2500                                                       | 0.768      | 13.81184  | 0.08128 | 0.16797   | 0.00766 | 0.00213   | 0.00312 | 4.47571   | 6.68587   | 0.30823 | 0.01405 | 0.00037  | 0.00046 | 13.16686 | 0.92488 | 127.55 | 8.65  |
| 3000                                                       | 0.8112     | 13.81533  | 0.11839 | 0.12893   | 0.00997 | 0.00448   | 0.00436 | 9.52833   | 9.35287   | 0.23659 | 0.01831 | 0.00043  | 0.00051 | 12.47323 | 1.29407 | 121.05 | 12.15 |
| 4000                                                       | 0.8591     | 13.91926  | 0.17932 | 0.12246   | 0.00946 | 0.00514   | 0.00444 | 10.8687   | 9.43464   | 0.22472 | 0.01736 | 0.00024  | 0.00059 | 12.38102 | 1.32033 | 120.19 | 12.4  |
| 5000                                                       | 0.9076     | 12.92438  | 0.06913 | 0.08404   | 0.0095  | 0.00705   | 0.00394 | 16.11235  | 9.03904   | 0.15422 | 0.01744 | 0.00026  | 0.00052 | 10.81769 | 1.16724 | 105.44 | 11.05 |
| 9000                                                       | 0.9955     | 17.18529  | 0.09846 | 0.19695   | 0.00786 | 0.02028   | 0.00222 | 34.84339  | 3.82606   | 0.36142 | 0.01442 | 0.00022  | 0.00031 | 11.17956 | 0.65991 | 108.87 | 6.24  |
| 9000                                                       | 1          | 4.90318   | 0.29847 | 0.20631   | 0.07828 | -0.01088  | 0.02149 | -66.29057 | 130.31075 | 0.37861 | 0.14368 | -0.00322 | 0.00325 | 8.10533  | 6.35862 | 79.58  | 61.07 |
|                                                            |            |           |         |           |         |           |         |           |           |         |         |          |         |          |         |        |       |
| 01SOV-1 WR#L1                                              |            |           |         |           |         |           |         |           |           |         |         |          |         |          |         |        |       |
| Weighted average of J from standards = 4.286e-03 9.931e-06 |            |           |         |           |         |           |         |           |           |         |         |          |         |          |         |        |       |
| Laser Power                                                | Cumulative | 40Ar/39Ar | +/-     | 37Ar/39Ar | +/-     | 36Ar/39Ar | +/-     | % Atm.    | +/-       | Ca/K    | +/-     | Cl/K     | +/-     | 40*/39K  | +/-     | Age    | +/-   |
| (mW)                                                       | 39Ar       | meas.     |         | meas.     |         | meas.     |         | 40Ar      |           |         |         |          |         |          |         | (Ma)   | (Ma)  |
| 500                                                        | 0.1654     | 8.4074    | 0.02626 | 0.05525   | 0.00044 | 0.00878   | 0.00012 | 30.89899  | 0.4188    | 0.10138 | 0.00081 | 0.0006   | 0.00006 | 5.7893   | 0.04049 | 44.17  | 0.31  |
| 1000                                                       | 0.523      | 5.80265   | 0.01372 | 0.0841    | 0.00056 | 0.00078   | 0.00005 | 3.86991   | 0.24164   | 0.15432 | 0.00103 | 0.0002   | 0.00001 | 5.54987  | 0.01939 | 42.36  | 0.15  |
| 1500                                                       | 0.7257     | 5.77803   | 0.01402 | 0.58178   | 0.00307 | 0.00106   | 0.00008 | 4.61459   | 0.41794   | 1.06792 | 0.00564 | 0.00028  | 0.00003 | 5.48533  | 0.02763 | 41.88  | 0.21  |
| 2000                                                       | 0.8009     | 6.10746   | 0.01828 | 0.5842    | 0.00359 | 0.00216   | 0.00018 | 9.72897   | 0.88335   | 1.07237 | 0.00659 | 0.0006   | 0.00008 | 5.48873  | 0.05653 | 41.9   | 0.43  |
| 2500                                                       | 0.8859     | 6.50811   | 0.02576 | 0.50026   | 0.00316 | 0.00304   | 0.00024 | 13.22874  | 1.10584   | 0.91823 | 0.0058  | 0.00061  | 0.00005 | 5.62339  | 0.07542 | 42.92  | 0.57  |
| 3000                                                       | 0.9312     | 6.75632   | 0.02548 | 0.40785   | 0.00279 | 0.00427   | 0.0003  | 18.24019  | 1.30214   | 0.74856 | 0.00513 | 0.00116  | 0.0001  | 5.50126  | 0.09035 | 42     | 0.68  |
| 4000                                                       | 0.965      | 7.212     | 0.02662 | 1.0744    | 0.00769 | 0.00509   | 0.00062 | 19.72324  | 2.53626   | 1.97288 | 0.01413 | 0.00104  | 0.00011 | 5.77011  | 0.18381 | 44.02  | 1.39  |
| 9000                                                       | 1          | 8.20876   | 0.04197 | 0.85478   | 0.00736 | 0.00946   | 0.00043 | 33.30028  | 1.54045   | 1.56934 | 0.01352 | 0.00281  | 0.00011 | 5.45872  | 0.12975 | 41.67  | 0.98  |
|                                                            |            |           |         |           |         |           |         |           |           |         |         |          |         |          |         |        |       |
| Integrated                                                 |            | 6.48646   | 0.00773 | 0.32839   | 0.00084 | 0.00306   | 0.00005 | 13.59757  | 0.22373   | 0.60269 | 0.00154 | 0.00051  | 0.00002 | 5.5801   | 0.0161  | 42.59  | 0.16  |

Appendix 2 continued

| 01SOV-2 WR#L1                                              |            |           |         |           |         |           |         |          |         |          |         |         |         |         |         |       |       |
|------------------------------------------------------------|------------|-----------|---------|-----------|---------|-----------|---------|----------|---------|----------|---------|---------|---------|---------|---------|-------|-------|
| Weighted average of J from standards = 4.286e-03 9.931e-06 |            |           |         |           |         |           |         |          |         |          |         |         |         |         |         |       |       |
| Laser Power                                                | Cumulative | 40Ar/39Ar | +/-     | 37Ar/39Ar | +/-     | 36Ar/39Ar | +/-     | % Atm.   | +/-     | Ca/K     | +/-     | Cl/K    | +/-     | 40*/39K | +/-     | Age   | +/-   |
| (mW)                                                       | 39Ar       | meas.     |         | meas.     |         | meas.     |         | 40Ar     |         |          |         |         |         |         |         | (Ma)  | (Ma)  |
| 500                                                        | 0.008      | 7.88682   | 0.03852 | 0.0217    | 0.00232 | 0.01661   | 0.00106 | 62.44559 | 3.99676 | 0.03982  | 0.00426 | 0.00055 | 0.00023 | 2.95074 | 0.31462 | 22.65 | 2.4   |
| 1000                                                       | 0.0504     | 7.84707   | 0.0255  | 0.01748   | 0.00042 | 0.0067    | 0.00031 | 25.31349 | 1.17425 | 0.03208  | 0.00076 | 0.00085 | 0.00005 | 5.8386  | 0.09454 | 44.54 | 0.71  |
| 1500                                                       | 0.1697     | 6.80758   | 0.01634 | 0.0152    | 0.00022 | 0.00195   | 0.00008 | 8.47832  | 0.36714 | 0.02788  | 0.00041 | 0.00033 | 0.00002 | 6.20329 | 0.02949 | 47.29 | 0.22  |
| 2000                                                       | 0.3324     | 6.56178   | 0.01423 | 0.02124   | 0.00026 | 0.00156   | 0.00008 | 7.03695  | 0.34675 | 0.03898  | 0.00048 | 0.00035 | 0.00002 | 6.07252 | 0.02647 | 46.3  | 0.2   |
| 2500                                                       | 0.4178     | 6.55349   | 0.02234 | 0.06261   | 0.00042 | 0.00126   | 0.00011 | 5.62295  | 0.49823 | 0.11488  | 0.00077 | 0.00021 | 0.00004 | 6.15724 | 0.0391  | 46.94 | 0.29  |
| 3000                                                       | 0.5333     | 6.44433   | 0.01962 | 0.1171    | 0.00059 | 0.00111   | 0.00007 | 4.94106  | 0.32822 | 0.21488  | 0.00108 | 0.00021 | 0.00002 | 6.09818 | 0.02848 | 46.49 | 0.21  |
| 4000                                                       | 0.8195     | 6.39666   | 0.01373 | 0.42279   | 0.00177 | 0.00151   | 0.00003 | 6.44124  | 0.14565 | 0.776    | 0.00325 | 0.00026 | 0.00002 | 5.95863 | 0.01609 | 45.44 | 0.12  |
| 9000                                                       | 1          | 6.42938   | 0.01291 | 0.44573   | 0.00217 | 0.00214   | 0.00009 | 9.32244  | 0.39287 | 0.81811  | 0.00398 | 0.00039 | 0.00002 | 5.80491 | 0.02795 | 44.29 | 0.21  |
| Integrated                                                 |            | 6.57075   | 0.00637 | 0.22655   | 0.00062 | 0.00196   | 0.00003 | 8.55187  | 0.141   | 0.41575  | 0.00114 | 0.00033 | 0.00001 | 5.98263 | 0.01104 | 45.62 | 0.13  |
| 01SOV-3 WR#L1                                              |            |           |         |           |         |           |         |          |         |          |         |         |         |         |         |       |       |
| Weighted average of J from standards = 4.286e-03 9.931e-06 |            |           |         |           |         |           |         |          |         |          |         |         |         |         |         |       |       |
| Laser Power                                                | Cumulative | 40Ar/39Ar | +/-     | 37Ar/39Ar | +/-     | 36Ar/39Ar | +/-     | % Atm.   | +/-     | Ca/K     | +/-     | Cl/K    | +/-     | 40*/39K | +/-     | Age   | +/-   |
| (mW)                                                       | 39Ar       | meas.     |         | meas.     |         | meas.     |         | 40Ar     |         |          |         |         |         |         |         | (Ma)  | (Ma)  |
| 500                                                        | 0.0482     | 272.34709 | 1.22349 | 10.29764  | 0.05153 | 0.91234   | 0.00817 | 98.68895 | 0.78959 | 19.03317 | 0.09595 | 0.00558 | 0.00057 | 3.59637 | 2.16681 | 27.56 | 16.48 |
| 1000                                                       | 0.1562     | 71.19239  | 0.20409 | 16.96751  | 0.09991 | 0.22514   | 0.00173 | 91.52072 | 0.69288 | 31.51063 | 0.18779 | 0.00191 | 0.00019 | 6.1073  | 0.50106 | 46.56 | 3.77  |
| 1500                                                       | 0.3439     | 25.65381  | 0.05813 | 14.1344   | 0.05721 | 0.07051   | 0.00093 | 76.76766 | 1.08353 | 26.19617 | 0.10711 | 0.0035  | 0.0002  | 6.01317 | 0.28259 | 45.85 | 2.13  |
| 2000                                                       | 0.6189     | 12.81558  | 0.03188 | 8.78168   | 0.04399 | 0.02687   | 0.0005  | 56.43744 | 1.15174 | 16.21374 | 0.08173 | 0.00724 | 0.0001  | 5.60469 | 0.14984 | 42.78 | 1.13  |
| 2500                                                       | 0.7921     | 11.68519  | 0.04823 | 9.25493   | 0.04437 | 0.02415   | 0.00073 | 54.67676 | 1.83583 | 17.09324 | 0.08248 | 0.00715 | 0.00021 | 5.31749 | 0.21748 | 40.61 | 1.64  |
| 3000                                                       | 0.8375     | 14.11602  | 0.07405 | 9.72271   | 0.06796 | 0.03437   | 0.00228 | 66.40558 | 4.76819 | 17.96318 | 0.12644 | 0.00491 | 0.00036 | 4.765   | 0.67713 | 36.43 | 5.13  |
| 4000                                                       | 0.8812     | 13.90216  | 0.07264 | 11.95664  | 0.07725 | 0.03074   | 0.00239 | 58.37655 | 5.08538 | 22.12561 | 0.14416 | 0.00563 | 0.00031 | 5.82347 | 0.71251 | 44.43 | 5.37  |
| 9000                                                       | 1          | 14.04256  | 0.07715 | 15.83258  | 0.10106 | 0.03202   | 0.00078 | 58.20953 | 1.61834 | 29.3791  | 0.18966 | 0.00942 | 0.00025 | 5.9224  | 0.23329 | 45.17 | 1.76  |
| Integrated                                                 |            | 34.10967  | 0.04361 | 11.85158  | 0.0244  | 0.09985   | 0.00051 | 83.71067 | 0.43372 | 21.92956 | 0.04553 | 0.00595 | 0.00008 | 5.5983  | 0.14982 | 42.73 | 1.13  |

Appendix 2 continued

| 01SOV-4 WR#L1                                              |            |           |         |           |         |           |         |          |         |         |         |         |         |         |         |       |      |
|------------------------------------------------------------|------------|-----------|---------|-----------|---------|-----------|---------|----------|---------|---------|---------|---------|---------|---------|---------|-------|------|
| Weighted average of J from standards = 4.286e-03 9.931e-06 |            |           |         |           |         |           |         |          |         |         |         |         |         |         |         |       |      |
| Laser Power                                                | Cumulative | 40Ar/39Ar | +/-     | 37Ar/39Ar | +/-     | 36Ar/39Ar | +/-     | % Atm.   | +/-     | Ca/K    | +/-     | Cl/K    | +/-     | 40*/39K | +/-     | Age   | +/-  |
| (mW)                                                       | 39Ar       | meas.     |         | meas.     |         | meas.     |         | 40Ar     |         |         |         |         |         |         |         | (Ma)  | (Ma) |
| 500                                                        | 0.1803     | 10.39321  | 0.01959 | 0.23352   | 0.0007  | 0.0135    | 0.00018 | 38.30723 | 0.51551 | 0.42855 | 0.00128 | 0.00061 | 0.00003 | 6.3946  | 0.05569 | 48.72 | 0.42 |
| 1000                                                       | 0.5201     | 6.77734   | 0.01336 | 0.39881   | 0.00188 | 0.00291   | 0.00004 | 12.23807 | 0.17246 | 0.73198 | 0.00346 | 0.00031 | 0.00002 | 5.92353 | 0.0171  | 45.18 | 0.13 |
| 1500                                                       | 0.7076     | 6.61143   | 0.01805 | 0.2879    | 0.00157 | 0.00257   | 0.00008 | 11.19967 | 0.36935 | 0.52836 | 0.00288 | 0.00028 | 0.00003 | 5.84579 | 0.02961 | 44.59 | 0.22 |
| 2000                                                       | 0.7813     | 6.57627   | 0.01638 | 0.22884   | 0.0015  | 0.00266   | 0.00017 | 11.70044 | 0.78825 | 0.41997 | 0.00275 | 0.00038 | 0.00003 | 5.78153 | 0.05384 | 44.11 | 0.41 |
| 2500                                                       | 0.8798     | 6.87818   | 0.01836 | 0.11819   | 0.0006  | 0.00349   | 0.00014 | 14.91533 | 0.62149 | 0.21688 | 0.0011  | 0.00049 | 0.00003 | 5.82749 | 0.04576 | 44.46 | 0.34 |
| 3000                                                       | 0.9321     | 7.20491   | 0.02453 | 0.0776    | 0.00058 | 0.00439   | 0.0002  | 18.00938 | 0.82367 | 0.14239 | 0.00106 | 0.00055 | 0.00004 | 5.88333 | 0.06334 | 44.88 | 0.48 |
| 4000                                                       | 0.9822     | 7.35785   | 0.0186  | 0.10029   | 0.00099 | 0.00492   | 0.00022 | 19.71391 | 0.87678 | 0.18403 | 0.00181 | 0.00064 | 0.00006 | 5.8839  | 0.06664 | 44.88 | 0.5  |
| 9000                                                       | 1          | 7.51736   | 0.0299  | 0.07874   | 0.00162 | 0.00555   | 0.00079 | 21.79719 | 3.12808 | 0.14448 | 0.00298 | 0.00069 | 0.00014 | 5.85589 | 0.23555 | 44.67 | 1.77 |
| Integrated                                                 |            | 7.45788   | 0.00734 | 0.27061   | 0.00072 | 0.00502   | 0.00005 | 19.66368 | 0.18954 | 0.49662 | 0.00132 | 0.00042 | 0.00001 | 5.96867 | 0.01554 | 45.52 | 0.16 |

| 01SOV-5 WR#L1                                              |            |           |         |           |         |           |         |          |         |         |         |         |         |         |         |       |      |
|------------------------------------------------------------|------------|-----------|---------|-----------|---------|-----------|---------|----------|---------|---------|---------|---------|---------|---------|---------|-------|------|
| Weighted average of J from standards = 4.286e-03 9.931e-06 |            |           |         |           |         |           |         |          |         |         |         |         |         |         |         |       |      |
| Laser Power                                                | Cumulative | 40Ar/39Ar | +/-     | 37Ar/39Ar | +/-     | 36Ar/39Ar | +/-     | % Atm.   | +/-     | Ca/K    | +/-     | Cl/K    | +/-     | 40*/39K | +/-     | Age   | +/-  |
| (mW)                                                       | 39Ar       | meas.     |         | meas.     |         | meas.     |         | 40Ar     |         |         |         |         |         |         |         | (Ma)  | (Ma) |
| 500                                                        | 0.0381     | 42.39858  | 0.19809 | 3.12938   | 0.01647 | 0.12813   | 0.00112 | 88.75174 | 0.69512 | 5.75471 | 0.03036 | 0.00884 | 0.00019 | 4.77633 | 0.29793 | 36.52 | 2.25 |
| 1000                                                       | 0.1338     | 11.66321  | 0.02994 | 3.63827   | 0.01613 | 0.02211   | 0.00046 | 53.58814 | 1.16711 | 6.69293 | 0.02974 | 0.00243 | 0.00005 | 5.41328 | 0.13736 | 41.33 | 1.04 |
| 1500                                                       | 0.3278     | 7.61577   | 0.02203 | 2.74105   | 0.01267 | 0.00634   | 0.00011 | 21.71638 | 0.44329 | 5.03921 | 0.02334 | 0.00101 | 0.00004 | 5.95021 | 0.03894 | 45.38 | 0.29 |
| 2000                                                       | 0.5186     | 6.75738   | 0.0165  | 1.92536   | 0.00819 | 0.00372   | 0.0001  | 13.97313 | 0.45436 | 3.53758 | 0.01507 | 0.00279 | 0.00003 | 5.79553 | 0.03428 | 44.21 | 0.26 |
| 2500                                                       | 0.7753     | 7.07068   | 0.01607 | 2.25621   | 0.00997 | 0.00483   | 0.0001  | 17.63873 | 0.43616 | 4.14645 | 0.01835 | 0.00354 | 0.00003 | 5.80834 | 0.03403 | 44.31 | 0.26 |
| 3000                                                       | 0.9161     | 7.65088   | 0.02452 | 2.59293   | 0.01195 | 0.00699   | 0.00017 | 24.29171 | 0.66583 | 4.7664  | 0.02201 | 0.0045  | 0.00007 | 5.78049 | 0.05485 | 44.1  | 0.41 |
| 4000                                                       | 0.9479     | 8.23077   | 0.03378 | 2.40531   | 0.01375 | 0.00855   | 0.0005  | 28.39845 | 1.78848 | 4.42093 | 0.02532 | 0.0039  | 0.00012 | 5.88212 | 0.1494  | 44.87 | 1.13 |
| 9000                                                       | 1          | 8.54855   | 0.02265 | 4.88588   | 0.02155 | 0.01104   | 0.0004  | 33.56703 | 1.39868 | 8.99595 | 0.03981 | 0.0039  | 0.00008 | 5.67899 | 0.12118 | 43.34 | 0.91 |
| Integrated                                                 |            | 9.09825   | 0.00966 | 2.64206   | 0.00472 | 0.01201   | 0.00008 | 36.73488 | 0.25671 | 4.85688 | 0.00869 | 0.00317 | 0.00002 | 5.74799 | 0.02449 | 43.86 | 0.21 |

Appendix 2 continued

| 02SOV WR#L1                                                |            |           |         |           |         |           |         |          |         |          |         |         |         |         |         |       |
|------------------------------------------------------------|------------|-----------|---------|-----------|---------|-----------|---------|----------|---------|----------|---------|---------|---------|---------|---------|-------|
| Weighted average of J from standards = 4.286e-03 9.931e-06 |            |           |         |           |         |           |         |          |         |          |         |         |         |         |         |       |
| Laser Power                                                | Cumulative | 40Ar/39Ar | +/-     | 37Ar/39Ar | +/-     | 36Ar/39Ar | +/-     | % Atm.   | +/-     | Ca/K     | +/-     | Cl/K    | +/-     | 40*/39K | +/-     | Age   |
| (mW)                                                       | 39Ar       | meas.     |         | meas.     |         | meas.     |         | 40Ar     |         |          |         |         |         |         |         | (Ma)  |
| 500                                                        | 0.0458     | 65.94839  | 0.22736 | 6.45127   | 0.02956 | 0.20577   | 0.00229 | 91.43687 | 1.00323 | 11.89136 | 0.05473 | 0.00423 | 0.0002  | 5.67055 | 0.66637 | 43.27 |
| 1000                                                       | 0.2153     | 16.82871  | 0.0513  | 7.0599    | 0.0346  | 0.03827   | 0.00049 | 63.85484 | 0.86069 | 13.01886 | 0.06412 | 0.00179 | 0.00009 | 6.10251 | 0.14799 | 46.53 |
| 1500                                                       | 0.4563     | 8.62299   | 0.02349 | 3.06689   | 0.01453 | 0.00972   | 0.00029 | 30.48625 | 0.99657 | 5.63954  | 0.02678 | 0.00631 | 0.00005 | 5.98653 | 0.08821 | 45.65 |
| 2000                                                       | 0.7145     | 8.88443   | 0.02005 | 3.5292    | 0.01625 | 0.01017   | 0.0003  | 30.65402 | 0.99146 | 6.49177  | 0.02997 | 0.00567 | 0.00008 | 6.15579 | 0.08928 | 46.93 |
| 2500                                                       | 0.8401     | 8.70028   | 0.03803 | 3.43382   | 0.0173  | 0.00972   | 0.00056 | 29.84513 | 1.89863 | 6.31591  | 0.0319  | 0.00544 | 0.00012 | 6.09767 | 0.16769 | 46.49 |
| 3000                                                       | 0.8955     | 9.02996   | 0.03854 | 3.27112   | 0.02322 | 0.01072   | 0.00098 | 32.19571 | 3.2253  | 6.01596  | 0.04281 | 0.00417 | 0.00019 | 6.11674 | 0.29257 | 46.63 |
| 4000                                                       | 0.9748     | 9.45323   | 0.04927 | 5.23996   | 0.02832 | 0.01358   | 0.00078 | 37.98473 | 2.45058 | 9.65032  | 0.05235 | 0.00506 | 0.00016 | 5.8658  | 0.23442 | 44.74 |
| 9000                                                       | 1          | 11.64166  | 0.05532 | 3.56838   | 0.02011 | 0.01985   | 0.0026  | 47.96856 | 6.60886 | 6.56402  | 0.03708 | 0.0028  | 0.00046 | 6.05717 | 0.77004 | 46.19 |
|                                                            |            |           |         |           |         |           |         |          |         |          |         |         |         |         |         |       |
| Integrated                                                 |            | 12.88963  | 0.01629 | 4.26216   | 0.00869 | 0.0243    | 0.00021 | 53.10585 | 0.48213 | 7.84408  | 0.01604 | 0.00487 | 0.00004 | 6.0488  | 0.06304 | 46.12 |
|                                                            |            |           |         |           |         |           |         |          |         |          |         |         |         |         |         |       |
| 14SOV WR#L1                                                |            |           |         |           |         |           |         |          |         |          |         |         |         |         |         |       |
| Weighted average of J from standards = 4.286e-03 9.931e-06 |            |           |         |           |         |           |         |          |         |          |         |         |         |         |         |       |
| Laser Power                                                | Cumulative | 40Ar/39Ar | +/-     | 37Ar/39Ar | +/-     | 36Ar/39Ar | +/-     | % Atm.   | +/-     | Ca/K     | +/-     | Cl/K    | +/-     | 40*/39K | +/-     | Age   |
| (mW)                                                       | 39Ar       | meas.     |         | meas.     |         | meas.     |         | 40Ar     |         |          |         |         |         |         |         | (Ma)  |
| 500                                                        | 0.0493     | 113.64291 | 1.10436 | 10.28376  | 0.10598 | 0.36549   | 0.00842 | 94.31612 | 2.00397 | 19.00732 | 0.19731 | 0.01195 | 0.00139 | 6.50489 | 2.29562 | 49.55 |
| 1000                                                       | 0.1803     | 33.88527  | 0.23166 | 16.35545  | 0.12265 | 0.09675   | 0.00378 | 80.46308 | 3.25947 | 30.36069 | 0.23034 | 0.00378 | 0.00053 | 6.69169 | 1.11858 | 50.96 |
| 1500                                                       | 0.3684     | 31.82871  | 0.15051 | 19.18104  | 0.11055 | 0.08851   | 0.00237 | 77.2792  | 2.18301 | 35.67786 | 0.20846 | 0.00368 | 0.00028 | 7.3243  | 0.70586 | 55.7  |
| 2000                                                       | 0.5125     | 20.80541  | 0.16969 | 21.12181  | 0.20814 | 0.05156   | 0.00244 | 64.95369 | 3.43469 | 39.34247 | 0.39355 | 0.00421 | 0.00046 | 7.39153 | 0.72801 | 56.2  |
| 2500                                                       | 0.7406     | 17.2347   | 0.09648 | 17.72084  | 0.12912 | 0.03988   | 0.00172 | 60.00226 | 2.93708 | 32.92737 | 0.24296 | 0.00635 | 0.0003  | 6.96898 | 0.51407 | 53.04 |
| 3000                                                       | 0.8301     | 15.36329  | 0.12599 | 23.07557  | 0.19576 | 0.03811   | 0.00338 | 61.041   | 6.50421 | 43.04192 | 0.3712  | 0.00776 | 0.0007  | 6.07297 | 1.01597 | 46.3  |
| 4000                                                       | 0.9771     | 15.21159  | 0.09877 | 35.57221  | 0.23363 | 0.04043   | 0.00317 | 59.36952 | 6.16474 | 66.95205 | 0.45106 | 0.00973 | 0.00053 | 6.32774 | 0.96197 | 48.22 |
| 9000                                                       | 1          | 13.52758  | 0.27137 | 21.33051  | 0.39781 | 0.02087   | 0.0117  | 32.66269 | 25.5933 | 39.73715 | 0.75243 | 0.00918 | 0.00235 | 9.22843 | 3.51397 | 69.9  |
|                                                            |            |           |         |           |         |           |         |          |         |          |         |         |         |         |         |       |
| Integrated                                                 |            | 26.83001  | 0.06712 | 21.15751  | 0.06296 | 0.07355   | 0.00112 | 74.58467 | 1.22358 | 39.40998 | 0.11905 | 0.00617 | 0.00019 | 6.91482 | 0.33379 | 52.63 |
