# Supplementary material
Source: publisher figshare collection journal article supplement (https://gsapubs.figshare.com/ndownloader/files/22411770)

DR7B

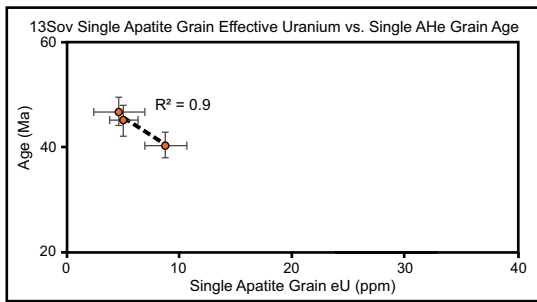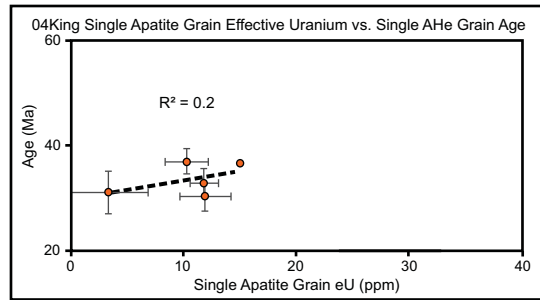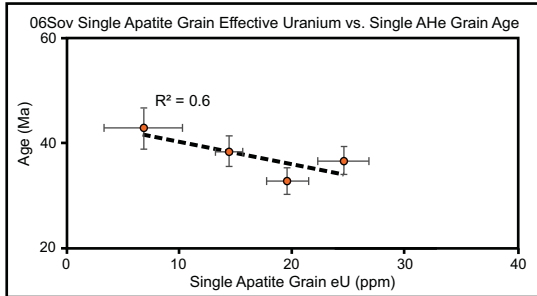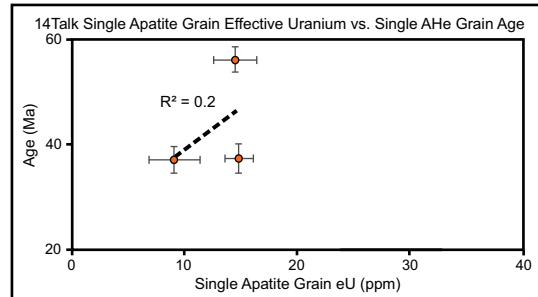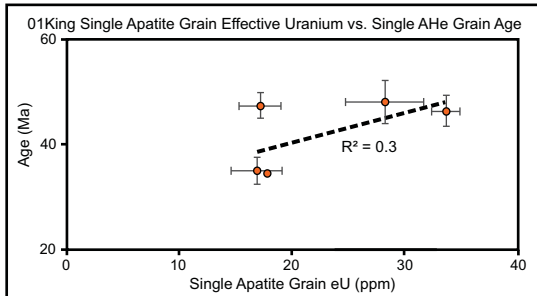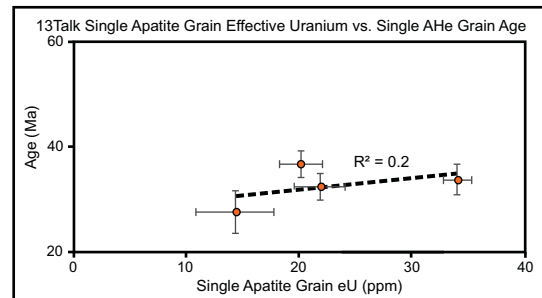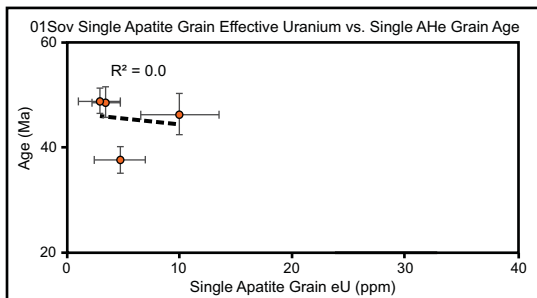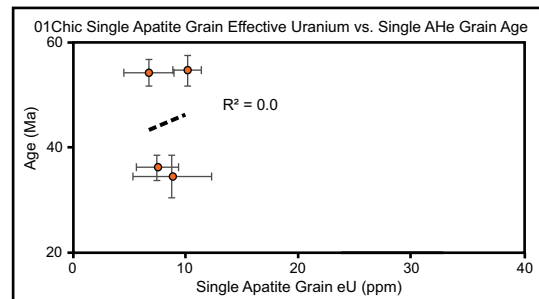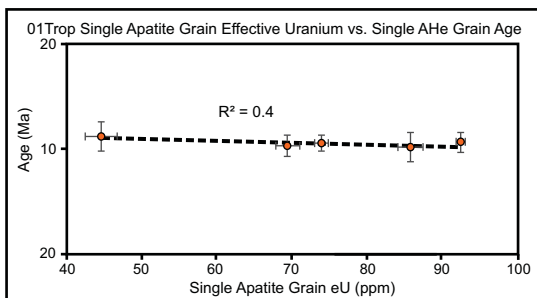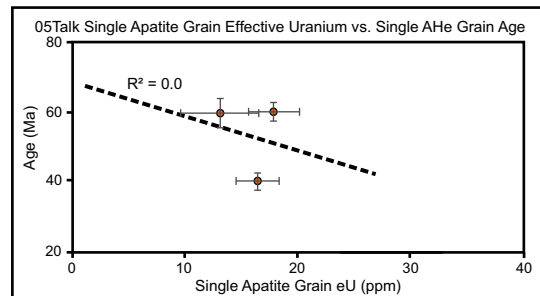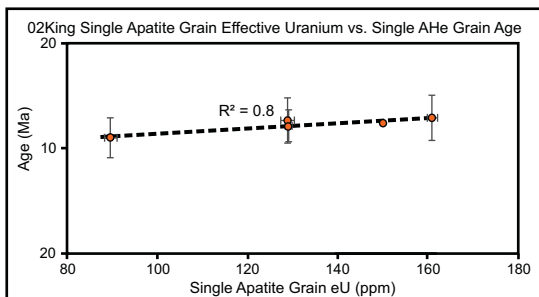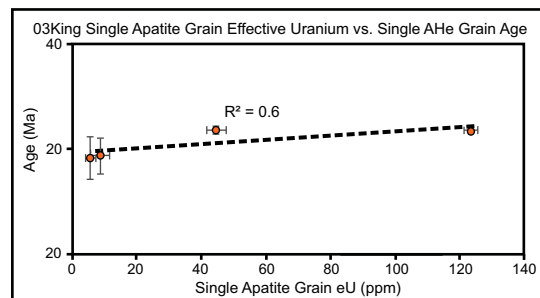

Supplement: Supplementary file 1 [file 22411770]

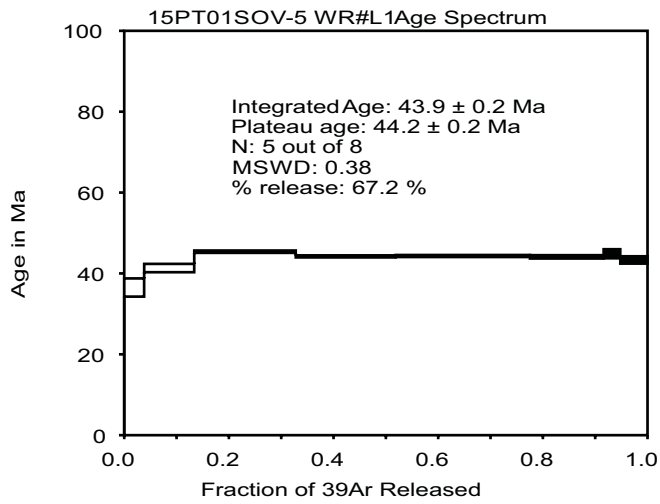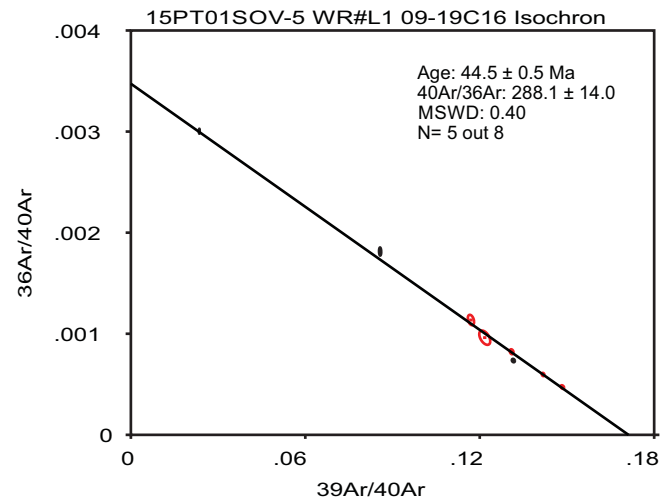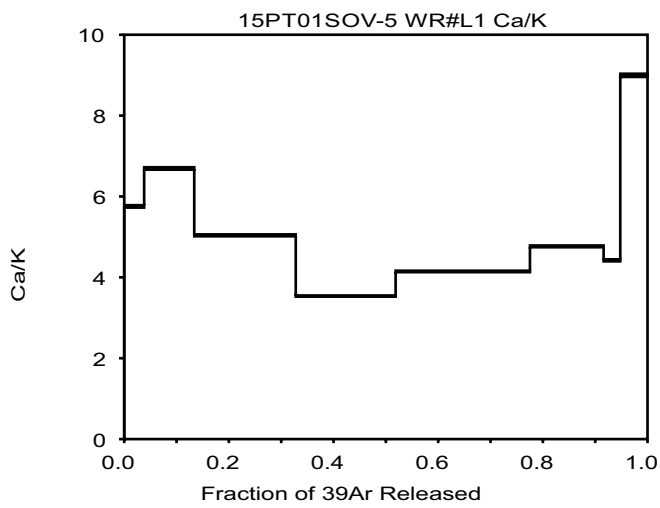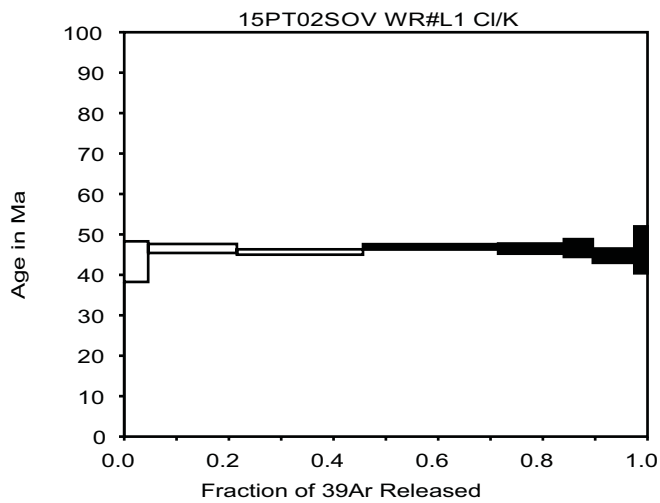

Patrick Terhune, Figure DR5.13

Supplement: Supplementary file 2 [file 22411770]

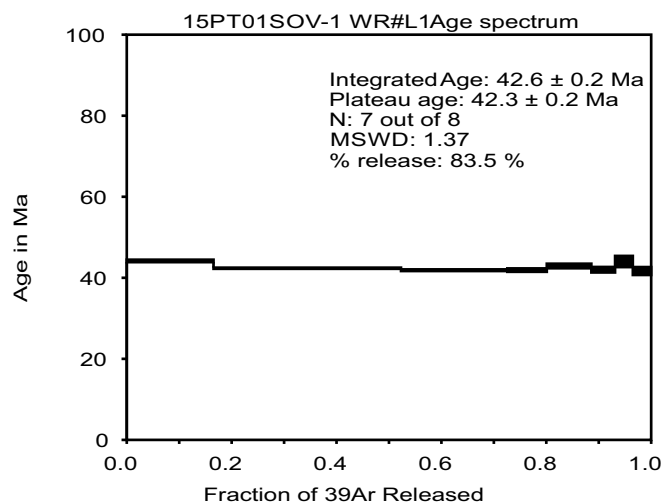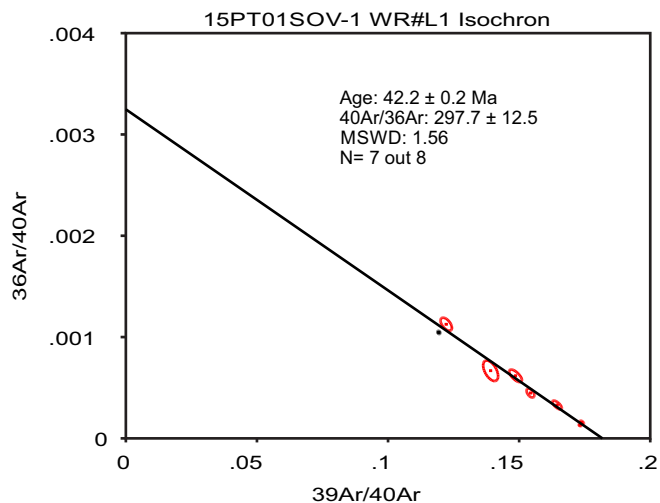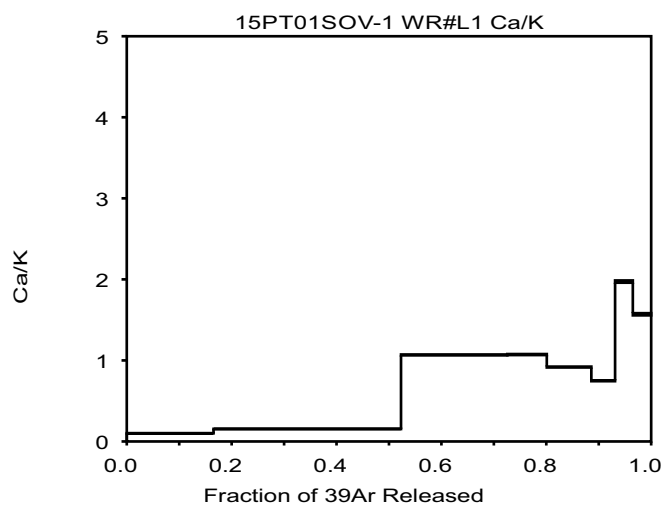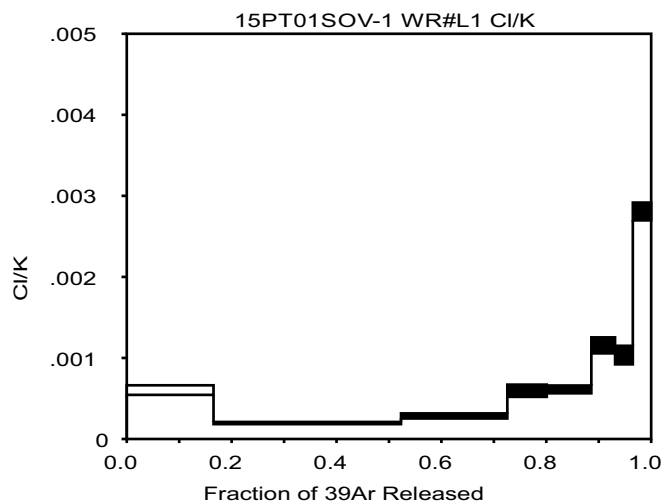

Patrick Terhune, Figure DR5.9

Supplement: Supplementary file 3 [file 22411770]

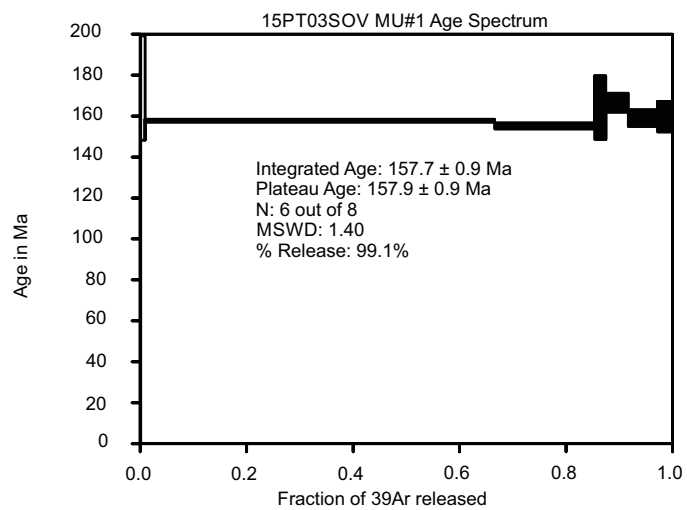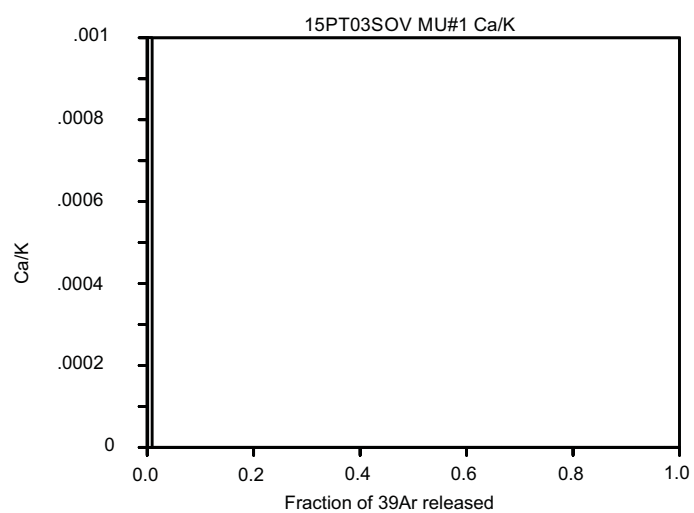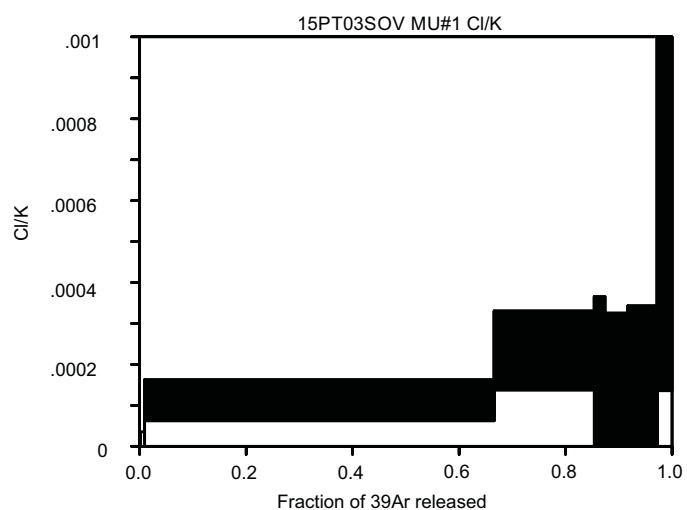

Patrick Terhune, Figure DR5.3

Supplement: Supplementary file 4 [file 22411770]

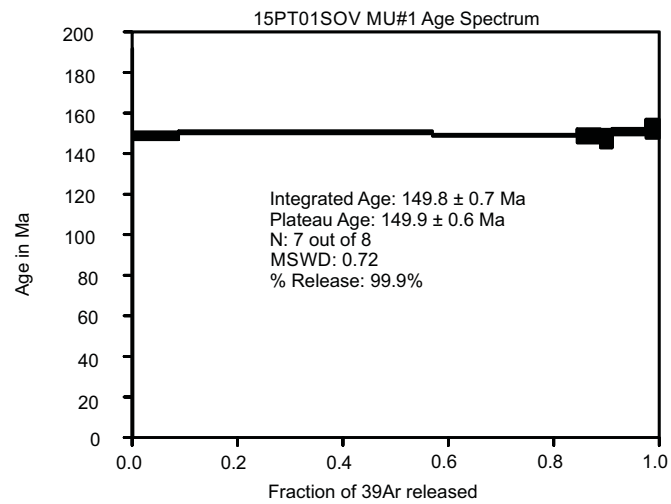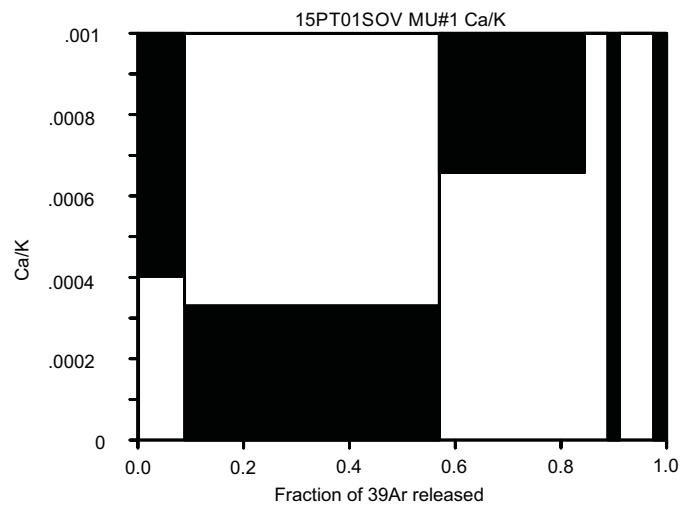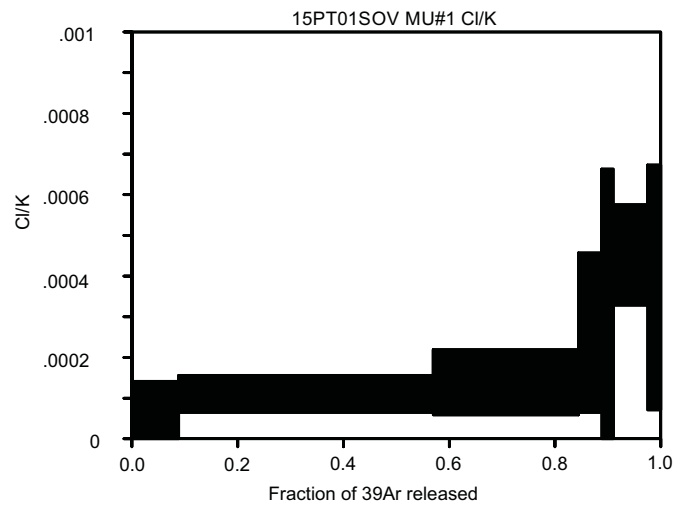

Patrick Terhune, Figure DR5.2

Supplement: Supplementary file 5 [file 22411770]

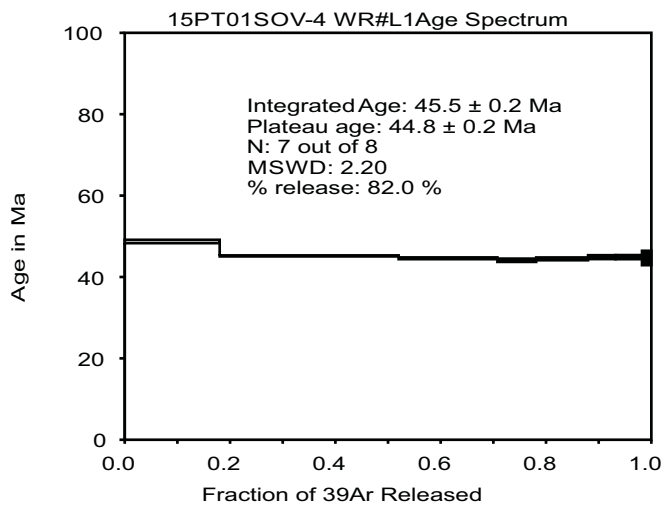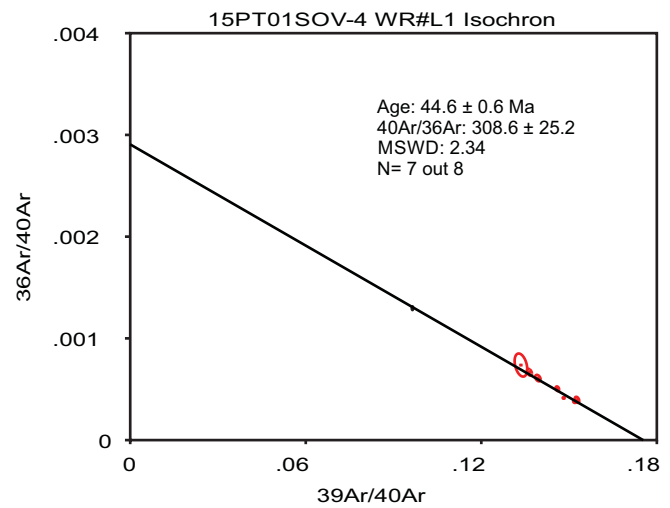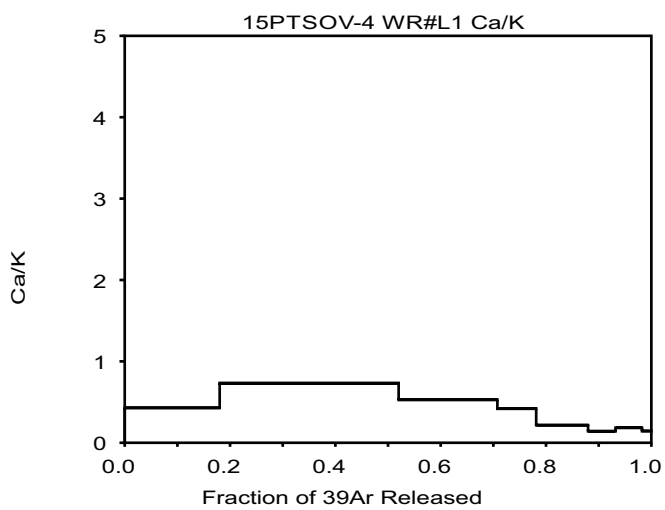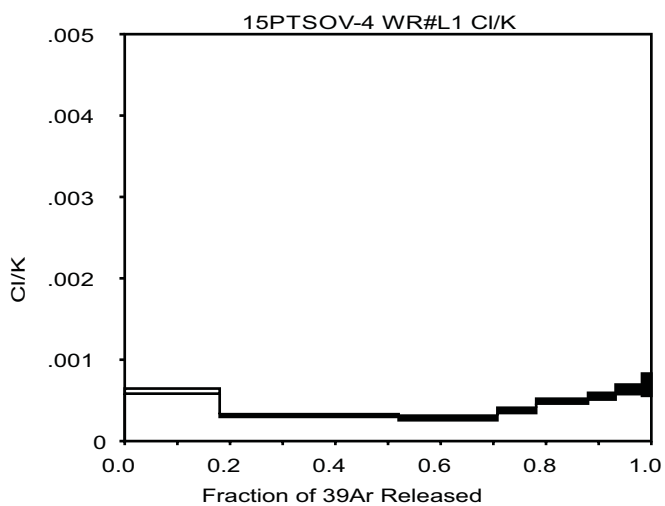

Patrick Terhune, Figure DR5.12

Supplement: Supplementary file 6 [file 22411770]

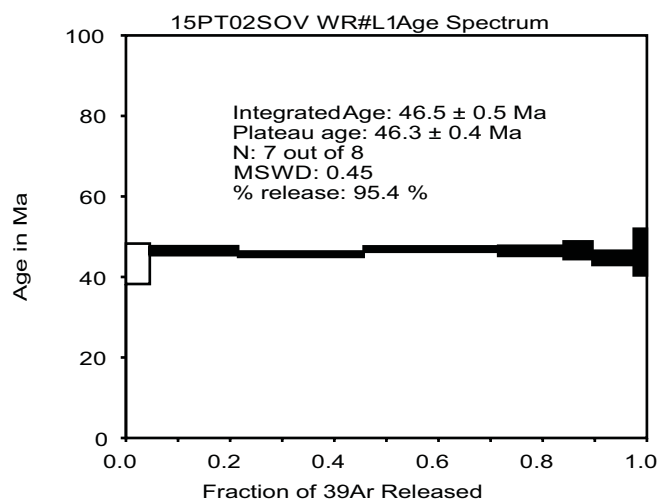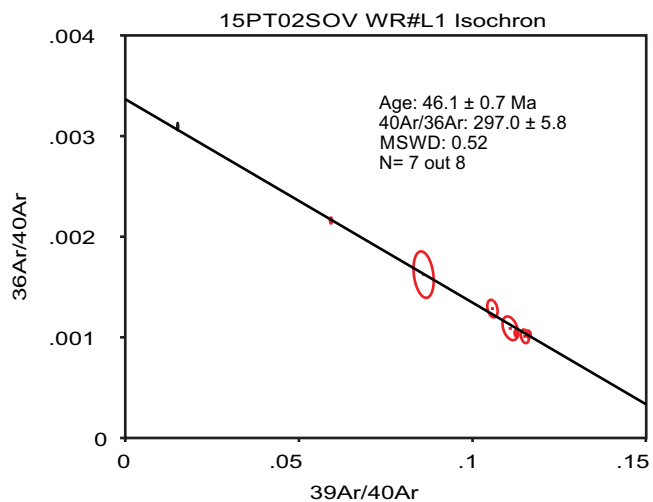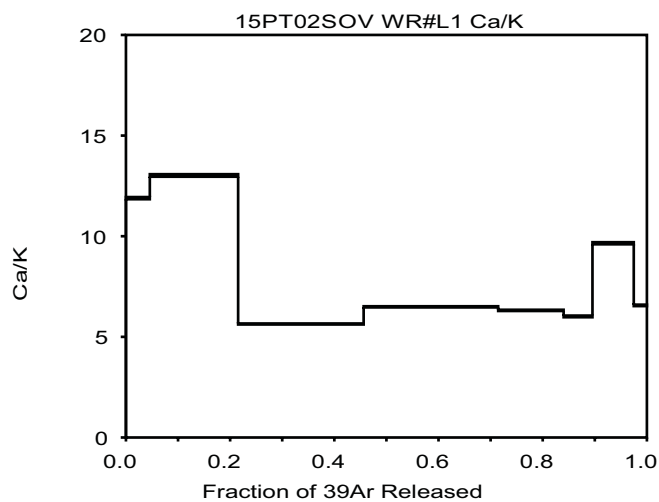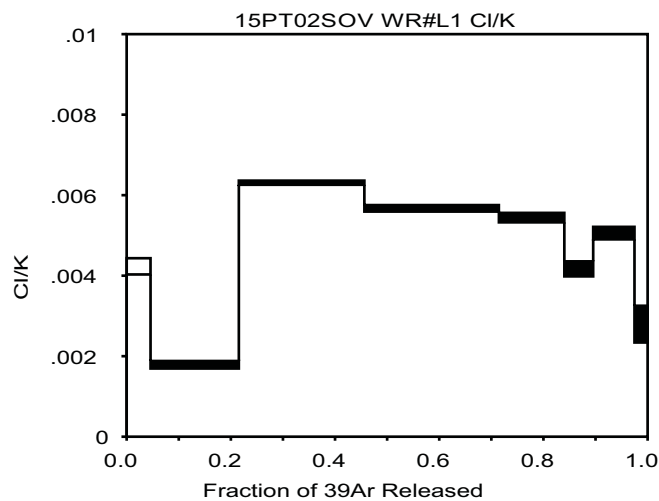

Patrick Terhune, Figure DR5.14

Supplement: Supplementary file 7 [file 22411770]

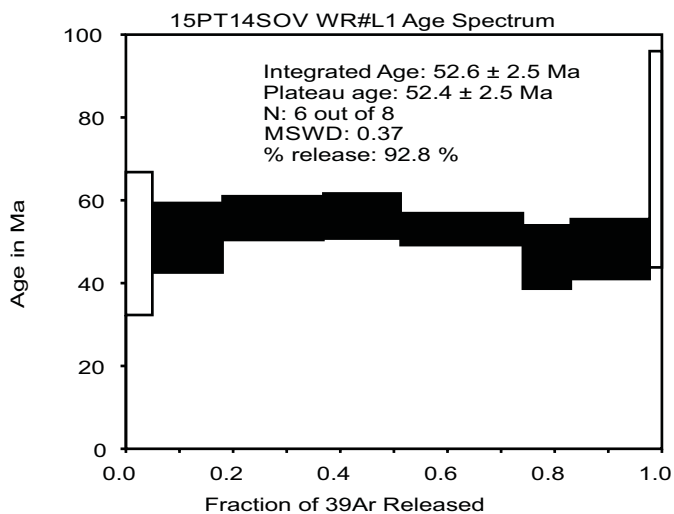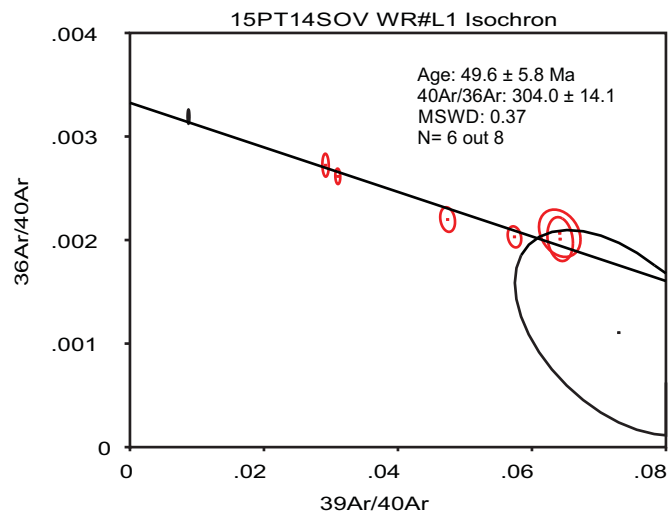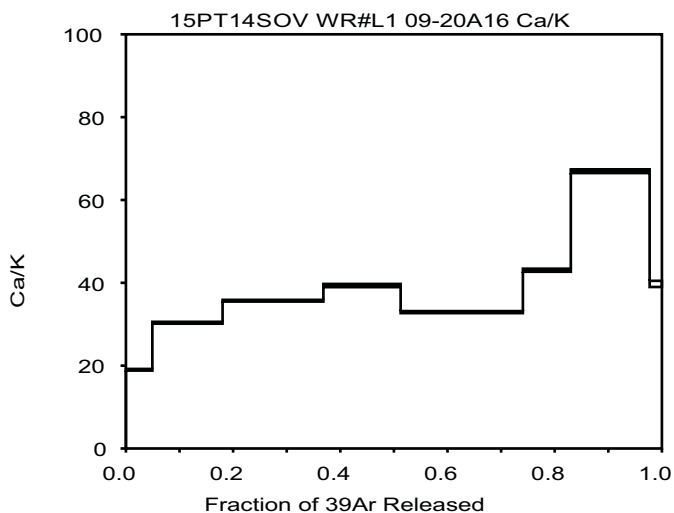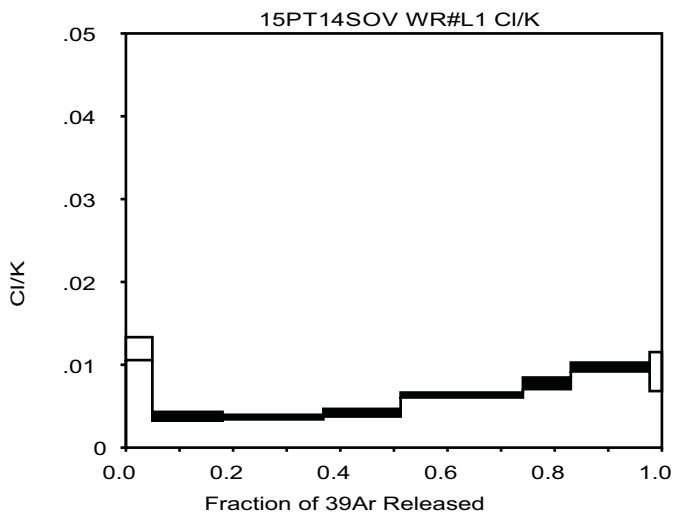

Patrick Terhune, Figure DR5.15

Supplement: Supplementary file 9 [file 22411770]

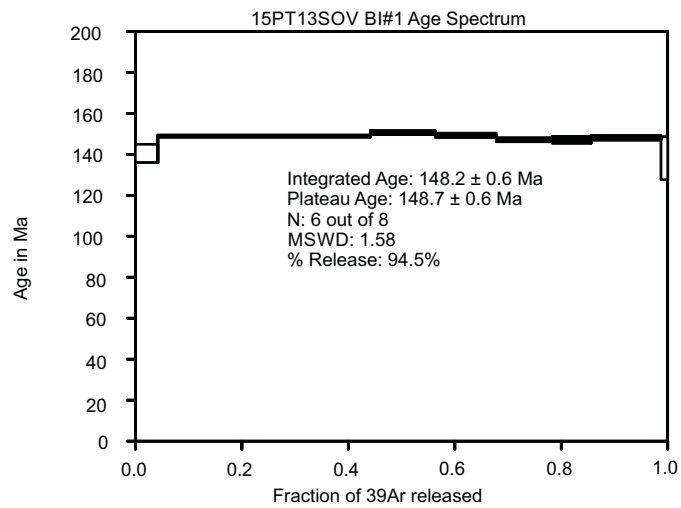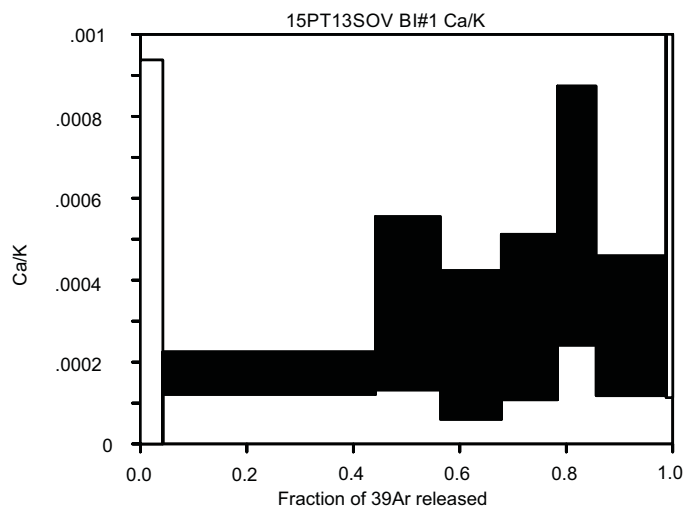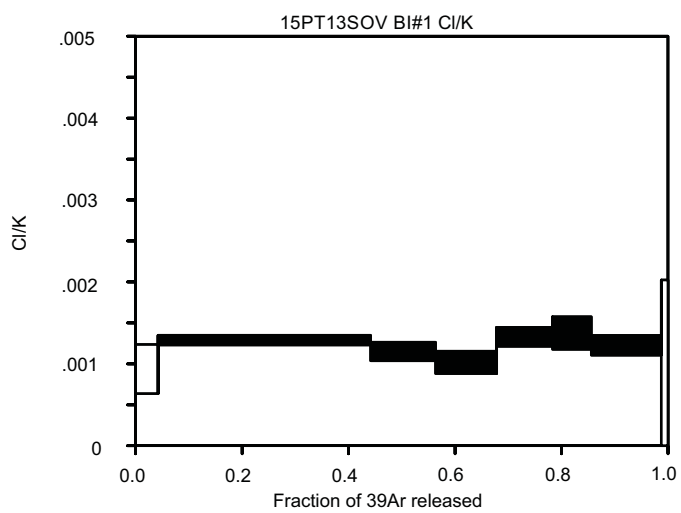

Patrick Terhune, Figure DR5.5

Supplement: Supplementary file 10 [file 22411770]

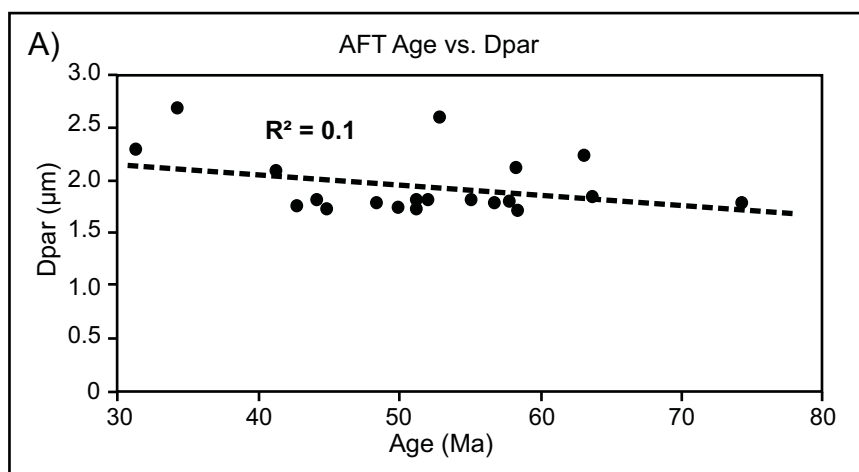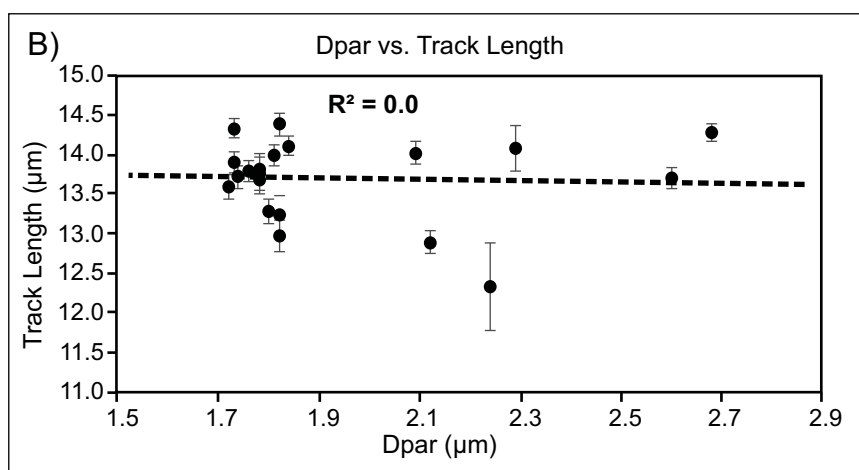

DR7A, B

Supplement: Supplementary file 11 [file 22411770]

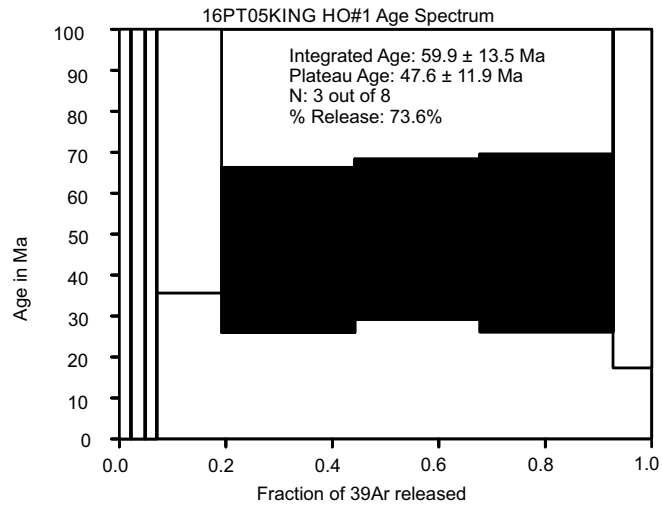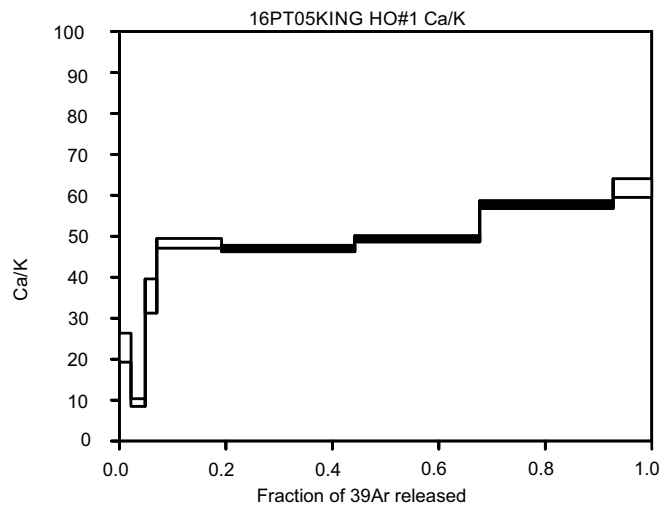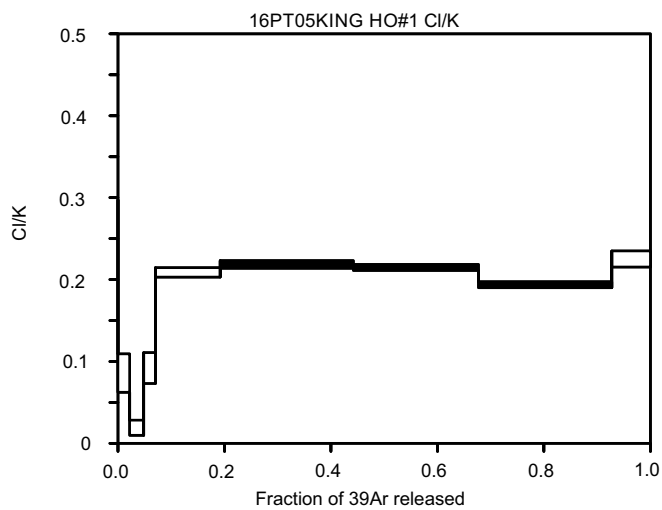

Patrick Terhune, Figure DR5.1

Supplement: Supplementary file 12 [file 22411770]

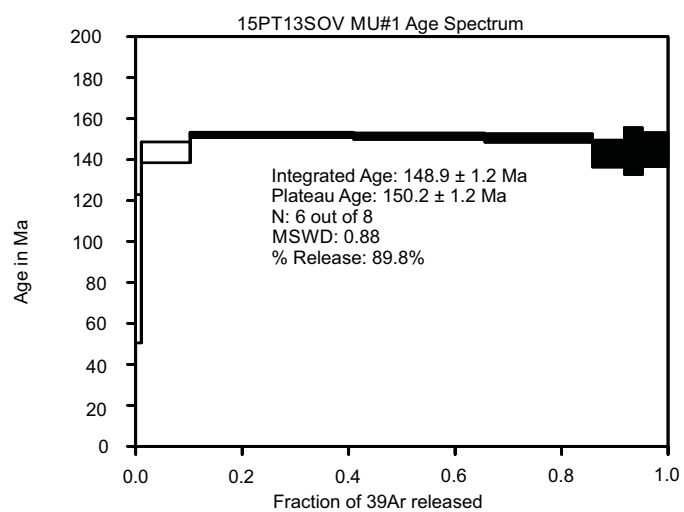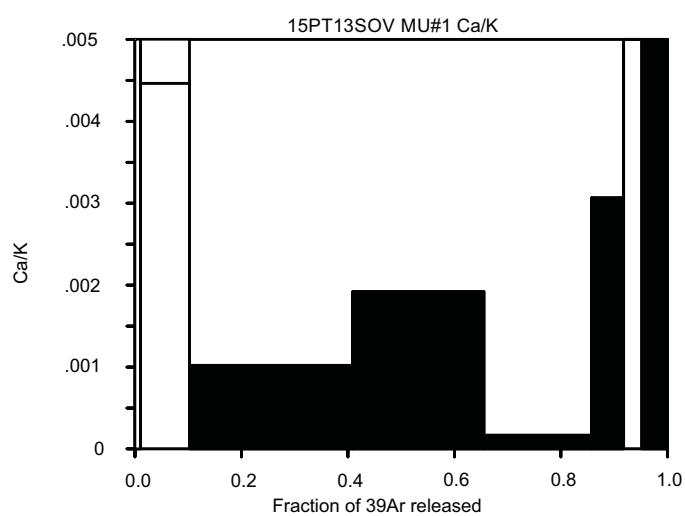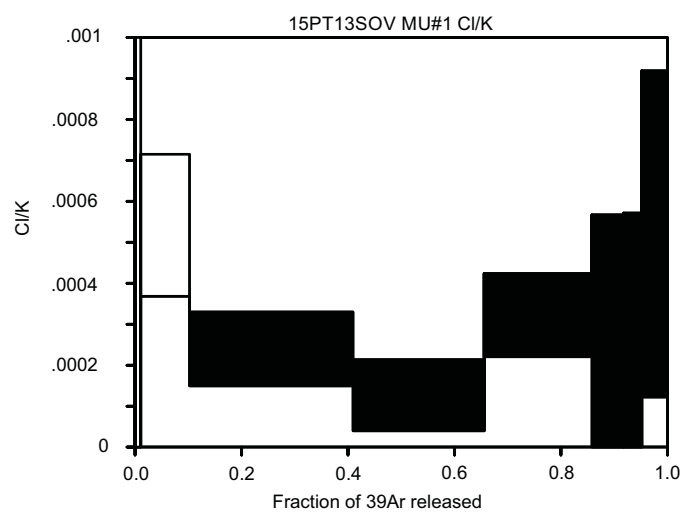

Patrick Terhune, Figure DR5.4

Supplement: Supplementary file 14 [file 22411770]

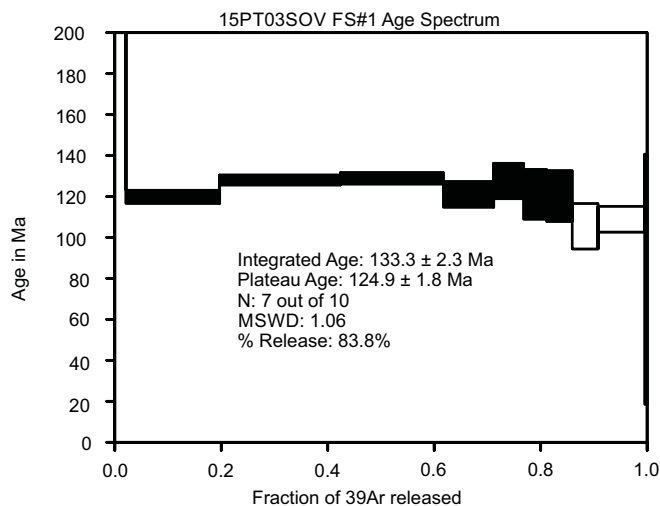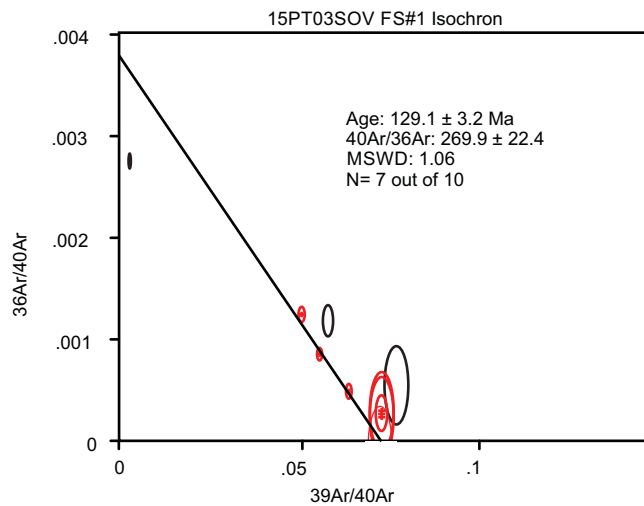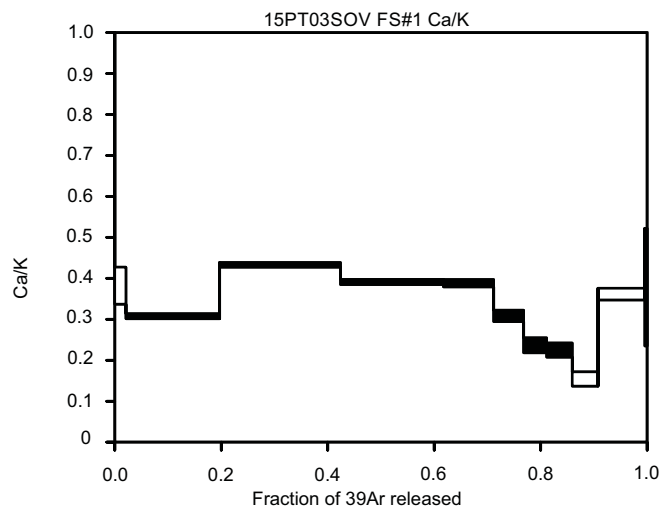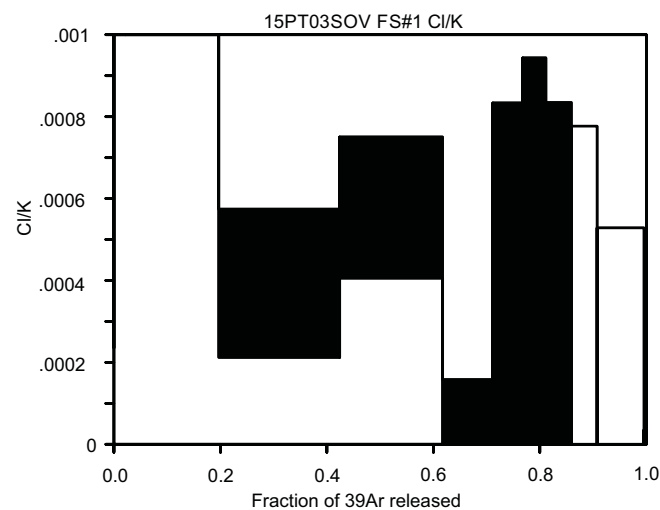

Patrick Terhune, Figure DR5.8

Supplement: Supplementary file 15 [file 22411770]

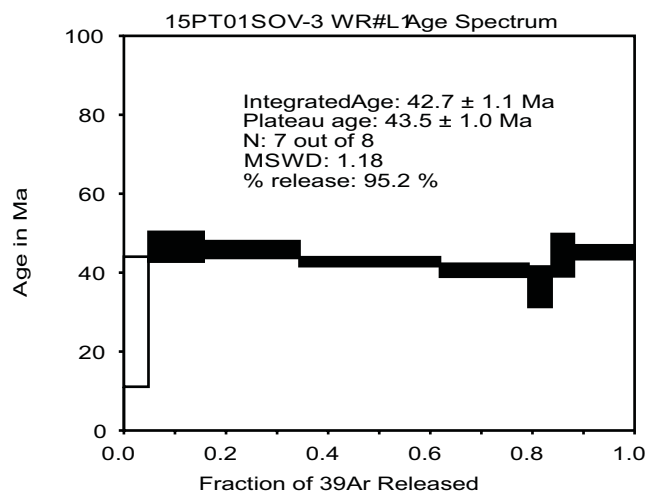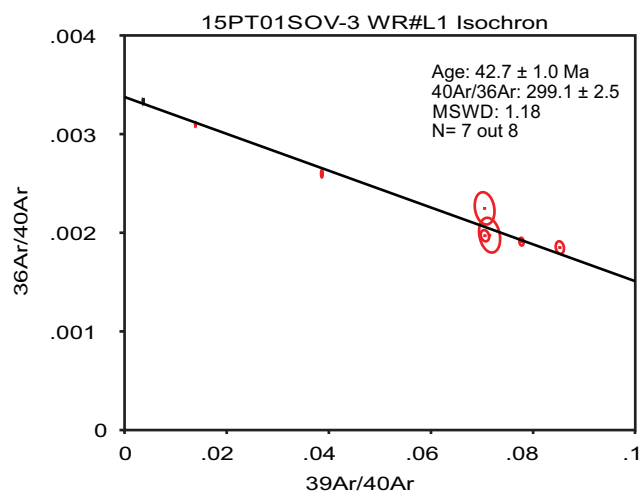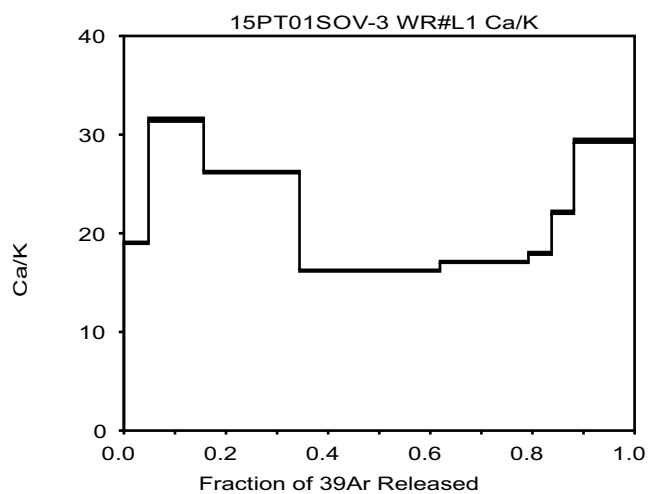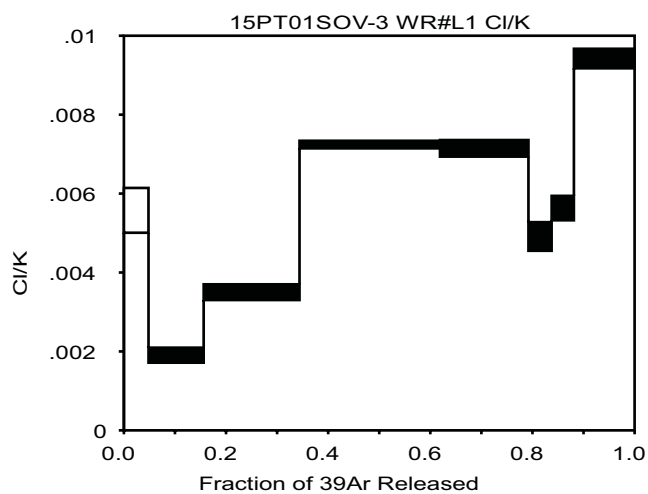

Patrick Terhune, Figure DR5.11

Supplement: Supplementary file 16 [file 22411770]

## Gray Ridge

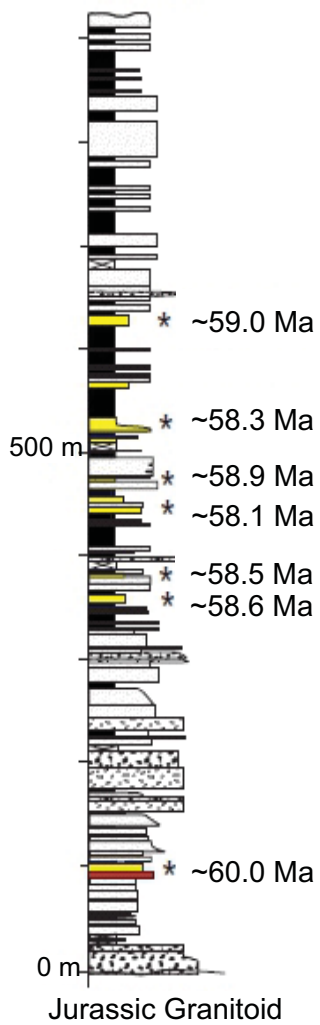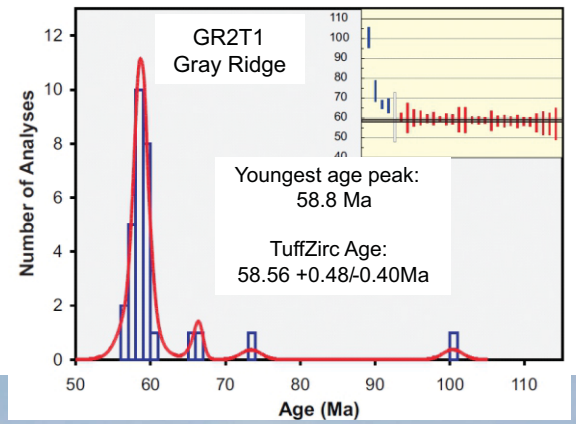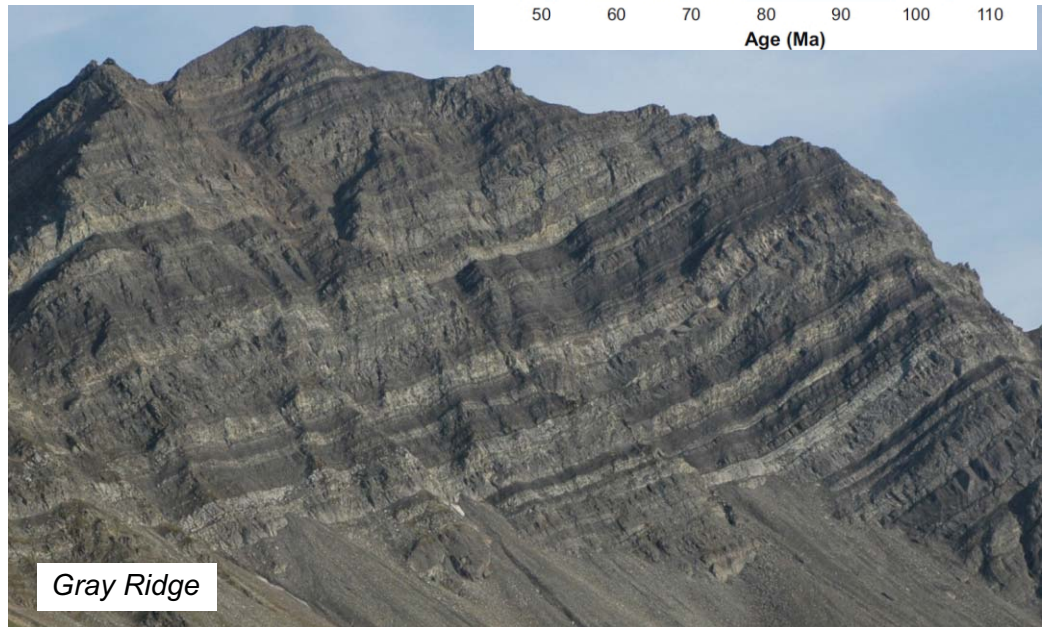

Patrick Terhune, DR9

Supplement: Supplementary file 17 [file 22411770]

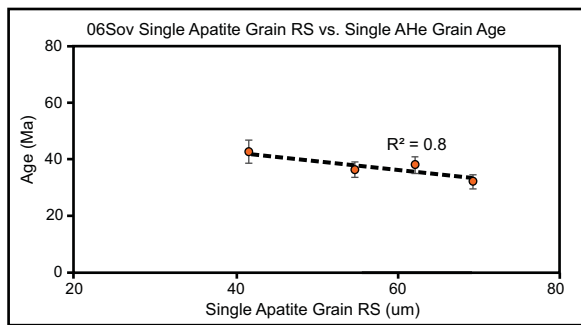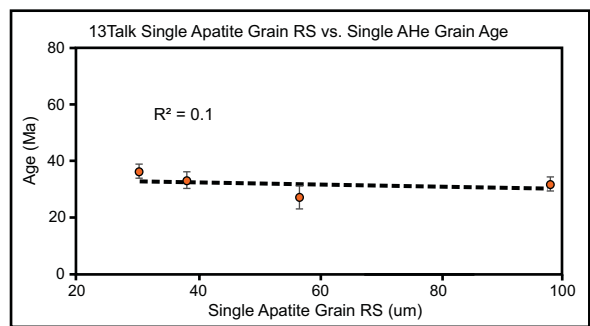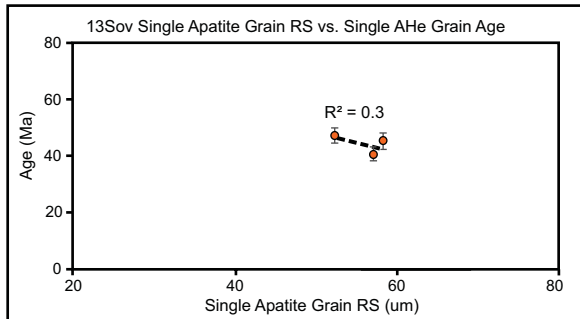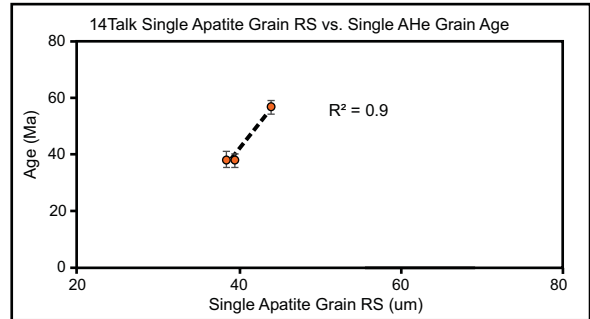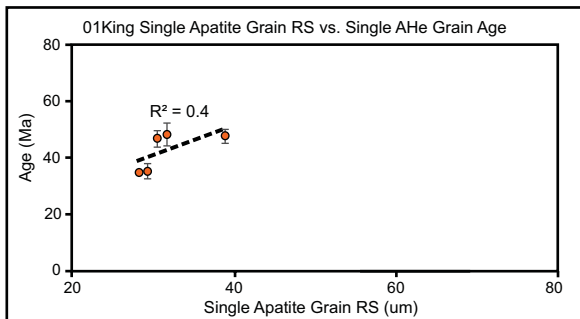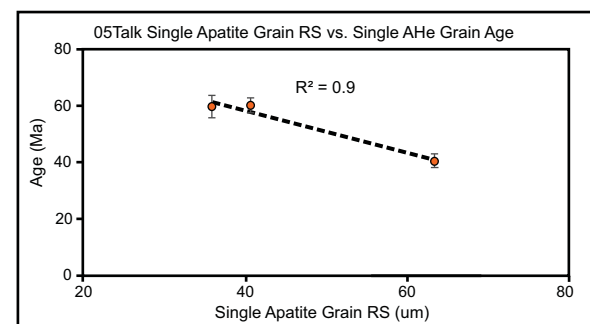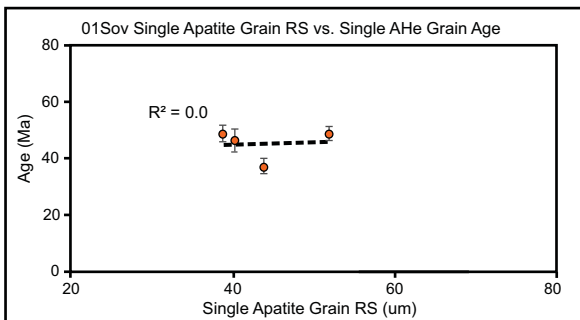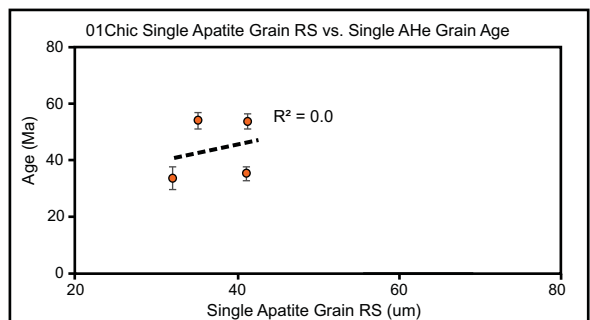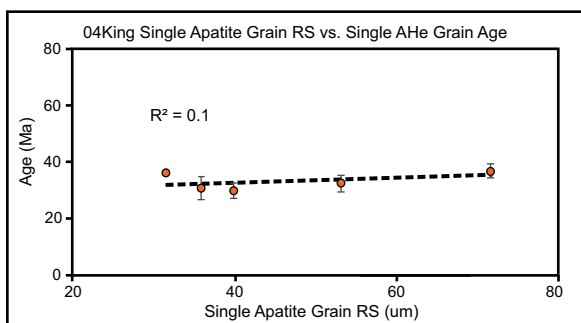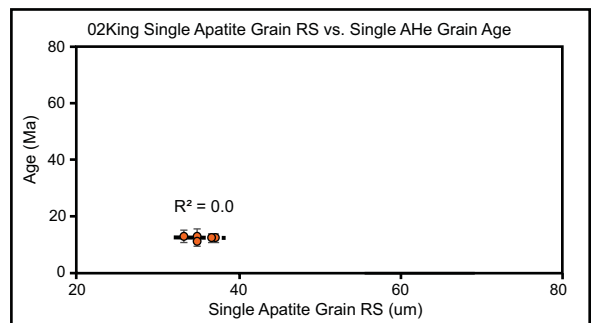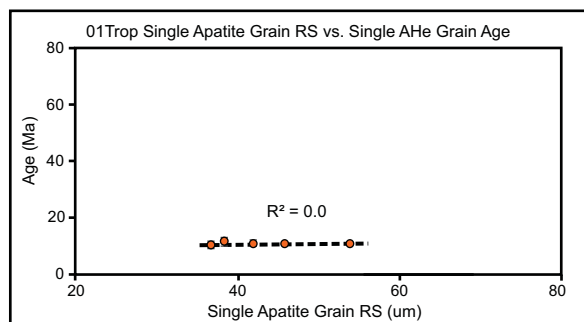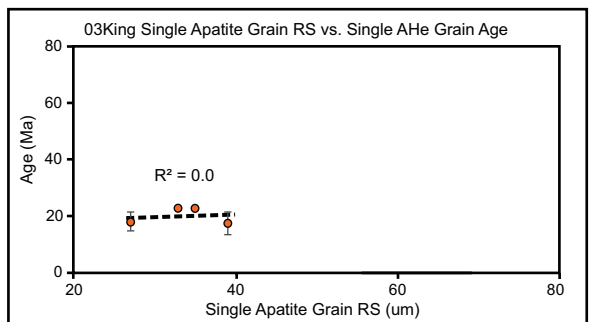

DR7A

Supplement: Supplementary file 18 [file 22411770]

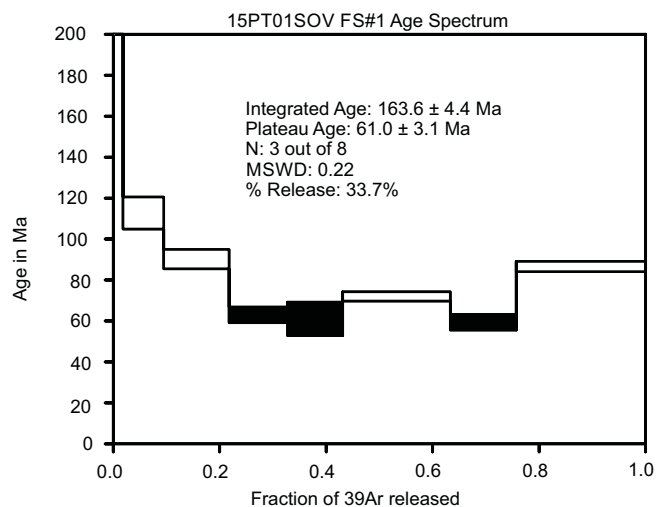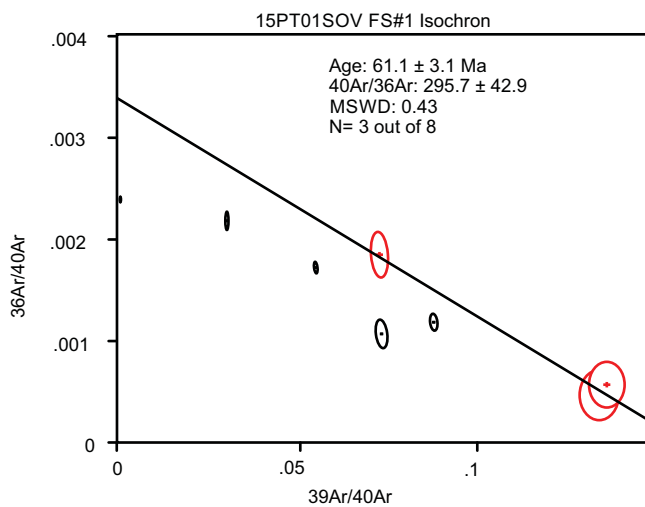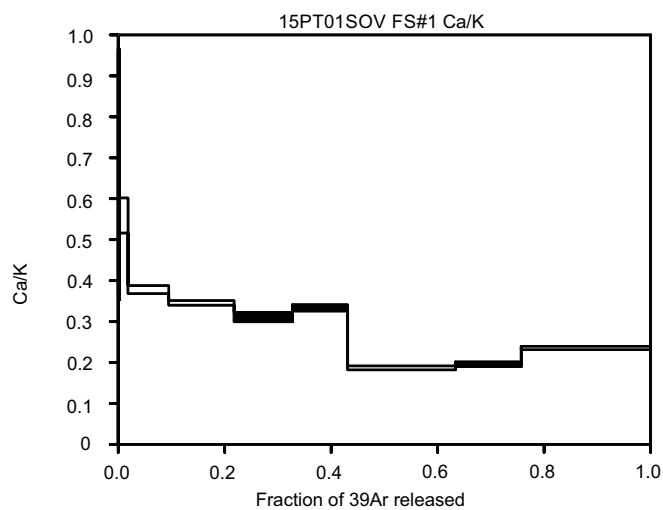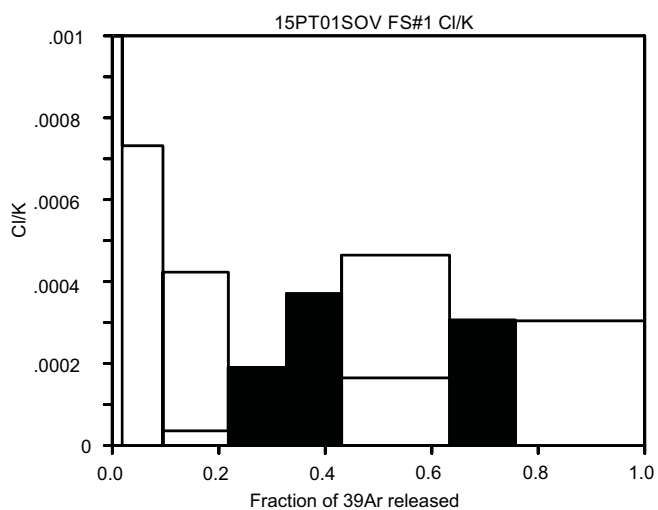

Patrick Terhune, Figure DR5.7

Supplement: Supplementary file 20 [file 22411770]

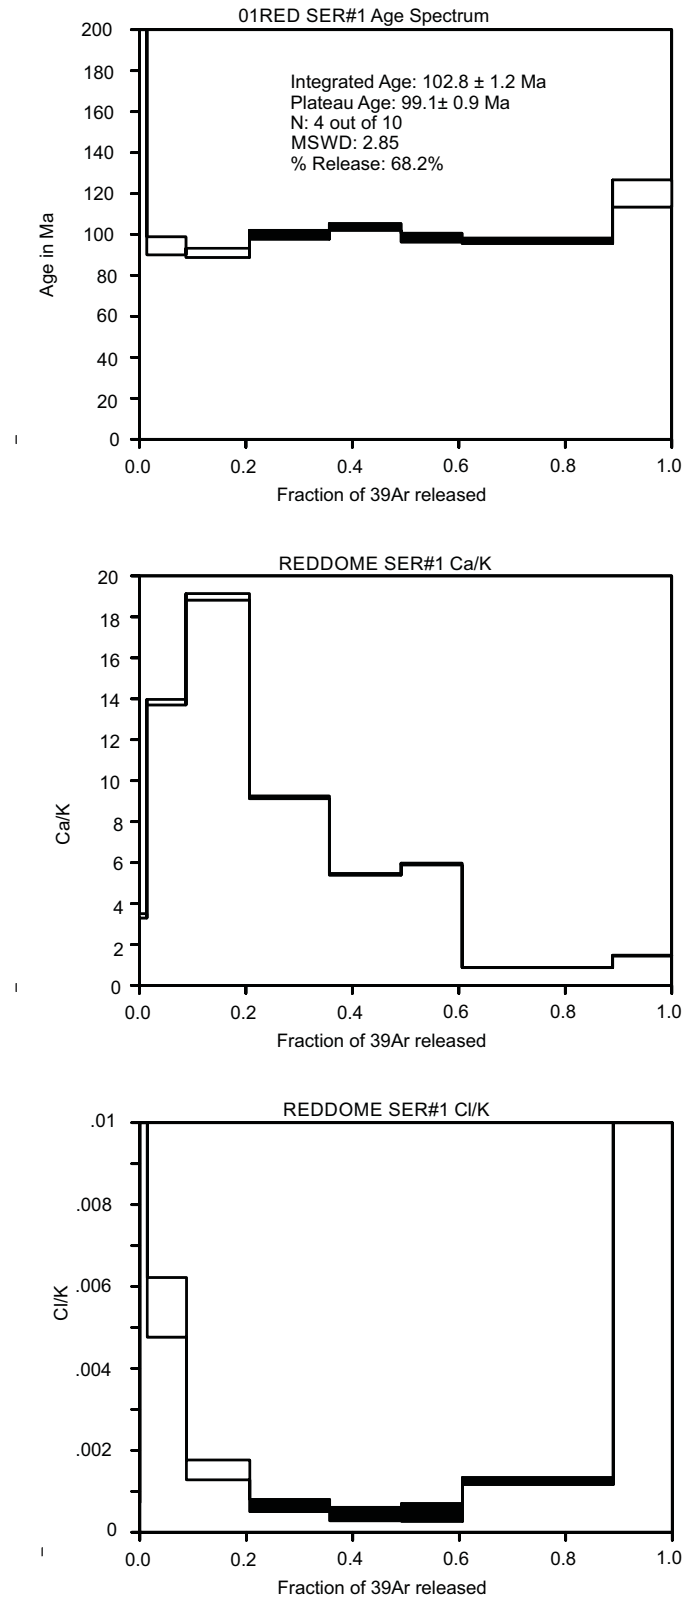

Patrick Terhune, Figure DR5.6

Supplement: Supplementary file 21 [file 22411770]

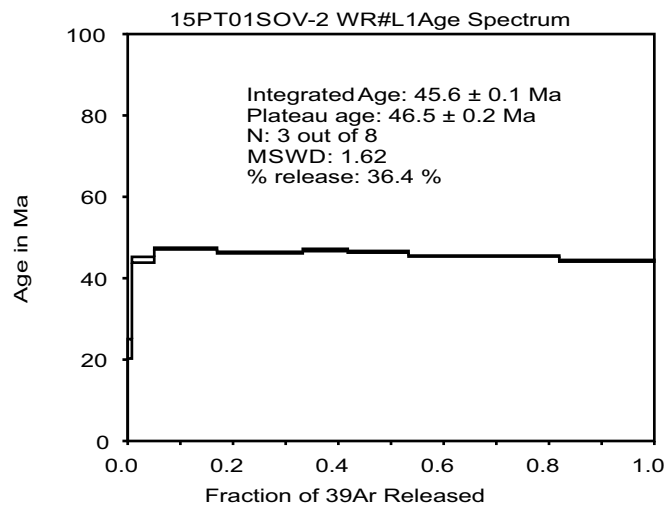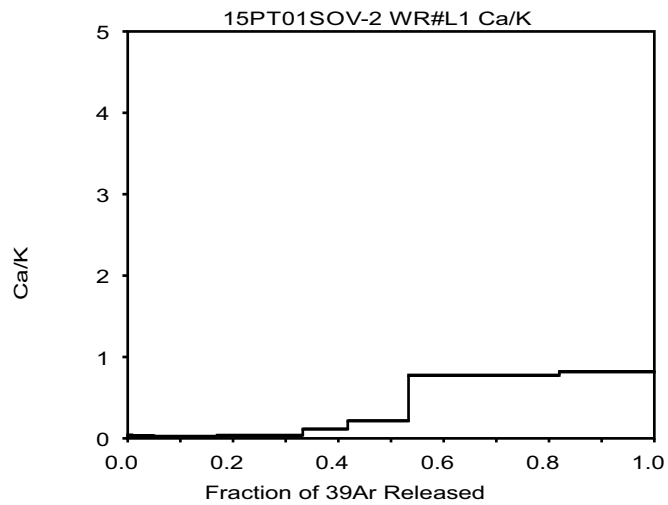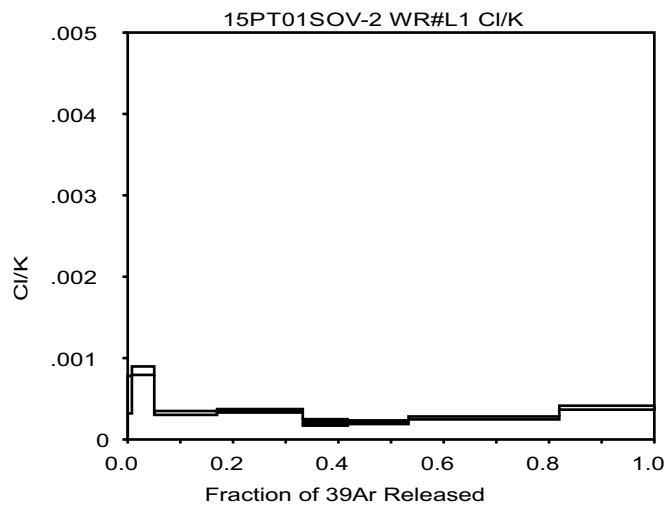

Patrick Terhune, Figure DR5.10

Supplement: Supplementary file 22 [file 22411770]
